# Supplementary material for: Evidence-informed and consensus-based statements about SAFEty of Physical Agent Modalities Practice in physiotherapy and rehabilitation medicine (SAFE PAMP): a national Delphi of healthcare scientific societies
Source: PubMed Central journal article supplement — BMJ Open. 2024 Mar 19;14(3):e075348. doi: 10.1136/bmjopen-2023-075348 (PMC10953005; doi:10.1136/bmjopen-2023-075348), 2024-03-19
Supplement: bmjopen-2023-075348.draft_revisions.pdf [file bmjopen-2023-075348.draft_revisions.pdf]

# BMJ Open

BMJ Open is committed to open peer review. As part of this commitment we make the peer review history of every article we publish publicly available.

When an article is published we post the peer reviewers' comments and the authors' responses online. We also post the versions of the paper that were used during peer review. These are the versions that the peer review comments apply to.

The versions of the paper that follow are the versions that were submitted during the peer review process. They are not the versions of record or the final published versions. They should not be cited or distributed as the published version of this manuscript.

BMJ Open is an open access journal and the full, final, typeset and author-corrected version of record of the manuscript is available on our site with no access controls, subscription charges or pay-per-view fees (<http://bmjopen.bmj.com>).

If you have any questions on BMJ Open's open peer review process please email [info.bmjopen@bmj.com](mailto:info.bmjopen@bmj.com)

# BMJ Open

## Evidence-informed and consensus-based indications about SAFETY of Physical Agent Modalities Practice in physiotherapy and rehabilitation medicine (SAFE PAMP): a national Delphi of healthcare scientific societies

|                               |                                                                                                                                                                                                                                                                                                                                                                                                                                                                                                                                                                                                                                                                                                                                                                                                                                                                                                                                                                                                           |
|-------------------------------|-----------------------------------------------------------------------------------------------------------------------------------------------------------------------------------------------------------------------------------------------------------------------------------------------------------------------------------------------------------------------------------------------------------------------------------------------------------------------------------------------------------------------------------------------------------------------------------------------------------------------------------------------------------------------------------------------------------------------------------------------------------------------------------------------------------------------------------------------------------------------------------------------------------------------------------------------------------------------------------------------------------|
| Journal:                      | <i>BMJ Open</i>                                                                                                                                                                                                                                                                                                                                                                                                                                                                                                                                                                                                                                                                                                                                                                                                                                                                                                                                                                                           |
| Manuscript ID                 | bmjopen-2023-075348                                                                                                                                                                                                                                                                                                                                                                                                                                                                                                                                                                                                                                                                                                                                                                                                                                                                                                                                                                                       |
| Article Type:                 | Original research                                                                                                                                                                                                                                                                                                                                                                                                                                                                                                                                                                                                                                                                                                                                                                                                                                                                                                                                                                                         |
| Date Submitted by the Author: | 05-May-2023                                                                                                                                                                                                                                                                                                                                                                                                                                                                                                                                                                                                                                                                                                                                                                                                                                                                                                                                                                                               |
| Complete List of Authors:     | Gianola, Silvia; IRCCS Galeazzi Orthopaedic Institute, Unit of Clinical Epidemiology<br>Bargeri, Silvia; IRCCS Galeazzi Orthopaedic Institute, Unit of Clinical Epidemiology<br>Pellicciari, Leonardo; IRCCS Istituto Delle Scienze Neurologiche di Bologna<br>Gambazza, Simone; Fondazione IRCCS Ca' Granda Ospedale Maggiore Policlinico<br>Rossetini, Giacomo; Università degli Studi di Verona, School of Physiotherapy<br>Fulvio, Anna; Associazione Italiana di Fisioterapia<br>Genovese, Vincenzo; Associazione Italiana di Fisioterapia<br>Benedini, Matteo; Associazione Italiana di Fisioterapia<br>Proverbio, Emanuele; Associazione Italiana di Fisioterapia<br>Cecchetto, Simone; Associazione Italiana di Fisioterapia; Provincia autonoma di Trento Azienda Provinciale per i Servizi Sanitari<br>Castellini, Greta; IRCCS Istituto Ortopedico Galeazzi, Clinical Epidemiology Unit<br>Turolla, Andrea; Alma Mater Studiorum University of Bologna; IRCCS Policlinico Sant'Orsola-Malpighi |
| Keywords:                     | Physical Therapy Modalities, REHABILITATION MEDICINE, Health & safety < HEALTH SERVICES ADMINISTRATION & MANAGEMENT                                                                                                                                                                                                                                                                                                                                                                                                                                                                                                                                                                                                                                                                                                                                                                                                                                                                                       |
|                               |                                                                                                                                                                                                                                                                                                                                                                                                                                                                                                                                                                                                                                                                                                                                                                                                                                                                                                                                                                                                           |

SCHOLARONE™  
Manuscripts

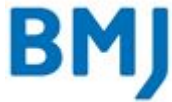

I, the Submitting Author has the right to grant and does grant on behalf of all authors of the Work (as defined in the below author licence), an exclusive licence and/or a non-exclusive licence for contributions from authors who are: i) UK Crown employees; ii) where BMJ has agreed a CC-BY licence shall apply, and/or iii) in accordance with the terms applicable for US Federal Government officers or employees acting as part of their official duties; on a worldwide, perpetual, irrevocable, royalty-free basis to BMJ Publishing Group Ltd ("BMJ") its licensees and where the relevant Journal is co-owned by BMJ to the co-owners of the Journal, to publish the Work in this journal and any other BMJ products and to exploit all rights, as set out in our [licence](#).

The Submitting Author accepts and understands that any supply made under these terms is made by BMJ to the Submitting Author unless you are acting as an employee on behalf of your employer or a postgraduate student of an affiliated institution which is paying any applicable article publishing charge ("APC") for Open Access articles. Where the Submitting Author wishes to make the Work available on an Open Access basis (and intends to pay the relevant APC), the terms of reuse of such Open Access shall be governed by a Creative Commons licence – details of these licences and which [Creative Commons](#) licence will apply to this Work are set out in our licence referred to above.

Other than as permitted in any relevant BMJ Author's Self Archiving Policies, I confirm this Work has not been accepted for publication elsewhere, is not being considered for publication elsewhere and does not duplicate material already published. I confirm all authors consent to publication of this Work and authorise the granting of this licence.

1  
2  
3 1 **Evidence-informed and consensus-based indications about SAFETY of Physical**  
4  
5  
6 2 **Agent Modalities Practice in physiotherapy and rehabilitation medicine (SAFE**  
7  
8 3 **PAMP): a national Delphi of healthcare scientific societies**  
9  
10  
11 4

12  
13 5 ***Authors List***  
14

15 6 *Silvia Gianola<sup>1</sup>, Silvia Bargerì<sup>1</sup>, Leonardo Pellicciari<sup>2</sup>, Simone Gambazza<sup>3</sup>, Giacomo Rossettini<sup>4</sup>, Anna*  
16  
17 7 *Fulvio<sup>5</sup>, Vincenzo Genovese<sup>5</sup>, Matteo Benedini<sup>5</sup>, Emanuele Proverbio<sup>5</sup>, Simone Cecchetto<sup>5,6</sup>, Greta*  
18  
19 8 *Castellini<sup>1\*</sup>, Andrea Turolla<sup>7,8\*</sup> and SAFE PAMP Collaborators*  
20  
21  
22 9

- 23  
24  
25 10 1. IRCCS Istituto Ortopedico Galeazzi, Unit of Clinical Epidemiology, Milan, Italy  
26  
27 11 2. IRCCS Istituto delle Scienze Neurologiche di Bologna, Bologna, Italy  
28  
29 12 3. Healthcare Professions Department, Fondazione IRCCS Ca' Granda Ospedale Maggiore Policlinico,  
30  
31 13 Milan, Italy  
32  
33 14 4. School of Physiotherapy, University of Verona, Verona, Italy  
34  
35 15 5. Associazione Italiana di Fisioterapia (AIFI), Rome, Italy  
36  
37 16 6. Direction of Health Professions, APSS, 38014 Trento, Italy.  
38  
39 17 7. Department of Biomedical and Neuromotor Sciences-DIBINEM, Alma Mater Studiorum Università  
40  
41 18 di Bologna, 40138 Bologna, Italy.  
42  
43 19 8. Division of Occupational Medicine, IRCCS Policlinico Sant'Orsola-Malpighi, 40138 Bologna, Italy.  
44  
45  
46

47 20 <sup>^</sup>corresponding author  
48  
49

50 21 \*co-last  
51  
52

53 22 ***SAFE PAMP Collaborators***  
54

55 23 *Chiara Torresetti, on behalf of AIUG (Associazione Italiana di Urologia Ginecologia e del Pavimento Pelvico)*  
56  
57

58 24 *Bianca Masturzo, on behalf of AOGOI (Associazione Ostetrici Ginecologi Ospedalieri Italiani)*  
59

60 25 *Carla Berliri, on behalf of Cittadinanzattiva Associazione di Promozione Sociale*

- 1  
2  
3 26 *Mauro Roselli, on behalf of OTODI (Ortopedici e Traumatologi Ospedalieri D'Italia)*  
4  
5 27 *Stefano Vercelli, on behalf of FIASF (Federazione Italiana delle Associazioni Scientifiche di Fisioterapia)*  
6  
7 28 *Marco Scorcu, on behalf of FMSI (Federazione Medico Sportiva Italiana)*  
8  
9 29 *Giuseppe Botta, on behalf of SIFL (Società Italiana di Flebologia)*  
10  
11 30 *Luigi Nappi, on behalf of SIGO (Società Italiana Di Ginecologia E Ostetricia)*  
12  
13 31 *Gianmarco Rea, on behalf of SIMG (Società Italiana di Medicina Generale e delle cure primarie)*  
14  
15 32 *Enrico Marinelli, on behalf of SIMLA (Società Italiana di Medicina Legale e delle Assicurazioni)*  
16  
17 33 *Fabio Bandini, on behalf of SIN (Società Italiana di Neurologia)*  
18  
19 34 *Roberto Bortolotti, on behalf of SIR (Società italiana di Reumatologia)*  
20  
21 35 *Viviana Rosati, on behalf of SIRN (Società Italiana di Riabilitazione Neurologica)*  
22  
23 36 *Armando Perrotta, on behalf of SISC (Società Italiana per lo Studio delle Cefalee)*  
24  
25 37 *Gianfranco Lamberti, on behalf of SIUD (Società Italiana di Urodinamica)*  
26  
27 38 *Monica Pierattelli, on behalf of SICuPP (Società Italiana Delle Cure Primarie Pediatriche)*  
28  
29 39 *Giancarlo Tancredi, on behalf of SIP (Società Italiana di Pediatria).*  
30  
31  
32  
33  
34  
35  
36  
37  
38  
39  
40  
41  
42  
43  
44  
45  
46  
47  
48  
49  
50  
51  
52  
53  
54  
55  
56  
57  
58  
59  
60

1  
2  
3 **ABSTRACT: 264 words**  
4

5 **Objective:** A shared consensus on safety about Physical Agent Modalities (PAMs) in physiotherapy  
6  
7 and rehabilitation is lacking. We aimed to develop evidence-informed and consensus-based  
8  
9 indications about safety of PAMs.  
10

11  
12 **Study design and setting:** A RAND-modified Delphi rounds' survey was used to reach a consensus.  
13  
14 We established a steering committee of the Italian Association of Physiotherapy (Associazione  
15  
16 Italiana di Fisioterapia - AIFI) to identify areas and questions for developing indications about the  
17  
18 safety of most common used PAMs in physiotherapy and rehabilitation. We invited 28 National  
19  
20 Scientific and Technical Societies (STS) as a multidisciplinary and multi-professional panel of  
21  
22 experts to evaluate the proposed indications and formulate additional inputs. The level of agreement  
23  
24 was measured with a 9-points Likert scale. Consensus in the Delphi rounds was assessed using the  
25  
26 rating proportion with a threshold of 75%.  
27  
28  
29

30 **Results:** Seventeen (61%) out of 28 STS participated involving their most representative expert  
31  
32 member. Experts composing the panel were mainly clinicians (88%) reporting multiple expertise in  
33  
34 musculoskeletal (47%), pelvic floor (24%), neurological (18%) and lymphatic (6%) disorders with a  
35  
36 median experience of 30 years (IQR=17-36). Two Delphi rounds were necessary to reach a  
37  
38 consensus. The final approved criteria list comprised nine indications about the safety of PAMs in  
39  
40 adults (electrical stimulation neuromodulation, extracorporeal shock wave therapy, laser therapy,  
41  
42 electromagnetic therapy, diathermy, hot thermal agents, cryotherapy and therapeutic ultrasound) with  
43  
44 a general note about populations subgroups.  
45  
46  
47

48  
49 **Conclusions:** The resulting evidence-based indications inform patients, healthcare providers and  
50  
51 policy-makers regarding the safe application of PAMs in physiotherapy and rehabilitation. Future  
52  
53 research is needed to extend this consensus on pediatric, adolescent and frail patients.  
54  
55

56  
57 **Key Words:** Physical Therapy Modalities, Safety, Rehabilitation, Physical and Rehabilitation  
58  
59 Medicine, Delphi Technique  
60

1  
2  
3 65 **STRENGTH AND LIMITATIONS**  
4  
5

- 6  
7 66 • Indications developed about safety of Physical Agents Modalities in rehabilitation have a solid  
8  
9 67 scientific background coming from 117 systematic reviews  
10  
11 68 • Indications were discussed and approved by a multidisciplinary and multiprofessional panel  
12  
13 69 of experts including clinicians, researchers, healthcare managers, forensic, patients and lay  
14  
15 70 members  
16  
17  
18 71 • The main limitation is that indications were not extended to specific subgroups of patients  
19  
20 72 (e.g., children, adolescents, frail, etc.) since insufficient literature is available.  
21  
22  
23  
24  
25  
26  
27  
28  
29  
30  
31  
32  
33  
34  
35  
36  
37  
38  
39  
40  
41  
42  
43  
44  
45  
46  
47  
48  
49  
50  
51  
52  
53  
54  
55  
56  
57  
58  
59  
60

## 73 INTRODUCTION

74 Physical agent modalities (PAMs) such as electrical stimulation, extracorporeal shock wave therapy,  
75 laser therapy, hot/cold thermal agents are widely used in adjunction to other physiotherapy and  
76 rehabilitation treatments to produce therapeutic responses in tissues (e.g., reducing pain and swelling)  
77 <sup>1-4</sup>. Among different interventions, they are prescribed and applied by healthcare professionals in  
78 various medical specialties (e.g., neurology, orthopedics, geriatrics, pediatrics, oncology,  
79 urogynecology) to carry on patient-centered healthcare pathways. However, both clinicians and  
80 patients should be informed about their safety with regard to patient-centered care pathways<sup>5</sup>. A  
81 Canadian guideline on contraindications and precautions in the use of the six most common physical  
82 agents (i.e., ultrasound, cryotherapy, superficial thermal agents, electrical stimulation, low-level laser  
83 therapy, and short-wave diathermy) was published in 2010; for example, deep vein thrombosis or  
84 thrombophlebitis and haemorrhagic conditions, pacemaker or other implanted electronic device, were  
85 reported as contraindications for all the six physical agents.<sup>6</sup>

86 Moreover, the safety of PAMs in patients undergoing physical therapy and rehabilitation was recently  
87 assessed by a recent scoping review investigating the occurrence of adverse events after the  
88 application of these therapies<sup>7, 8</sup>: nine PAMs (i.e., cryotherapy, electrical stimulation, transcutaneous  
89 electrical nerve stimulation, functional electrical stimulation, extracorporeal shockwave therapy, laser  
90 therapy, magnetotherapy, pulsed electromagnetic field and diathermy) and no important harms about  
91 these interventions were found, except for extracorporeal shockwave therapy reporting mild adverse  
92 events.

93 However, an up-to-date multidisciplinary and multiprofessional expert consensus on PAMs safety is  
94 still lacking. Therefore, the purpose of SAFE PAMP (SAFEty of Physical Agent Modalities Practice)  
95 consensus in physiotherapy and rehabilitation is to develop evidence-informed and consensus-based  
96 indications<sup>9</sup> on safety of PAMs, by consensus via a RAND Delphi procedure among content experts.



## 99 METHODS

### 100 Design

101 A RAND-modified Delphi rounds' survey process was used as the facilitation technique for reaching  
102 consensus<sup>10</sup>. We followed the guidance on "Conducting and REporting of DELphi Studies" (CREDES)  
103 that can be generalized for our field<sup>11</sup>, according with the EQUATOR initiative<sup>9</sup>.

104 This project is exempted from ethical approval according to the "ethics and data protection"  
105 regulations of the European Commission<sup>12</sup>. More details are reported in **Supplementary File 1**. The  
106 protocol was a-priori registered on OSF online repository (<https://osf.io/53j27>).

107  
108 The process consisted of three phases: (i) establishment of the steering committee and invitation of  
109 experts from scientific and technical societies (STS) to constitute the panel; (ii) generation of  
110 indications by the steering committee using a comprehensive approach based on a published scoping  
111 review of existing systematic reviews on PAMs safety in physiotherapy and rehabilitation medicine<sup>7</sup>,  
112 <sup>8</sup> and on expertise from content expert consultations; (iii) voting of indications through a national  
113 Delphi survey from the panel of experts aiming to identify, assess and modify indications importance  
114 for each field (e.g., musculoskeletal); (iv) as last round, an online workshop meeting was attended by  
115 participants to finalize the list of indications reaching the final consensus (**Figure 1**). Finally, we  
116 planned a dissemination of the final indications list as good clinical practices.

[Figure 1]

### 120 **Phase I. Establishment of the steering committee and panel of experts**

#### 121 *Steering committee*

122 In June 2022, the project team nominated a steering committee that was responsible for: the definition  
123 of the list of indications, the selection of STS for expert participants, the development of the Delphi  
124 questionnaires, the analysis of responses and handling of feedback from participants, after each round.

1  
2  
3 125 The steering committee involved 11 content experts and members of the Italian Association of  
4  
5 126 Physiotherapy (Associazione Italiana di Fisioterapia – AIFI). In order to assure the external validity  
6  
7  
8 127 of the consensus process, the group included two content experts on PAMs (MB, EP), three on  
9  
10 128 rehabilitation of musculoskeletal disorders (GR, VG, SB), one on neurological physiotherapy and  
11  
12 129 neuroscience (AT), one on pelvic floor rehabilitation (AF), and four methodologists (SGa, SGi, GC,  
13  
14 130 LP).

15  
16  
17 131  
18  
19 132 *Panel of experts*

20  
21 133 It is known that the impact of the quality of the final recommendations is given by the diversity of a  
22  
23  
24 134 Delphi panel whereas no agreement on the panel size for Delphi studies exist. Panels of 20–30  
25  
26 135 participants are common.<sup>13, 14</sup> Thus, the steering committee invited 28 multidisciplinary and  
27  
28 136 multiprofessional STS dealing with physiotherapy and rehabilitation care. These STS are entitled to  
29  
30  
31 137 generate good clinical practice guidelines by the published list of the Italian Ministry of Health <sup>15, 16</sup>.  
32  
33 138 The panel of expert members was multidisciplinary and multiprofessional including clinicians,  
34  
35 139 researchers, and healthcare managers coming from different fields<sup>14</sup> (e.g, orthopedics, neurology).  
36  
37 140 The panel included also forensic, patients and lay members (e.g., people working with relevant  
38  
39  
40 141 voluntary organizations). Each STS delegated the most representative member involved in  
41  
42 142 physiotherapy and rehabilitation care to join the panel of experts.  
43  
44  
45 143

46  
47 144 ***Phase II. Generation of indications***

48  
49 145 The steering committee formulated indications ensuring that all the potentially relevant topics in the  
50  
51 146 field would be included in the initial list of questions, for the first Delphi round.  
52  
53  
54 147 Indications to be included in the questionnaires were selected based on the literature<sup>7, 8</sup> and clinical  
55  
56 148 expertise. We moved from a recent scoping review including 117 systematic reviews on the safety of  
57  
58 149 PAMs in physiotherapy and rehabilitation medicine<sup>7, 8</sup>. This type of review is a method for knowledge  
59  
60 150 synthesis used to map the concepts underpinning a research area and the main sources and type of

1  
2  
3 151 evidence available. Clinical expertise was assured by content experts of AIFI in musculoskeletal  
4  
5 152 disorders, neurological physiotherapy and pelvic floor rehabilitation. They discussed indications  
6  
7  
8 153 through brainstorming on the following research area:

- 10 154 1. Electrical stimulation
- 11  
12 155 2. Neuromodulation, antalgic and interferential electrical currents
- 13  
14  
15 156 3. Extracorporeal shock wave therapy
- 16  
17 157 4. Laser therapy
- 18  
19 158 5. Electromagnetic therapy
- 20  
21  
22 159 6. Diathermy
- 23  
24 160 7. Hot thermal agents
- 25  
26 161 8. Cryotherapy
- 27  
28 162 9. Therapeutic ultrasound
- 29  
30

31 163  
32  
33 164 **Supplementary File 2** reported details about each included intervention.

34  
35 165

### 37 166 ***Phase III. Voting of indications through Delphi Rounds***

39  
40 167 We used an electronic Delphi process allowing participants to submit responses anonymously and  
41  
42 168 independently without being biased by other participants' identities and responses. The steering  
43  
44 169 committee sent a blinded electronic voting platform (by a web-based survey) to the panel of experts  
45  
46  
47 170 using the SurveyMonkey online platform (Palo Alto, CA, USA; [www.surveymonkey.com](http://www.surveymonkey.com)).

48  
49 171 The web-based survey consisted of two sections: the first regarded the participants' demographics  
50  
51 172 (e.g., type of profession, the field of expertise, years of experience), and the second covered how to  
52  
53  
54 173 vote for indications. Particularly, the panel of experts evaluated the proposed indications and  
55  
56 174 formulated additional comments using a free text box to ensure complete coverage of the topic.  
57  
58 175 According to the RAND method, for each indication, the panel of experts used a 9-points Likert scale  
59  
60

1  
2  
3 176 (i.e., 1-3 = highly inappropriate, 4-6 = undecided, 7-9 = highly appropriate) for rating the level of  
4  
5 177 concordance.

7  
8 178 In addition, the experts can abstain from voting, selecting the answer "Not my expertise" for  
9  
10 179 indications when they felt not have the appropriate level of expertise to rate.

11  
12 180 A summary of results was provided according to the total number of experts voting as feedback to  
13  
14 181 inform panel members on consensus development with feedback and descriptive statistics  
15  
16 182 incorporated for the next round. Panel of experts were asked to re-rate their evaluation in more rounds  
17  
18 183 only for those indications needing clarification, or for indications for which consensus (i.e.,  $\geq 75\%$  in  
19  
20 184 7-9 points scale or in 1-3 points scale) was not reached.

21  
22 185 Anonymous report of each round was provided to each expert showing the distribution of responses  
23  
24 186 for each indication with all additional comments provided in the free text box. Based on previous  
25  
26 187 voting, indications were modified and presented for the next round. Up to three remind emails for  
27  
28 188 completion were sent to each component individually. Data collection occurred over a 5-month period  
29  
30  
31 189 (June-November 2022).

32  
33 190

#### 34 35 191 ***Phase IV. Workshop Meeting as last round***

36  
37 192 After reaching a consensus, the steering committee joined an online meeting as the last round to refine  
38  
39 193 indications according to each expert contribution and to confirm indications to be included in the final  
40  
41 194 criteria list. Finally, the panel of experts was asked to vote on the final indications list for the closing  
42  
43 195 audit procedure.

44  
45 196

#### 46 47 197 **Definition and calculation of consensus**

48  
49 198 In agreement with the RAND appropriateness method, to inform the development of consensus we  
50  
51 199 adopted predefined criteria<sup>17</sup> assessing the consensus in the Delphi method using the proportion of  
52  
53 200 ratings with a threshold of 75% according to previous review<sup>18</sup>. Particularly:  
54  
55 201

- 1  
2  
3 202 1. Consensus in:  $\geq 75\%$  of participants scored the item as “critical” (score 7 to 9) and  $< 15\%$   
4  
5 203 scored the item as of “limited importance” (score 1 to 3)  
6  
7  
8 204 2. Consensus out:  $\geq 75\%$  of participants scored the item as of “limited importance” (score 1  
9  
10 205 to 3) and  $< 15\%$  scored the item as “critical” (score 7 to 9)  
11  
12 206 3. No consensus: All other results.  
13  
14  
15 207  
16

## 17 208 **Statistical Analysis**

18  
19 209 We used descriptive statistics such as mean and standard deviation (SD), median and interquartile  
20  
21 210 range (IQR) or absolute value and frequency as appropriate to summarize general characteristics of  
22  
23  
24 211 participants and percentage of agreement during the Delphi rounds.  
25

## 26 212

## 28 213 **Role of the Funding Source**

29  
30 214 The work was supported by AIFI. The funder played no role in the design, conduct, or reporting of  
31  
32  
33 215 this study.  
34

## 35 216

## 37 217 **Patient and public involvement**

38  
39 218 One patient representative was involved as expert panellist in this study to rate the indications.  
40  
41  
42 219  
43

## 44 220 **RESULTS**

### 46 221 **Participants**

47  
48  
49 222 Overall, 17 out of 28 (61%) invited STS responded to the questionnaire. The Delphi process flow  
50  
51 223 chart with the STS participants list is reported in **Figure 2**. One expert represented each STS. Most  
52  
53 224 experts were clinicians (88%), with half having expertise in the musculoskeletal field (47%). Experts  
54  
55  
56 225 had a median experience of 30 years (IQR:17-36) in their area of expertise. The general characteristics  
57  
58 226 of the experts included in this study are reported in **Table 1**. No conflict of interest was present  
59  
60 227 (**Appendix 1**).

1  
2  
3 228  
4  
5 229  
6  
7  
8 230  
9  
10 231  
11  
12 232  
13  
14  
15 233  
16  
17 234  
18  
19 235  
20  
21  
22 236  
23  
24 237  
25  
26 238  
27  
28 239  
29  
30  
31 240  
32  
33 241  
34  
35 242  
36  
37  
38 243  
39  
40 244  
41  
42 245  
43  
44 246  
45  
46 247  
47  
48 248  
49  
50  
51 249  
52  
53 250  
54  
55  
56  
57 251  
58  
59  
60

[Figure 2]

[Table 1]

## **Delphi rounds**

Two rounds Delphi were necessary to reach consensus.

### *Round 1*

Overall, 17 experts representing each of the invited STS completed the survey. All indications passed the first round with a consensus out of 75% (**Table 2**). Five experts provided justifications for their choices (e.g., examples of clinical practice) and gave important inputs for some indications. In particular, additional comments regarded concerns about the definition of children and adolescent age, the safety of patients or providers and acceptability. Thus, round 2, was prepared adding specific notes based on suggestions posed: the age to define children and adolescents and the focus on the safety of patients.

[Table 2]

### *Round 2*

Overall, 14 STS (82%) completed the whole survey. All the indications passed the first round with a consensus out of 75%. (**Table 2**). One expert of the panel provided additional comments reporting examples from clinical practice.

### *Workshop Meeting as last round*

1  
2  
3 252 On September 27, 2022 nine STS (53%) joined the online meeting to discuss comments, justifications  
4  
5 253 and highlights. A comprehensive digital presentation of Round 1 and Round 2 findings were reported  
6  
7  
8 254 during the workshop. Indications were finally reworded, as suggested by the participants. In addition,  
9  
10 255 the panel of experts suggested introducing a general note considering different subgroups of the  
11  
12 256 population (e.g., children, adolescents, frail). A final list of indications with a general note was  
13  
14  
15 257 shared in order to reach the final approval through a last round. All STS (100%) approved and released  
16  
17 258 the final indications list of indications. One expert voted the option “Not my expertise” in the  
18  
19 259 indication on the cryotherapy (**Table 2**). In **Appendix 2**, the whole document released for good  
20  
21 260 clinical practice with details of sources (evidence and expertise) and application in different  
22  
23  
24 261 population settings was reported.  
25

26 262

27

28 263

29

30

31 264

32

33 265

34

35 266

36

37 267

38

39

40 268

41

42 269

43

44 270

45

46 271

47

48 272

49

50 273

51

52 274

53

54 275

55

56 276

57

58 277

59

60

## DISCUSSION

This study aimed to develop indications about the safety of PAMs in physical therapy and rehabilitation medicine. These indications were developed by a steering committee (including clinical and methodological experts) of AIFI and informed by 17 national STS with high expertise in different fields related to physiotherapy and rehabilitation (e.g., orthopedics, neurology), including forensic scientists, patients and lay members (e.g., people working with relevant voluntary organizations).

The response rate was moderate with 61% of participation, as suggested by literature<sup>19</sup>. All nine indications were approved in the first round, reaching an important consensus of over 75%, with minor edits on age and fields of applications refined with a second round. After a workshop meeting, a general note was added limiting the use of PAMs to the adult population (>18 years) and all panel experts approved and released the final indications list with overall consensus. In summary, all PAMs proposed are safe to the adult population (>18 years) and can be prescribed and applied by a healthcare provider (e.g., physiotherapist, physician) formed and informed as a requirement from education and licensure<sup>20</sup>. Before proposing PAMs to patients, clinicians have to keep in mind the individual medical history (e.g., comorbidities) during the comprehensive initial examination to better

1  
2  
3 278 determine the diagnosis, prognosis, anticipated goals and expected outcomes for identified  
4  
5 279 impairments, activity limitations and participation restrictions<sup>21</sup>. Thus, following an evidence-based  
6  
7  
8 280 approach, healthcare providers should propose the various efficacious treatment options available  
9  
10 281 according to patients' needs and preferences. In this context, patient should be informed of the  
11  
12 282 potential undesirable effects, especially for the application of PAMs. In particular, in case of ESWT  
13  
14  
15 283 as some expected mild adverse events (e.g., pain, erythema) at the application site can occur <sup>7</sup>.

16  
17 284 For safety purposes, developed indications were not generally extended to other subgroups such as  
18  
19 285 children, adolescents and frail people, since limited and insufficient literature on harms is available.<sup>22</sup>  
20  
21  
22 286 For example, in children and adolescents some PAMs could influence the biological tissues still in  
23  
24 287 the growth phase <sup>23 6, 24</sup>. This population have open growth plates and their ligaments (tissues holding  
25  
26 288 bone to bone) are stronger than the bony attachment sites, where they serve as connectors.

27  
28 289 Thus, adopting safety principle, decision-makers adopt precautionary measures when scientific  
29  
30  
31 290 evidence on harms is uncertain, and the population is vulnerable<sup>25 26, 27</sup> (e.g., populations historically  
32  
33 291 considered at risk for being misused in clinical research or for whom a truly voluntary decision may  
34  
35 292 be compromised from a regulatory perspective such as children or frail people).

36  
37  
38 293 Considering an evidence-based approach, clinicians should balance efficacy and safety, according to  
39  
40 294 patients' preferences. Among all the rehabilitation interventions with demonstrated efficacy<sup>28, 29</sup>,  
41  
42 295 those with trivial adverse events should be encouraged (after informing the patient of the possible  
43  
44  
45 296 occurrence of mild adverse events), whereas those with unknown related harms should not. "*Primum*  
46  
47 297 *non nocere*" is one of the essential ethical principles of medicine; first of all a treatment should not  
48  
49 298 cause harms to the patient<sup>30</sup>.

### 50 51 299 52 53 300 **Implications for clinical practice**

54  
55  
56 301 Good practices for safety of patients should be managed by national agencies with a living monitoring  
57  
58 302 system and shared in international initiatives such as the WHO Global Patient Safety Challenge  
59  
60



1  
2  
3 303 Medication Safety<sup>31</sup> to facilitate the strengthening of systems and practices adopting corrective action  
4  
5 304 within countries.  
6  
7  
8 305 In this context, our consensus could take place into the Good Clinical Practices (GCP) of the Italian  
9  
10 306 Ministry of Health system by Istituto Superiore di Sanità (ISS)<sup>32</sup> for the production of national  
11  
12 307 guidelines and the National Agency for Regional Health Services (Agenzia Nazionale per i Servizi  
13  
14 308 Sanitari Regionali – AGENAS)<sup>33</sup> for reporting any experience of improvement in patient safety made  
15  
16  
17 309 by healthcare organizations.  
18  
19 310 Together with public or private healthcare institutions and organizations and in accordance with  
20  
21 311 recent national legislation on clinical responsibility and safety of treatment<sup>16</sup>, STS must sustain any  
22  
23  
24 312 initiative on safety of interventions, with the largest involvement of stakeholders included patients at  
25  
26 313 first instance. The STS should act as facilitator of dissemination of GCP in different strategies. On  
27  
28 314 one hand STS can promote local experiences of improvement in patient safety stored in shared  
29  
30 315 repository (i.e., AGENAS)<sup>33</sup> on the light of evidence-based consensus (e.g., SAFE PAMP) to  
31  
32 316 facilitate national collaboration between different institutions. On the other hand, STS can  
33  
34  
35 317 disseminate a plain patient-oriented version of good clinical practices indications. We planned to  
36  
37 318 develop patient and stakeholder versions of our evidence-informed and consensus-based indications.  
38  
39  
40 319 We aim to use a conceptual framework based on public health digitalization to put people and patients  
41  
42 320 at the center of care delivery, supporting patient empowerment and making healthcare system more  
43  
44 321 efficient and safer.<sup>34, 35</sup> For example, we can plan stakeholders meetings and webinars, as well as  
45  
46  
47 322 educations and counselling via pamphlets/video/and social messages.  
48  
49 323

### 51 324 **Implications for research**

52  
53 325 We believe that indications developed by the multidisciplinary and multi-professionally panel of  
54  
55 326 experts can be generalized worldwide. These results could provide essential information for Good  
56  
57  
58 327 Clinical Practices for the production of national and international guidelines to improve patient safety  
59  
60 328 and decrease avoidable harms related to interventions. However, in some rehabilitation fields,

1  
2  
3 329 indications about safety were offered only on clinical expertise in the absence of evidence. The  
4  
5 330 absence of evidence is not evidence of absence<sup>36</sup>. Studies should convey their efforts to plan and  
6  
7  
8 331 adequately report adverse events before objectively estimating these harms. The assessment,  
9  
10 332 monitoring and reporting of adverse events should be mandatory in protocols of primary studies, in  
11  
12 333 prospective registration and in public access. This can allow to study data, fulfilling ethical  
13  
14 334 obligations towards patients, and ensuring a basis for fully-informed decision making in the  
15  
16  
17 335 healthcare system. We call for multicentric randomized controlled trials based on the core outcome  
18  
19 336 set also for harms and not only for benefit<sup>37</sup>.

20  
21 337 As well, specific subgroups of populations should be studied. It is a serious matter to exclude a group  
22  
23  
24 338 from research eligibility, and this must be done only when no less restrictive option is sufficient to  
25  
26 339 ensure protection from undue risk. Deciding to exclude certain groups from studies to protect them  
27  
28 340 from the risks inherent in clinical research, investigators take away patients' right to decide the  
29  
30  
31 341 desirable participation in research.<sup>38</sup>

32  
33 342 In addition, future studies can better explore our indications to ensure the optimal modality  
34  
35 343 application of the proposed PAMs (e.g., optimal voltage, amperage, frequency, current density, dose)  
36  
37  
38 344 especially for the subgroups mentioned above where therapies should be proposed according to  
39  
40 345 population-specific characteristics (e.g., age of children).<sup>39</sup>

## 41 42 346 43 44 347 **Limitations**

45  
46  
47 348 This is the first effort to develop indications on the safety of PAMs in physiotherapy and  
48  
49 349 rehabilitation. We strictly followed published guidelines for reporting and conduction. In addition,  
50  
51 350 we a-priori publicly registered (<https://osf.io/w8kgs>) the consensus criterion used to determine  
52  
53  
54 351 agreement within the Delphi process<sup>17, 40</sup>.

55  
56 352 Indications from this study have a solid scientific background and external validity since they were  
57  
58 353 developed according to a previous evidence based scoping review<sup>7, 8</sup> (protocol stored at  
59  
60 354 <https://osf.io/6vx5a/>) and discussed by large groups of experts with various backgrounds, including

1  
2  
3 355 lay member and patients. The panel of experts, as occurs in clinical practice guidelines, declared their  
4  
5 356 interests to inspect any possible related conflict of interest.  
6  
7  
8 357 Some limitations should be acknowledged. We used a consensus threshold of 75% even if the  
9  
10 358 definition varies widely in the literature and it is poorly reported.<sup>18</sup> However, our threshold was one  
11  
12 359 of the most conservative and in all rounds the consensus was reached with high percentage of  
13  
14 360 agreements.

15  
16  
17 361 In addition, even if PAMs were found to be safe in this consensus, we did not exclude that some  
18  
19 362 patients could experience mild adverse events (e.g., bruising, muscle soreness) that can be  
20  
21 363 underestimated considering the real-world data (RWD) relating to patient health status. Patients  
22  
23 364 experiences of adverse events should be collected in public dataset of RWD from electronic health  
24  
25 365 records and insurance claims<sup>41</sup>. However, the analysis of RWD requires special vigilance to prevent  
26  
27 366 data users from drawing unjustified conclusions not supported by data, based on spurious correlations  
28  
29 367 <sup>41</sup>. Some initiatives across countries exists such as the Food and Drug Administration (FDA)  
30  
31 368 repository for the reporting of adverse events related to FDA-approved devices<sup>42</sup> and the European  
32  
33 369 database on medical devices (EUDAMED) to access information for the public and healthcare  
34  
35 370 professionals<sup>43</sup>.

36  
37  
38 371 Accelerating and standardize national and international medical device regulation can promote an  
39  
40 372 efficient and effective regulatory model for medical devices responsive to emerging challenges while  
41  
42 373 protecting and maximizing public health and safety<sup>44</sup>  
43  
44  
45  
46

## 47 374 48 49 375 **CONCLUSION**

50  
51 376 These evidence-based indications inform patients, healthcare providers and policy-makers regarding  
52  
53 377 the safety of a wide range PAMs used in physiotherapy and rehabilitation after a comprehensive  
54  
55 378 clinical evaluation of patients' needs. This consensus can provide a basis for decision-making and  
56  
57 379 future research on this field.  
58  
59  
60

380

1  
2  
3  
4  
5  
6  
7  
8  
9  
10  
11  
12  
13  
14  
15  
16  
17  
18  
19  
20  
21  
22  
23  
24  
25  
26  
27  
28  
29  
30  
31  
32  
33  
34  
35  
36  
37  
38  
39  
40  
41  
42  
43  
44  
45  
46  
47  
48  
49  
50  
51  
52  
53  
54  
55  
56  
57  
58  
59  
60

## 381 **DECLARATIONS**

### 382 **Author Contributions**

383 Concept/idea/research design: S. Gianola, S. Bargerì, G. Castellini

384 Writing: S. Gianola, S. Bargerì, G. Castellini

385 Data collection: S. Gianola, S. Bargerì

386 Data analysis: S. Gianola, S. Bargerì

387 Project management: S. Gianola, S. Bargerì

388 Consultation (including review of manuscript before submitting): S. Gianola, S. Bargerì, L.

389 Pellicciari, S. Gambazza, G. Rossetini, A. Fulvio, V. Genovese, M. Benedini, E. Proverbio, S.

390 Cecchetto, G. Castellini, A. Turolla, and SAFE PAMP Collaborators

### 392 **Ethics Approval**

393 This study was declared exempt from institutional review board review

### 395 **Disclosures**

396 The authors declared they had no conflicts of interest.

### 398 **Funding**

399 The work was supported by AIFI. The funder played no role in the design, conduct, or reporting of  
400 this study.

### 402 **Data sharing statement**

403 Research data are stored in OSF repository <https://osf.io/w8kgs/>

405 **Manuscript word count:** 3259/4000

406 **Figure 1.** Phases of the RAND Delphi process

1  
2  
3  
4  
5  
6  
7  
8  
9  
10  
11  
12  
13  
14  
15  
16  
17  
18  
19  
20  
21  
22  
23  
24  
25  
26  
27  
28  
29  
30  
31  
32  
33  
34  
35  
36  
37  
38  
39  
40  
41  
42  
43  
44  
45  
46  
47  
48  
49  
50  
51  
52  
53  
54  
55  
56  
57  
58  
59  
60

407 **Figure 2.** Flow chart of Delphi process

408 **Table 1.** General characteristics of experts

409 **Table 2.** Agreement results for each round

For peer review only

1  
2  
3 410 **REFERENCES**  
4

- 5 411 1. McCann J, Roy C, Ward C. Rehabilitation medicine  
6 412 <https://www.bsrm.org.uk/downloads/rehabilitationmedicine-final.pdf>.  
7 413 2. World Health Organization. WHO International classification of functioning, disability and  
8 414 health (ICF). Geneva: WHO, 2007. [www.who.int/classifications/icf/en/](http://www.who.int/classifications/icf/en/) [Accessed 28 June  
9 415 2011]. 4 Royal College of Physicians.  
10 416 3. Long-term neurological conditions: management at the interface between neurology,  
11 417 rehabilitation and palliative care. National guidelines. Concise guidance series No 10.  
12 418 London: RCP, 2008.  
13 419 4. Cameron M. *Physical Agents in Rehabilitation*  
14 420 *An Evidence-Based Approach to Practice*. 5th Edition ed: Elsevier; 2016.  
15 421 5. Carlesso LC, Macdermid JC, Santaguida LP. Standardization of adverse event terminology  
16 422 and reporting in orthopaedic physical therapy: application to the cervical spine. *J Orthop*  
17 423 *Sports Phys Ther*. Aug 2010;40(8):455-463.  
18 424 6. ELECTROPHYSICAL AGENTS - Contraindications And Precautions: An Evidence-Based  
19 425 Approach To Clinical Decision Making In Physical Therapy. *Physiother Can*. Fall  
20 426 2010;62(5):1-80.  
21 427 7. Bargerì S, Pellicciari L. Rischio clinico nell'uso di terapie fisiche. Revisione sistematica  
22 428 della letteratura. [https://aifi.net/wp-](https://aifi.net/wp-content/uploads/2022/05/Documento_AIFI_EventiAvversi_publicazione-.pdf)  
23 429 [content/uploads/2022/05/Documento\\_AIFI\\_EventiAvversi\\_publicazione-.pdf](https://aifi.net/wp-content/uploads/2022/05/Documento_AIFI_EventiAvversi_publicazione-.pdf). 2022  
24 430 8. Bargerì S., Pellicciari L., Gallo C., et al. What is the landscape of evidence about safety of  
25 431 physical agents used in physical medicine and rehabilitation? A scoping review. *BMJ Open*.  
26 432 *Under review*.  
27 433 9. Moher D, Schulz KF, Simera I, Altman DG. Guidance for developers of health research  
28 434 reporting guidelines. *PLoS Med*. Feb 16 2010;7(2):e1000217.  
29 435 10. Hasson F, Keeney S, McKenna H. Research guidelines for the Delphi survey technique. *J*  
30 436 *Adv Nurs*. Oct 2000;32(4):1008-1015.  
31 437 11. Junger S, Payne SA, Brine J, Radbruch L, Brearley SG. Guidance on Conducting and  
32 438 REporting DELphi Studies (CREDES) in palliative care: Recommendations based on a  
33 439 methodological systematic review. *Palliat Med*. Sep 2017;31(8):684-706.  
34 440 12. European Commission.  
35 441 [https://ec.europa.eu/research/participants/data/ref/h2020/grants\\_manual/hi/ethics/h2020\\_hi-](https://ec.europa.eu/research/participants/data/ref/h2020/grants_manual/hi/ethics/h2020_hi-ethics-data-protection_en.pdf)  
36 442 [ethics-data-protection\\_en.pdf](https://ec.europa.eu/research/participants/data/ref/h2020/grants_manual/hi/ethics/h2020_hi-ethics-data-protection_en.pdf) Accessed on March 5 2020. accessed on May 19 2020.  
37 443 13. Akins RB, Tolson H, Cole BR. Stability of response characteristics of a Delphi panel:  
38 444 application of bootstrap data expansion. *BMC Med Res Methodol*. Dec 1 2005;5:37.  
39 445 14. Birko S, Dove ES, Ozdemir V. Evaluation of Nine Consensus Indices in Delphi Foresight  
40 446 Research and Their Dependency on Delphi Survey Characteristics: A Simulation Study and  
41 447 Debate on Delphi Design and Interpretation. *PLoS One*. 2015;10(8):e0135162.  
42 448 15. Legge 8 marzo 2017, n. 24 Disposizioni in materia di sicurezza delle cure e della persona  
43 449 assistita, nonché in materia di responsabilità professionale degli esercenti le professioni  
44 450 sanitarie. <https://www.gazzettaufficiale.it/eli/id/2017/03/17/17G00041/sg> Accessed on  
45 451 April, 12 2022.  
46 452 16. Ministero Della Salute. Elenco delle società scientifiche e associazioni tecnico- scientifiche  
47 453 delle professioni sanitarie ai sensi del dm 2 agosto 2017  
48 454 [https://www.salute.gov.it/portale/temi/documenti/Elenco\\_societa\\_scientifiche\\_Aggiornato](https://www.salute.gov.it/portale/temi/documenti/Elenco_societa_scientifiche_Aggiornato_26_gennaio_2022_411_cambio_denominazione_AIFI_SIDCO_SIdP_(003).pdf)  
49 455 [26\\_gennaio\\_2022\\_411\\_cambio\\_denominazione\\_AIFI\\_SIDCO\\_SIdP\\_\(003\).pdf](https://www.salute.gov.it/portale/temi/documenti/Elenco_societa_scientifiche_Aggiornato_26_gennaio_2022_411_cambio_denominazione_AIFI_SIDCO_SIdP_(003).pdf) Accessed  
50 456 Accessed on April, 12 2022.  
51 457 17. Grant S, Booth M, Khodyakov D. Lack of preregistered analysis plans allows unacceptable  
52 458 data mining for and selective reporting of consensus in Delphi studies. *J Clin Epidemiol*. Jul  
53 459 2018;99:96-105.



1

2

3 460

4 461

5 462

6 463

7 464

8 465

9 466

10 467

11 468

12 469

13 470

14 471

15 472

16 473

17 474

18 475

19 476

20 477

21 478

22 479

23 480

24 481

25 482

26 483

27 484

28 485

29 486

30 487

31 488

32 489

33 490

34 491

35 492

36 493

37 494

38 495

39 496

40 497

41 498

42 499

43 500

44 501

45 502

46 503

47 504

48 505

49 506

50 507

51 508

52 509

53 510

54 510

55 510

56 510

57 510

58 510

59 510

60 510

18. Diamond IR, Grant RC, Feldman BM, et al. Defining consensus: a systematic review recommends methodologic criteria for reporting of Delphi studies. *J Clin Epidemiol*. Apr 2014;67(4):401-409.
19. Fincham JE. Response rates and responsiveness for surveys, standards, and the Journal. *Am J Pharm Educ*. Apr 15 2008;72(2):43.
20. McGauran N, Wieseler B, Kreis J, Schuler YB, Kolsch H, Kaiser T. Reporting bias in medical research - a narrative review. *Trials*. Apr 13 2010;11:37.
21. WCPT. Standards of physical therapy practice <https://world.physio/sites/default/files/2020-07/G-2011-Standards-practice.pdf>.
22. Yeom M, Kim SH, Lee B, et al. Effects of laser acupuncture on longitudinal bone growth in adolescent rats. *Evid Based Complement Alternat Med*. 2013;2013:424587.
23. National Research Council (US) Panel to Review the Status of Basic Research on School-Age Children; Collins WA eDDMCTYFStT.
24. Brooks GP, Hergenroeder MAC. Musculoskeletal injury in children and skeletally immature adolescents: Overview of treatment principles for nonoperative injuries. *Up to date*. 2020:1-15.
25. European Parliament. The precautionary principle: Definitions, applications and governance [https://www.europarl.europa.eu/thinktank/en/document/EPRS\\_IDA\(2015\)573876](https://www.europarl.europa.eu/thinktank/en/document/EPRS_IDA(2015)573876).
26. Commission. E. The precautionary principle: decision making under uncertainty. [https://ec.europa.eu/environment/integration/research/newsalert/pdf/precautionary\\_principle\\_decision\\_making\\_under\\_uncertainty\\_FB18\\_en.pdf](https://ec.europa.eu/environment/integration/research/newsalert/pdf/precautionary_principle_decision_making_under_uncertainty_FB18_en.pdf). 2017;accessed on July 4 2020.
27. World Commission on the Ethics of Scientific Knowledge T. The precautionary principle. 2005.
28. Castellini G, Pillastrini P, Vanti C, et al. Some conservative interventions are more effective than others for people with chronic non-specific neck pain: a systematic review and network meta-analysis. *J Physiother*. Oct 2022;68(4):244-254.
29. Gianola S, Bargerì S, Del Castillo G, et al. Effectiveness of treatments for acute and subacute mechanical non-specific low back pain: a systematic review with network meta-analysis. *Br J Sports Med*. Jan 2022;56(1):41-50.
30. Sackett DL, Rosenberg WM, Gray JA, Haynes RB, Richardson WS. Evidence based medicine: what it is and what it isn't. *Bmj*. Jan 13 1996;312(7023):71-72.
31. Medication Without Harm - Global Patient Safety Challenge on Medication Safety. Geneva: World Health Organization, 2017. Licence: CC BY-NC-SA 3.0 IGO.
32. SNLG dell'Istituto Superiore di Sanità. Buone Pratiche. <https://snlg.iss.it/?cat=4>.
33. AGENAS. Agenzia Nazionale per i Servizi Sanitari Regionali <https://www.agenas.gov.it/comunicazione/primo-piano/2111-avvio-call-for-good-practice-2022>.
34. Odone A, Buttigieg S, Ricciardi W, Azzopardi-Muscat N, Staines A. Public health digitalization in Europe. *Eur J Public Health*. Oct 1 2019;29(Supplement\_3):28-35.
35. Santesso N, Morgano GP, Jack SM, et al. Dissemination of Clinical Practice Guidelines: A Content Analysis of Patient Versions. *Med Decis Making*. Aug 2016;36(6):692-702.
36. Alderson P. Absence of evidence is not evidence of absence. Vol 328: British Medical Journal Publishing Group; 2004:476-477.
37. COMET Initiative <https://www.comet-initiative.org/Resources/AdverseEventOutcomes> (Accessed on April 5, 2022).
38. Langford A, Bateman-House A. Clinical trials for COVID-19: Populations most vulnerable to COVID-19 must be included. *Health Affairs Blog*. Retrieved December. 2020;1.
39. Thabet AA, Ebid AA, El-Boshy ME, et al. Pulsed high-intensity laser therapy versus low level laser therapy in the management of primary dysmenorrhea. *J Phys Ther Sci*. Sep 2021;33(9):695-699.

1  
2  
3  
4  
5  
6  
7  
8  
9  
10  
11  
12  
13  
14  
15  
16  
17  
18  
19  
20  
21  
22  
23  
24  
25  
26  
27  
28  
29  
30  
31  
32  
33  
34  
35  
36  
37  
38  
39  
40  
41  
42  
43  
44  
45  
46  
47  
48  
49  
50  
51  
52  
53  
54  
55  
56  
57  
58  
59  
60

- 511 **40.** De Meyer D, Kottner J, Beele H, et al. Delphi procedure in core outcome set development:  
512 rating scale and consensus criteria determined outcome selection. *J Clin Epidemiol*. Jul  
513 2019;111:23-31.
- 514 **41.** Lipworth W. Real-world Data to Generate Evidence About Healthcare Interventions. *Asian*  
515 *Bioethics Review*. 2019/09/01 2019;11(3):289-298.
- 516 **42.** FDA Adverse Event Reporting System (FAERS) Electronic Submissions  
517 [https://www.fda.gov/drugs/questions-and-answers-fdas-adverse-event-reporting-system-](https://www.fda.gov/drugs/questions-and-answers-fdas-adverse-event-reporting-system-faers/fda-adverse-event-reporting-system-faers-electronic-submissions)  
518 [faers/fda-adverse-event-reporting-system-faers-electronic-submissions](https://www.fda.gov/drugs/questions-and-answers-fdas-adverse-event-reporting-system-faers/fda-adverse-event-reporting-system-faers-electronic-submissions) Accessed on August,  
519 30, 2022.
- 520 **43.** EUDAMED - European Database on Medical Devices  
521 <https://ec.europa.eu/tools/eudamed/#/screen/home> Accessed on August 30, 2022.
- 522 **44.** International Medical Device Regulators Forum <https://www.imdrf.org> Accessed on August  
523 30, 2022.

For peer review only



525 **Tables**

526

**Table 1. General characteristics of experts**

| <b>Professional profile*</b> | <b>Responses (N=17)</b> |
|------------------------------|-------------------------|
| Clinicians                   | 88.0%                   |
| Researchers                  | 41.0%                   |
| Management                   | 23.5%                   |
| <b>Field of expertise*</b>   |                         |
| Musculoskeletal              | 47.0%                   |
| Pelvic floor disorders       | 23.5%                   |
| Neurological                 | 18.0%                   |
| Lymphatic disorders          | 6.0%                    |
| Other**                      | 35.3%                   |

\*more than one answer was possible

\*\* e.g, lay or forensic members

530 **Table 2. Agreement results for each round**

| Indications about safety of...                                   | ROUND 1                                                  |                                                             | ROUND 2                                                  |                                                             | FINAL LIST |     |
|------------------------------------------------------------------|----------------------------------------------------------|-------------------------------------------------------------|----------------------------------------------------------|-------------------------------------------------------------|------------|-----|
|                                                                  | Percentage of agreement (7-9 points on the Likert scale) | Percentage of disagreement (1-3 points on the Likert scale) | Percentage of agreement (7-9 points on the Likert scale) | Percentage of disagreement (1-3 points on the Likert scale) | Approved   | NME |
| Electrical stimulation                                           | 85.7                                                     | 7.1                                                         | 85.7                                                     | 0.0                                                         | 100.0      | 0.0 |
| Neuromodulation, antalgic and interferential electrical currents | 100.0                                                    | 0.0                                                         | 100.0                                                    | 0.0                                                         | 100.0      | 0.0 |
| Extracorporeal shock wave therapy                                | 83.3                                                     | 0.0                                                         | 76.9                                                     | 0.0                                                         | 100.0      | 0.0 |
| Laser therapy                                                    | 84.6                                                     | 7.7                                                         | 90.9                                                     | 0.0                                                         | 100.0      | 0.0 |
| Electromagnetic therapy                                          | 81.8                                                     | 9.1                                                         | 76.9                                                     | 0.0                                                         | 100.0      | 0.0 |
| Diathermy                                                        | 90.0                                                     | 10.0                                                        | 84.6                                                     | 0.0                                                         | 100.0      | 0.0 |
| Hot thermal agents                                               | 81.8                                                     | 9.1                                                         | 91.7                                                     | 0.0                                                         | 100.0      | 0.0 |
| Cryotherapy                                                      | 75.0                                                     | 0.0                                                         | 90.9                                                     | 0.0                                                         | 94.2       | 5.8 |
| Therapeutic ultrasound                                           | 90.9                                                     | 0.0                                                         | 91.7                                                     | 0.0                                                         | 100.0      | 0.0 |
| General note^                                                    | -                                                        | -                                                           | -                                                        | -                                                           | 100.0      | 0.0 |

531 ^added for the Final Criteria List

532 Abbreviations: NME: not my expertise

533 **Appendix 1. SAFE PAMP Collaborators**

| <b>Name and Surname</b> | <b>Affiliation</b>                                                                                                               | <b>STS</b>                                                                                                                                                                  | <b>COI</b> |
|-------------------------|----------------------------------------------------------------------------------------------------------------------------------|-----------------------------------------------------------------------------------------------------------------------------------------------------------------------------|------------|
| <b>Armando Perrotta</b> | IRCCS Neuromed,<br>Pozzilli (IS)                                                                                                 | Società Italiana per lo Studio delle<br>Cefalee (SISC)                                                                                                                      | none       |
| <b>Viviana Rosati</b>   | A.U.O. Policlinico<br>Umberto I                                                                                                  | Società Italiana di Riabilitazione<br>Neurologica (SIRN)                                                                                                                    | none       |
| <b>Enrico Marinelli</b> | Department of<br>Anatomical,<br>Histological,<br>Forensic, and<br>Orthopedic<br>Sciences,<br>"Sapienza"<br>University of<br>Rome | Società Italiana di Medicina<br>Legale e delle Assicurazioni<br>(SIMLA) - Dipartimento di<br>Scienze Biotecnologiche e<br>Medico-chirurgiche Università di<br>Roma Sapienza | none       |
| <b>Bianca Masturzo</b>  | Obstetrics and<br>Gynecology<br>department.<br>Ospedale degli<br>infermi. Ponderano<br>(Biella)                                  | Associazione degli Ostetrici e<br>Ginecologi Ospedalieri Italiani<br>(AOGOI)                                                                                                | none       |

|                                |                                                                                                                                              |                                                                                    |      |
|--------------------------------|----------------------------------------------------------------------------------------------------------------------------------------------|------------------------------------------------------------------------------------|------|
| <b>Mauro Roselli</b>           | ASL<br>CittadiTorino-<br>Ospedale Martini-<br>S.C. Ortopedia e<br>Traumatologia                                                              | Ortopedici Traumatologi<br>Ospedalieri d'Italia (OTODI)                            | none |
| <b>Stefano Vercelli</b>        | Laboratorio di<br>Ricerca in<br>Riabilitazione<br>2rLab,<br>Dipartimento<br>Economia<br>Aziendale, Sanità e<br>Sociale. SUPSI.<br>Manno (CH) | Federazione Italiana delle<br>Associazione Scientifiche di<br>Fisioterapia (FIASF) | none |
| <b>Gianmarco Rea</b>           | Asl Latina, 04100<br>Latina, Italy                                                                                                           | Società Italiana di Medicina<br>Generale e delle Cure Primarie<br>(SIMG)           | none |
| <b>Gianfranco<br/>Lamberti</b> | Dipartimento<br>Medicina<br>Riabilitativa AUSL<br>Piacenza                                                                                   | Società Italiana di Urodinamica<br>(SIUD)                                          | none |
| <b>Roberto Bortolotti</b>      | UO Reumatologia<br>Ospedale S.Chiera,<br>Trento                                                                                              | Società Italiana di Reumatologia<br>(SIR)                                          | none |

|                               |                                                                                                                  |                                                                                    |      |
|-------------------------------|------------------------------------------------------------------------------------------------------------------|------------------------------------------------------------------------------------|------|
| <b>Chiara Torresetti</b>      | Paideia<br>International<br>Hospital                                                                             | Associazione Italiana di Urologia<br>Ginecologia e del Pavimento<br>Pelvico (AIUG) | none |
| <b>Fabio Bandini</b>          | Department of<br>Neurology, ASL 3<br>Genovese, Genova,<br>Italy                                                  | Società Italiana Neurologia (SIN)                                                  | none |
| <b>Giuseppe Botta</b>         | Istituto<br>Fisioterapico<br>Michelangelo di<br>Arezzo                                                           | Società Italiana di Flebolinfologia<br>(SIFL)                                      | none |
| <b>Giancarlo<br/>Tancredi</b> | Pediatric<br>Department.<br>Sapienza<br>Università di Roma                                                       | Società Italiana di Pediatria (SIP)                                                | none |
| <b>Luigi Nappi</b>            | Department of<br>Medical and<br>Surgical Sciences<br>Policlinico Riuniti<br>di Foggia<br>UNIVERSITY OF<br>FOGGIA | Società Italiana Di Ginecologia E<br>Ostetricia (SIGO)                             | none |
| <b>Marco Scorcu</b>           | Servizio di<br>Medicina dello<br>Sport e                                                                         | Federazione Medico Sportiva<br>Italiana (FMSI)                                     | none |

|                           |                                                                                                                                                |                                                               |      |
|---------------------------|------------------------------------------------------------------------------------------------------------------------------------------------|---------------------------------------------------------------|------|
|                           | dell'Esercizio<br>Fisico, Cagliari,<br>ATS Sardegna,<br>Cagliari, Italy                                                                        |                                                               |      |
| <b>Monica Pierattelli</b> | Presidente SICuPP<br>Toscana, Pediatra<br>di libera scelta<br>Campi Bisenzio<br>(FI)                                                           | Societa' Italiana Delle Cure<br>Primarie Pediatriche (SICuPP) | none |
| <b>Carla Berliri</b>      | Cittadinanzattiva-<br>APS - Sede<br>Nazionale -Staff<br>area Salute -<br>Tribunale per i<br>Diritti del Malato -<br>Politiche della<br>Salute- | Cittadinanzattiva - APS                                       | none |

534

535 Legend: COI, Conflict of Interest; STS, Scientific and Technical Societies

1  
2  
3  
4  
5  
6  
7  
8  
9  
10  
11  
12  
13  
14  
15  
16  
17  
18  
19  
20  
21  
22  
23  
24  
25  
26  
27  
28  
29  
30  
31  
32  
33  
34  
35  
36  
37  
38  
39  
40  
41  
42  
43  
44  
45  
46  
47  
48  
49  
50  
51  
52  
53  
54  
55  
56  
57  
58  
59  
60

## 536 **Appendix 2. Final criteria list**

### 537 **1. Electrical stimulation (e.g., Functional electrical stimulation (FES), Neuromuscular** 538 **electrical stimulation (NMES), Electrical muscle stimulation (EMS)) is safe in the adult** 539 **population**

540 *- in musculoskeletal disorders, especially in the following conditions:*

541 o Evidence: neck pain, knee osteoarthritis, musculoskeletal pain, muscle hypotrophy.

542 o Expertise: spinal osteoarthritis, knee osteoarthritis, musculoskeletal pain, knee  
543 osteoarthritis, muscle and joint pain.

544 *- in pelvis-perineal disorders, especially in the following conditions:*

545 o Evidence: urinary incontinence, faecal incontinence, lower urinary tract symptoms in  
546 postpartum women, overactive bladder.

547 o Expertise: prolapse, descending perineum syndrome, perineal hypotonia, bladder-sphincter  
548 or anorectal dyssynergia, erectile dysfunction, premature ejaculation, abdominal diastasis.

549 *- in neurological disorders, especially in the following conditions:*

550 o Evidence: migraine, spasticity in multiple sclerosis, stroke, spinal cord injury.

551 o Expertise: post-stroke urinary incontinence, neurogenic bowel dysfunction in spinal cord  
552 injury, second motor neuron disease (e.g., Amyotrophic Lateral Sclerosis), muscular  
553 dystrophies, head trauma, lesions of the peripheral nervous system.

554

1  
2  
3 555 **2. Neuromodulation, antalgic and interferential electrical currents (e.g., TransCutaneous**  
4  
5 556 **Electrical Nerve Stimulation (TENS), Transcutaneous Tibialis Posterior Stimulation (TTNS))**  
6  
7  
8 557 **are safe in the adult population**  
9

10  
11 558 *- in musculoskeletal disorders, especially in the following conditions:*  
12

13  
14  
15 559 *o Evidence: low back pain, neck pain, rotator cuff disease, whiplash-associated disorders,*  
16  
17 560 *fibromyalgia.*

18  
19  
20 561 *o Expertise: musculoskeletal pain, spine osteoarthritis, neuropathic pain.*  
21  
22

23  
24 562 *- in pelvis-perineal disorders, especially in the following conditions:*  
25

26  
27 563 *o Evidence: overactive bladder, urinary incontinence, faecal incontinence, persistent pelvic*  
28  
29 564 *pain.*

30  
31  
32  
33 565 *o Expertise: Urinary incontinence, pudendal neuralgia, constipation, urinary retention.*  
34  
35

36  
37 566 *- in neurological disorders, especially in the following conditions:*  
38

39  
40 567 *o Evidence: neuropathic pain, stroke, multiple sclerosis, neurogenic bowel dysfunction after*  
41  
42 568 *spinal cord injury.*

43  
44  
45  
46 569 *o Expertise: neurogenic bladder dysfunction after central and peripheral nervous system*  
47  
48 570 *injuries.*  
49

50  
51  
52 571

53  
54  
55 572 **3. Extracorporeal shock wave therapy (radial and focal) is safe in the adult population**  
56  
57

58  
59 573 *- in musculoskeletal disorders, especially in the following conditions:*  
60



- 1  
2  
3 574 o Evidence: soft tissue disorders of the lower limbs, knee tendinopathy, Achilles  
4  
5 575 tendinopathy, osteoarthritis, plantar fasciitis, rotator cuff disease, shoulder tendinopathy and  
6  
7  
8 576 calcifications, acute fracture, orthopedic disorders, consolidation delays, other soft tissue  
9  
10 577 disorders.
- 11  
12  
13 578 o Expertise: enthesopathies of the upper and lower limbs, calcifications, epicondylitis,  
14  
15  
16 579 epitrocleitis, muscle injuries, muscle contractures and trigger points.
- 17  
18  
19 580 - in neurological disorders, especially in the following conditions:  
20  
21  
22  
23 581 o Evidence: post-stroke lower limb spasticity, multiple sclerosis spasticity.  
24  
25  
26 582 o Expertise: spasticity following head trauma, spasticity following spinal cord injury.  
27  
28  
29  
30 583 - in pelvis-perineal disorders, especially in the following conditions:  
31  
32  
33 584 o Evidence: chronic prostatitis/chronic pelvic pain syndrome.  
34  
35  
36  
37 585 o Expertise: persistent female pelvic pain, Peronye disease.  
38  
39
- 40 586 Patients should be informed of the potential undesirable effects after applying ESWT. Indeed, a  
41  
42 587 recent literature review showed some expected mild adverse events, such as pain and erythema, at  
43  
44  
45 588 the application site<sup>7</sup>.
- 46  
47  
48 589  
49  
50  
51  
52 590 **4. Laser therapy (e.g., low level laser therapy (LLLT), high level laser therapy (HLLT)) is safe**  
53  
54 591 **in the**  
55  
56 592 **adult population**  
57  
58  
59  
60 593 - in musculoskeletal disorders, especially in the following conditions:

1  
2  
3 594 o Evidence: low back pain, Achilles tendinopathy, rotator cuff disease, capsulitis adhesive,  
4  
5 595 lower extremity soft tissue disorders, frozen shoulder, carpal tunnel syndrome, knee  
6  
7  
8 596 osteoarthritis, neck pain, whiplash associated disorders.  
9

10  
11 597 o Expertise: upper and lower limb tendinopathy, acute arthropathy, acute muscle and tendon  
12  
13 598 injuries, acute musculoskeletal pain. Upper and lower limb tendinopathy, acute arthropathy,  
14  
15 599 acute muscle and tendon injury, and acute musculoskeletal pain.  
16  
17

18  
19 600 - *in pelvis-perineal disorders (extracavitary LLLT only), especially in the following conditions:*  
20  
21

22  
23 601 o Evidence: Urinary incontinence and pelvic organ prolapse, persistent pelvic pain.  
24  
25

26 602 o Expertise: healing (episiotomies, laparotomies, lacerations, etc.), inflammatory pelvic  
27  
28 603 pain, edema or perineal hematomas.  
29  
30

31  
32 604 - *in lymphatic disorders (LLLT only), especially in the following conditions:*  
33  
34

35 605 o Evidence: secondary lymphoedema (e.g., breast cancer-related lymphedema).  
36  
37

38  
39 606 o Expertise: lymphoedema  
40  
41

42 607 - *in neurological disorders (LLLT only), especially in the following conditions:*  
43  
44

45  
46 608 o Evidence: Bell's palsy  
47  
48

49 609 o Expertise: stroke, multiple sclerosis, spinal cord injury, head trauma, peripheral nerve  
50  
51 610 injury.  
52  
53

54  
55 611 **5. Electromagnetic therapy (e.g., Pulsed ElectroMagnetic Field Therapy (PEMFT), repetitive**  
56  
57 612 **Peripheral Magnetic Stimulation (rPMS)) is safe in the adult population**  
58  
59

60  
613 - *in musculoskeletal disorders, especially in the following conditions:*

1

2

3 614 o Evidence: neck pain, fractures, consolidation delays.

4

5

6 615 o Expertise: osteoporosis, bone oedema, algodystrophy, arthrosis.

8

9

10 616 - in pelvis-perineal disorders, especially in the following conditions:

11

12

13

14 617 o Evidence: persistent pelvic pain and urinary incontinence.

15

16

17 618 o Expertise: faecal incontinence, prolapse, descending perineum syndrome, perineal

18

19 619 hypotonia, vesicico-sphincteric or anorectal dyssynergia, pudendal neuralgia, pelvic pain

20

21

22 620 acute, erectile dysfunction, premature ejaculation, diastasis recti.

23

24

## 25 621 **6. Diathermy (e.g., Short Wave Tecar Therapy) is safe in the adult population**

26

27

28

29 622 - in musculoskeletal disorders, especially in the following conditions:

30

31

32 623 o Evidence: rotator cuff disease, knee osteoarthritis.

33

34

35 624 o Expertise: sub-acute/persistent muscle injuries, DOMS/DOMER, arthropathies (non-

36

37

38 625 acute), osteoarthritis, muscle contractures, trigger points.

39

40

41 626 - in pelvis-perineal disorders, especially in the following conditions:

42

43

44

45 627 o Evidence: inflammatory pelvic pain, persistent pelvic pain, sexual dysfunction (Peronye's  
46 628 disease).

48

49

50 629 o Expertise: prolapse, stress urinary incontinence, scarring (episiotomies, laparotomies,

51

52

53 630 lacerations, etc.), perineal edema or hematoma, vulvovaginal dystrophy and dryness,

54

55

56

57

58

## 59 632 **7. Hot thermal agent modalities (e.g., drug-free heatwrap) are safe in the adult population**

60

1  
2  
3 633 - *in musculoskeletal disorders, especially in the following conditions:*

4  
5  
6 634 o Evidence: groin pain, low back pain.

7  
8  
9  
10 635 o Expertise: sub-acute/persistent muscle injuries, DOMS/DOMER, arthropathies (non-  
11  
12 636 acute), osteoarthritis

13  
14  
15  
16 637  
17  
18  
19 638 **8. Cryotherapy (e.g, ice or liquid nitrogen) is safe in the adult population**

20  
21  
22  
23 639 - *in musculoskeletal disorders, especially in the following conditions:*

24  
25  
26 640 o Evidence: arthroscopy, reconstruction of the anterior cruciate ligament, post-surgery.

27  
28  
29  
30 641 o Expertise: Delayed Onset Muscle Soreness (DOMS)/Delayed Onset Muscle Soreness  
31  
32 642 (DOMER), post-surgery, post trauma (48h).

33  
34  
35 643  
36  
37  
38  
39 644 **9. Therapeutic Ultrasound is safe in the adult population**

40  
41  
42 645 - *in musculoskeletal disorders, especially in the following conditions:*

43  
44  
45  
46 646 o Evidence: back pain, neck pain, carpal tunnel, rotator cuff disorder, lower limb soft-tissue  
47  
48 647 disorder, knee osteoarthritis, fracture, acute fracture, ankle fracture, ankle and knee sprains,

49  
50  
51 648 o Expertise: hand and foot osteoarthritis, calcifications, enthesitis.

52  
53  
54  
55 649 **General note and considerations related to subgroups:**

56  
57  
58 650 Following a confirmed clinical prescription, the applications of the above physical therapies are safe  
59  
60  
61 in the adult population (>18 years) under the supervision of an expert operator. For precautionary

1  
2  
3  
4  
5  
6  
7  
8  
9  
10  
11  
12  
13  
14  
15  
16  
17  
18  
19  
20  
21  
22  
23  
24  
25  
26  
27  
28  
29  
30  
31  
32  
33  
34  
35  
36  
37  
38  
39  
40  
41  
42  
43  
44  
45  
46  
47  
48  
49  
50  
51  
52  
53  
54  
55  
56  
57  
58  
59  
60

652 reasons, these indications are not extended to other subgroups of patients (e.g., children,  
653 adolescents, frail, etc.) since insufficient literature is available.

For peer review only

Establishment of the Steering Committee and Panel of Experts

1  
2  
3  
4  
5  
6  
7  
8  
9  
10  
11  
12  
13  
14  
15  
16  
17  
18  
Generation of indications

- Comprehensive and evidence-based approach by a published scoping review of existing systematic reviews

Voting indications

- Online National Delphi Survey with all panel experts to identify any additional indications and to assess importance of candidate indications

Workshop meeting

- Finalization of the indications by online meeting with all panel experts

Dissemination

- Publication of good practice indications in national registries (e.g., SNLG, AGENAS)

For peer review only - <http://bmjopen.bmj.com/site/about/guidelines.xhtml>

1  
2  
3  
4  
5  
6  
7  
8  
9  
10  
11  
12  
13  
14  
15  
16  
17  
18  
19  
20  
21  
22  
23  
24  
25  
26  
27  
28  
29

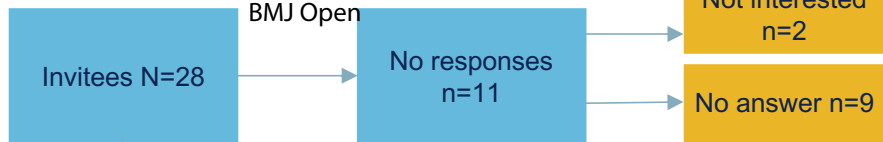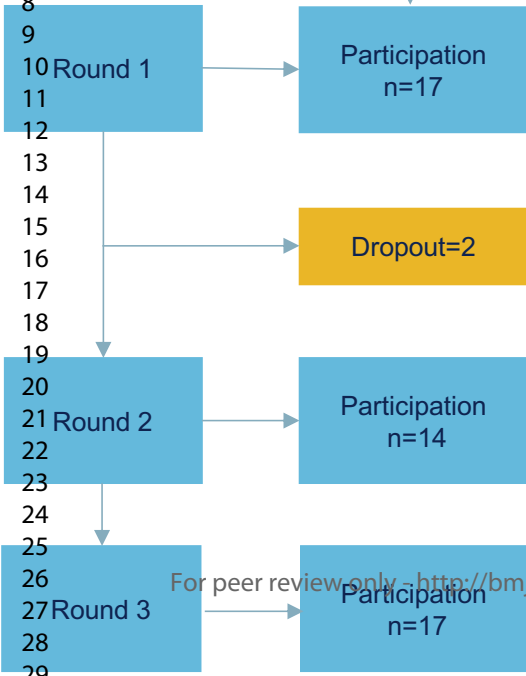

- Scientific and Technical Societies (STS)**
- Cittadinanzattiva APS
  - SIN (Società Italiana di Neurologia)
  - FMSI (Federazione Medico Sportiva Italiana)
  - SIUD (Società Italiana di Urodinamica)
  - SICuPP (Società Italiana Delle Cure Primarie Pediatriche)
  - SIMG (Società Italiana di Medicina Generale e delle cure primarie)
  - SIRN (Società Italiana di Riabilitazione Neurologica)
  - SIMLA (Società Italiana di Medicina Legale e delle Assicurazioni)
  - AOGOI (Associazione Ostetrici Ginecologi Ospedalieri Italiani)
  - SIR (Società italiana di Reumatologia)
  - FIASF (Federazione Italiana delle Associazioni Scientifiche di Fisioterapia)
  - SIFL (Società Italiana di Flebologia)
  - AIUG (Associazione Italiana di Urologia Ginecologia e del Pavimento Pelvico)
  - SIGO (Società Italiana Di Ginecologia E Ostetricia)
  - SISC (Società Italiana per lo Studio delle Cefalee)
  - OTODI (Ortopedi e Traumatologi Ospedalieri D'Italia)
  - Società Italiana di Pediatria (SIP)

1  
2  
3  
4  
5 **Supplementary Files**  
6

7 *Supplementary File 1. Ethical considerations* .....2

8  
9 *Supplementary File 2. Physical agent modalities description* .....2

10 **REFERENCES**.....6  
11  
12  
13  
14  
15  
16  
17  
18  
19  
20  
21  
22  
23  
24  
25  
26  
27  
28  
29  
30  
31  
32  
33  
34  
35  
36  
37  
38  
39  
40  
41  
42  
43  
44  
45  
46  
47  
48  
49  
50  
51  
52  
53  
54  
55  
56  
57  
58  
59  
60

For peer review only



## Supplementary File 1. Ethical considerations

Participation in the Delphi survey is voluntary and by invitation. The questionnaire includes a beginning section to acquire consent and privacy for data processing. Participants are informed that the responses will have 'remained total confidentiality according to the Regulation on the protection of personal data' 679/2016 of the European Union, and that the results will be used for research purposes and a document shared at the corporate level<sup>1</sup>. The interested party may be interested in the rights provided for by art. 15, 16, 17, 18, 20, 21 and 22 of the Regulation mentioned above.

Database randomization and differential privacy access were achieved. In addition, "anonymization" by generalizing was performed.<sup>2</sup> The study project and data collection were managed and anonymously entrusted by the Unit of Clinical Epidemiology of IRCCS Istituto Ortopedico Galeazzi based in Milano. The data subject cannot be re-identified and is therefore outside the scope of the data protection law<sup>3</sup>.

The row dataset was accessible to two researchers (SG, SB) excluded from participation in Delphi for the quantitative and qualitative analyses. This practice complies with the European standards for the use of aggregative data where the data subject cannot be re-identified, are not personal data and are therefore outside the scope of data protection law<sup>3</sup>. The final report only contains aggregate data. In the final document, we reported the names of the participants who have completed all rounds and gave their consent to disclose their names.

## Supplementary File 2. Physical agent modalities description

1) **Electrical stimulation:** electrotherapeutic currents and waveforms to facilitate neuromuscular or sensory activity to improve muscle strength and reeducate muscle function.<sup>4</sup>

- Neuromuscular electrical stimulation (NMES): use of pulsed currents to stimulate motor nerves, which in turn produce tetanic contractions of the neuromuscular spindles, with or without joint movement.<sup>5</sup>
- Functional Electrical Stimulation (FES) uses electrical pulses to stimulate motor neurons or denervated muscle fibers directly to elicit a contraction during a functional activity (e.g., gait). FES is used in the treatment of orthopedic and neurological conditions.<sup>6</sup>

2) **Neuromodulation, analgic and interferential electrical currents :** electrotherapeutic currents and waveforms to influence physiological effects on the patient's body structures and functions aiming to modulate pain.<sup>4</sup>

- Transcutaneous electrical nerve stimulation (TENS): delivers electrical stimulation via electrodes placed over the intact skin surface near the source of pain to produce analgesia or hypoalgesia. A wide variety of pulsed waveforms are used, with frequencies typically in the range of 1-100Hz. The intensities are set to produce sensory stimulations alone or in combination with motor stimulations to produce muscle twitches (acupuncture-like TENS).<sup>7</sup>
- Transcutaneous Tibialis Posterior Stimulation (TTNS): a form of neuromodulation involving the use of electrical impulses to address urinary symptoms (e.g. overactive bladder) with inhibitory action on neurons of the spinothalamic tract (S2–S3).<sup>8</sup>
- Interferential current (IC): involves crossing two medium frequency currents (most commonly 4000 Hz), which reportedly generates a low-frequency 'beating' (amplitude-modulated) effect at between 0 and 150 Hz in the deep tissues.<sup>9</sup> These beat frequencies are believed to decrease pain, increase circulation and block nerve conduction.

3) **Extracorporeal shock wave therapy:** a nonsurgical treatment that uses the phenomenon of mechanotransduction (i.e., adapting cells biochemical activity, influencing cells migration, proliferation, differentiation and apoptosis)<sup>10 11</sup> to treat various musculoskeletal conditions (e.g., plantar fasciitis; tennis elbow). Shock wave therapy can be either extracorporeal or radial.<sup>12</sup>

- Extracorporeal shock wave therapy (ESWT) involves passing sound waves (or shock waves) through the skin to the affected area. Shock waves are single pulsed acoustic or sonic waves, which dissipate mechanical energy at the interface of two substances with different acoustic impedance.<sup>13</sup> They are produced by generators of an electrical energy source and require an electroacoustic conversion mechanism and a focusing

1  
2  
3 device. Three types of systems can be distinguished based upon the sound source:  
4 electrohydraulic, electromagnetic and piezoelectric systems. Various doses appear to  
5 be used, with no apparent consensus on the minimum therapeutic dose. As defined  
6 defined by Cacchio 2006<sup>14</sup> as low-energy shock waves is less than 0.1 mJ/mm<sup>2</sup> and  
7 high-energy shock waves: is 0.2 mJ/mm<sup>2</sup> to 0.4 mJ/mm<sup>2</sup>).

- 8  
9 - Radial shock wave therapy (RSWT) is generated through the acceleration of a  
10 projectile inside the handpiece of the treatment device and then transmitted radially  
11 from the tip of the applicator to the target zone. Radial shock waves show a lower  
12 peak pressure and a considerably longer rise time than extracorporeal shock waves.  
13 In RSWT, the focal point is not centred on a target zone, as occurs in focal ESWT,  
14 but on the tip of the applicator.<sup>14</sup>

15  
16  
17 **4) Laser therapy:** light source treatment, non-invasive, widely used to treat various  
18 musculoskeletal conditions.

- 19  
20  
21 - Low-level laser therapy (LLLT) generates a beam of light with a particular  
22 wavelength that can deliver light energy to tissue depths below the dermis<sup>15</sup>.  
23 Studies suggest that LLLT contributes to pain relief by reducing pro-inflammatory  
24 cytokines<sup>16</sup>. The effects of LLLT are considered to be dependent on dosage,  
25 wavelength, site and duration of treatment.<sup>15 16</sup>
- 26  
27  
28 - high level laser therapy (HLLT): laser with an output power greater than 500 mW  
29 or 0.5 Watts. HLLT creates heat on the surface of the skin due to their higher power  
30 density (irradiance).<sup>17</sup>

31  
32  
33  
34 **5) Electromagnetic therapy:** based on Faraday's law of electromagnetic induction, to promote  
35 bone healing, treat osteoarthritis and inflammatory diseases of the musculoskeletal system,  
36 alleviate pain, enhance healing of ulcers and reduce spasticity<sup>18</sup>.

37  
38 - Pulsed Electromagnetic Field therapy (PEMF), which involves the delivery of pulsing (that  
39 is 'on-off') low-frequency magnetic fields through the body, which is believed to provide  
40 temporary pain relief by influencing tissue generation and cell proliferation.<sup>19</sup>

41  
42 - Repetitive magnetic stimulation (rMS), which allows the transcutaneous induction of nerve  
43 stimulating electric currents. This technique requires extremely strong and sharp magnetic  
44 impulses (for example 15,000 amperes peak current; 2.5 T field strength; < 1 msec) applied  
45 by specially designed coils (< 10 cm) over the target area. Modern devices allow the repetition  
46 of up to 60 impulses per second. Mainly developed to study and influence brain functions,  
47 rMS also stimulates spinal chord fibres and peripheral nerves. Initial studies used peripheral  
48 rMS for therapeutic reasons, such as in myofascial pain syndrome<sup>20</sup>. Since the resulting small  
49 electric impulses are the nerve stimulating factor, rMS effects may be similar to TENS.  
50  
51  
52  
53

54  
55 **6) Shortwave and microwave Diathermy**

- 56 - Tecartherapy or radiofrequency diathermy (RFD) is a non-invasive therapy and  
57 consists in the emission of high-frequency electromagnetic waves which increase  
58 tissue metabolism. This process promotes tissue repair and affects pain  
59 sensitivity.<sup>21 22 23</sup>  
60

- 1  
2  
3  
4  
5  
6  
7  
8  
9  
10  
11  
12  
13  
14  
15  
16  
17  
18  
19  
20  
21  
22  
23  
24  
25  
26  
27  
28  
29  
30  
31  
32  
33  
34  
35  
36  
37  
38  
39  
40  
41  
42  
43  
44  
45  
46  
47  
48  
49  
50  
51  
52  
53  
54  
55  
56  
57  
58  
59  
60
- Microwave diathermy: a deep heating modality that converts electromagnetic energy to thermal energy. Frequencies approved for therapeutic microwave are 915 MHz (wavelength 33 cm) and 2,456 MHz (wavelength 12 cm). The lower frequency has the advantage of increased depth of penetration but also the disadvantages of greater beam dispersion and the requirement of larger applicators. If muscle heating is primary objective, 915-MHz applicators are preferable to 2,456-MHz applicators. Average temperatures of approximately 41°C at a depth of 1–3 cm have been demonstrated<sup>24</sup>

- 7) **Hot thermal agents:** heat transferred from an object with direct contact to the body. Heat therapy include hot packs, heatwraps, hot/warm water immersion, sauna. Heat treatment increases metabolism in tissues, promotes blood circulation and reduces pain. The temperature of the heat therapy is generally 35–40°C.<sup>25 26</sup>
- 8) **Cryotherapy:** cold is transferred from an object with direct contact to the body. Examples include cold packs, cold-water immersion ( $\leq 15^{\circ}\text{C}$ ), ice massage, the novel modality of cryotherapy. Cryotherapy is a treatment involving very short exposures to extremely cold dry air to the whole patient or a treatment area (mean temperature of the cryotherapy chamber is at  $-30^{\circ}\text{C}$ ,  $-80$  to  $-110^{\circ}\text{C}$ , or  $< -110^{\circ}\text{C}$ ). Cold treatment is thought to reduce swelling and cell metabolism, minimizing oedema, pain and injury.<sup>25 27</sup>
- 9) **Therapeutic Ultrasound:** delivers energy to deep tissue sites through ultrasonic waves (often at frequencies of 1 or 3 MHz and intensities between 0.1 watts/cm<sup>2</sup> and 3 watts/cm<sup>2</sup>) using a crystal sound head. Treatment can be delivered in two forms, continuous (non- stop ultrasonic waves) and pulsed (intermittent ultrasonic waves<sup>22 28</sup>). The treatment aim to increase tissue temperature and induce non-thermal physiological changes (such as cell permeability and cell growth), which are believed to promote soft tissue healing and muscle relaxation.<sup>29</sup>

## REFERENCES

1. Regolamento generale sulla protezione dei dati. Regolamento (UE) 2016/679 del Parlamento europeo e del Consiglio del 27 aprile 2016. Available at <https://www.garanteprivacy.it/documents/10160/0/Regolamento+UE+2016+679.+Arricchito+con+riferimenti+ai+Considerando+Aggiornato+alle+rettifiche+pubblicate+sulla+Gazzetta+Ufficiale++dell%27Unione+europea+127+del+23+maggio+2018>.
2. [https://ec.europa.eu/justice/article-29/documentation/opinion-recommendation/files/2014/wp216\\_en.pdf](https://ec.europa.eu/justice/article-29/documentation/opinion-recommendation/files/2014/wp216_en.pdf).
3. [https://commission.europa.eu/sites/default/files/5\\_h2020\\_ethics\\_and\\_data\\_protection\\_0.pdf](https://commission.europa.eu/sites/default/files/5_h2020_ethics_and_data_protection_0.pdf).
4. Bellew JW. Foundations of Clinical Electrotherapy. In: Bellew JW, Michlovitz SL, Nolan Jr TP, eds. Modalities for Therapeutic Intervention, 6e. New York, NY: McGraw-Hill Education 2016.
5. Lake DA. Neuromuscular electrical stimulation. An overview and its application in the treatment of sports injuries. *Sports Med* 1992;13(5):320-36. doi: 10.2165/00007256-199213050-00003 [published Online First: 1992/05/01]
6. Martin R, Sadowsky C, Obst K, et al. Functional electrical stimulation in spinal cord injury:: from theory to practice. *Top Spinal Cord Inj Rehabil* 2012;18(1):28-33. doi: 10.1310/sci1801-28 [published Online First: 2012/01/01]
7. Jones I, Johnson MI. Transcutaneous electrical nerve stimulation. *Continuing Education in Anaesthesia Critical Care & Pain* 2009;9(4):130-35. doi: 10.1093/bjaceaccp/mkp021
8. Mallmann S, Ferla L, Rodrigues MP, et al. Comparison of parasacral transcutaneous electrical stimulation and transcutaneous posterior tibial nerve stimulation in women with overactive bladder syndrome: A randomized clinical trial. *Eur J Obstet Gynecol Reprod Biol* 2020;250:203-08. doi: 10.1016/j.ejogrb.2020.05.005 [published Online First: 2020/05/29]
9. Beatti A, Rayner A, Souvlis T, et al. The analgesic effect of interferential therapy on clinical and experimentally induced pain. *Physical Therapy Reviews* 2010;15(4):243-52. doi: 10.1179/174328810X12647087218992
10. Ingber DE. Mechanobiology and diseases of mechanotransduction. *Ann Med* 2003;35(8):564-77. doi: 10.1080/07853890310016333 [published Online First: 2004/01/08]
11. T. Watson e E. L. Nussbaum, Electrophysical Agents. Evidence-based Practice. 13th Edition, Amsterdam, The Netherlands: Elsevier Health Sciences, 2021.
12. Surace SJ, Deitch J, Johnston RV, et al. Shock wave therapy for rotator cuff disease with or without calcification. *Cochrane Database of Systematic Reviews* 2020(3) doi: 10.1002/14651858.CD008962.pub2
13. Kim EK, Kwak KI. Effect of extracorporeal shock wave therapy on the shoulder joint functional status of patients with calcific tendinitis. *J Phys Ther Sci* 2016;28(9):2522-24. doi: 10.1589/jpts.28.2522 [published Online First: 2016/11/02]
14. Cacchio A, Paoloni M, Barile A, et al. Effectiveness of radial shock-wave therapy for calcific tendinitis of the shoulder: single-blind, randomized clinical study. *Phys Ther* 2006;86(5):672-82. [published Online First: 2006/05/03]
15. Bjordal JM, Lopes-Martins RAB, Joensen J, et al. The anti-inflammatory mechanism of low level laser therapy and its relevance for clinical use in physiotherapy. *Physical Therapy Reviews* 2010;15(4):286-93. doi: 10.1179/1743288X10Y.0000000001
16. Bjordal JM, Johnson MI, Iversen V, et al. Low-level laser therapy in acute pain: a systematic review of possible mechanisms of action and clinical effects in randomized placebo-controlled trials. *Photomed Laser Surg* 2006;24(2):158-68. doi: 10.1089/pho.2006.24.158 [published Online First: 2006/05/19]
17. Song HJ, Seo HJ, Lee Y, et al. Effectiveness of high-intensity laser therapy in the treatment of musculoskeletal disorders: A systematic review and meta-analysis of randomized controlled

- 1  
2  
3 trials. *Medicine (Baltimore)* 2018;97(51):e13126. doi: 10.1097/md.00000000000013126  
4 [published Online First: 2018/12/24]
- 5 18. Paolucci T, Pezzi L, Centra AM, et al. Electromagnetic Field Therapy: A Rehabilitative  
6 Perspective in the Management of Musculoskeletal Pain - A Systematic Review. *J Pain Res*  
7 2020;13:1385-400. doi: 10.2147/jpr.S231778 [published Online First: 2020/07/02]
- 8 19. Gordon GA. Designed electromagnetic pulsed therapy: clinical applications. *J Cell Physiol*  
9 2007;212(3):579-82. doi: 10.1002/jcp.21025 [published Online First: 2007/06/20]
- 10 20. Smania N, Corato E, Fiaschi A, et al. Repetitive magnetic stimulation: a novel therapeutic  
11 approach for myofascial pain syndrome. *J Neurol* 2005;252(3):307-14. doi:  
12 10.1007/s00415-005-0642-1 [published Online First: 2005/02/24]
- 13 21. Laufer Y, Dar G. Effectiveness of thermal and athermal short-wave diathermy for the  
14 management of knee osteoarthritis: a systematic review and meta-analysis. *Osteoarthritis*  
15 *Cartilage* 2012;20(9):957-66. doi: 10.1016/j.joca.2012.05.005 [published Online First:  
16 2012/06/05]
- 17 22. Allen RJ. Physical agents used in the management of chronic pain by physical therapists. *Phys*  
18 *Med Rehabil Clin N Am* 2006;17(2):315-45. doi: 10.1016/j.pmr.2005.12.007 [published  
19 Online First: 2006/04/18]
- 20 23. Shields N, Gormley J, O'Hare N. Short-Wave Diathermy: A Review of Existing Clinical Trials.  
21 *Physical Therapy Reviews* 2001;6(2):101-18. doi: 10.1179/ptr.2001.6.2.101
- 22 24. Goats GC, Physiotherapy Treatment Modalities -Microwave diathermy. *Br. J. Sp. Med.* 2012;  
23 24: 212–218.
- 24 25. Wang Y, Lu H, Li S, et al. Effect of cold and heat therapies on pain relief in patients with  
25 delayed onset muscle soreness: A network meta-analysis. *J Rehabil Med* 2022;54:jrm00258.  
26 doi: 10.2340/jrm.v53.331 [published Online First: 2021/10/13]
- 27 26. Petrofsky JS, Khowailed IA, Lee H, et al. Cold Vs. Heat After Exercise-Is There a Clear Winner  
28 for Muscle Soreness. *J Strength Cond Res* 2015;29(11):3245-52. doi:  
29 10.1519/jsc.0000000000001127 [published Online First: 2015/10/27]
- 30 27. Guilhem G, Hug F, Couturier A, et al. Effects of air-pulsed cryotherapy on neuromuscular  
31 recovery subsequent to exercise-induced muscle damage. *Am J Sports Med*  
32 2013;41(8):1942-51. doi: 10.1177/0363546513490648 [published Online First: 2013/06/07]
- 33 28. Watson T. Ultrasound in contemporary physiotherapy practice. *Ultrasonics* 2008;48(4):321-9.  
34 doi: 10.1016/j.ultras.2008.02.004 [published Online First: 2008/05/10]
- 35 29. O'Brien WD, Jr. Ultrasound-biophysics mechanisms. *Prog Biophys Mol Biol* 2007;93(1-3):212-  
36 55. doi: 10.1016/j.pbiomolbio.2006.07.010 [published Online First: 2006/08/29]
- 37  
38  
39  
40  
41  
42  
43  
44  
45  
46  
47  
48  
49  
50  
51  
52  
53  
54  
55  
56  
57  
58  
59  
60



**CREDES Checklist:****Recommendations for the Conducting and REporting of DElphi Studies (CREDES)[1]****Technology in Palliative Care (TIP): the identification of digital priorities for palliative care research using a modified Delphi method**

| Items of reporting                                                                                                                                                                                                                                                                                                                                                                                                                                                                                                                                                                                                                                                                                                                                                                                                                                                                       | Reported on page           |
|------------------------------------------------------------------------------------------------------------------------------------------------------------------------------------------------------------------------------------------------------------------------------------------------------------------------------------------------------------------------------------------------------------------------------------------------------------------------------------------------------------------------------------------------------------------------------------------------------------------------------------------------------------------------------------------------------------------------------------------------------------------------------------------------------------------------------------------------------------------------------------------|----------------------------|
| <i>Purpose and rationale.</i> The purpose of the study should be clearly defined and demonstrate the appropriateness of the use of the Delphi technique as a method to achieve the research aim. A rationale for the choice of the Delphi technique as the most suitable method needs to be provided.                                                                                                                                                                                                                                                                                                                                                                                                                                                                                                                                                                                    | 5 - 6                      |
| <i>Expert panel.</i> Criteria for the selection of experts and transparent information on recruitment of the expert panel, sociodemographic details including information on expertise regarding the topic in question, (non)response and response rates over the ongoing iterations should be reported.                                                                                                                                                                                                                                                                                                                                                                                                                                                                                                                                                                                 | 7                          |
| <i>Description of the methods.</i> The methods employed need to be comprehensible; this includes information on preparatory steps (How was available evidence on the topic in question synthesised?), piloting of material and survey instruments, design of the survey instrument(s), the number and design of survey rounds, methods of data analysis, processing and synthesis of experts' responses to inform the subsequent survey round and methodological decisions taken by the research team throughout the process.                                                                                                                                                                                                                                                                                                                                                            | 7-10                       |
| <i>Procedure.</i> Flow chart to illustrate the stages of the Delphi process, including a preparatory phase, the actual 'Delphi rounds', interim steps of data processing and analysis, and concluding steps.                                                                                                                                                                                                                                                                                                                                                                                                                                                                                                                                                                                                                                                                             | 6-9; Figure 1-2            |
| <i>Definition and attainment of consensus.</i> It needs to be comprehensible to the reader how consensus was achieved throughout the process, including strategies to deal with non-consensus.                                                                                                                                                                                                                                                                                                                                                                                                                                                                                                                                                                                                                                                                                           | 9-10                       |
| <i>Results.</i> Reporting of results for each round separately is highly advisable in order to make the evolving of consensus over the rounds transparent. This includes figures showing the average group response, changes between rounds, as well as any modifications of the survey instrument such as deletion, addition or modification of survey items based on previous rounds.                                                                                                                                                                                                                                                                                                                                                                                                                                                                                                  | 10-12; Table 2; Appendix 2 |
| <i>Discussion of limitations.</i> Reporting should include a critical reflection of potential limitations and their impact of the resulting guidance.                                                                                                                                                                                                                                                                                                                                                                                                                                                                                                                                                                                                                                                                                                                                    | 15-16                      |
| <i>Adequacy of conclusions.</i> The conclusions should adequately reflect the outcomes of the Delphi study with a view to the scope and applicability of the resulting practice guidance.                                                                                                                                                                                                                                                                                                                                                                                                                                                                                                                                                                                                                                                                                                | 16                         |
| <i>Publication and dissemination.</i> The resulting guidance on good practice in palliative care should be clearly identifiable from the publication, including recommendations for transfer into practice and implementation. If the publication does not allow for a detailed presentation of either the resulting practice guidance or the methodological features of the applied Delphi technique, or both, reference to a more detailed presentation elsewhere should be made (e.g. availability of the full guideline from the authors or online; publication of a separate paper reporting on methodological details and particularities of the process (e.g. persistent disagreement and controversy on certain issues)). A dissemination plan should include endorsement of the guidance by professional associations and health care authorities to facilitate implementation. | 13-14                      |

- Jünger S, Payne SA, Brine J, Radbruch L, Brearley SG. Guidance on Conducting and REporting DElphi Studies (CREDES) in palliative care: Recommendations based on a methodological systematic review. *Palliat Med.* 2017;31: 684–706. doi:10.1177/0269216317690685

# BMJ Open

## Evidence-informed and consensus-based indications about SAFETY of Physical Agent Modalities Practice in physiotherapy and rehabilitation medicine (SAFE PAMP): a national Delphi of healthcare scientific societies

|                                 |                                                                                                                                                                                                                                                                                                                                                                                                                                                                                                                                                                                                                                                                                                                                                                                                                                                                                                                                                                                                                                                                                         |
|---------------------------------|-----------------------------------------------------------------------------------------------------------------------------------------------------------------------------------------------------------------------------------------------------------------------------------------------------------------------------------------------------------------------------------------------------------------------------------------------------------------------------------------------------------------------------------------------------------------------------------------------------------------------------------------------------------------------------------------------------------------------------------------------------------------------------------------------------------------------------------------------------------------------------------------------------------------------------------------------------------------------------------------------------------------------------------------------------------------------------------------|
| Journal:                        | <i>BMJ Open</i>                                                                                                                                                                                                                                                                                                                                                                                                                                                                                                                                                                                                                                                                                                                                                                                                                                                                                                                                                                                                                                                                         |
| Manuscript ID                   | bmjopen-2023-075348.R1                                                                                                                                                                                                                                                                                                                                                                                                                                                                                                                                                                                                                                                                                                                                                                                                                                                                                                                                                                                                                                                                  |
| Article Type:                   | Original research                                                                                                                                                                                                                                                                                                                                                                                                                                                                                                                                                                                                                                                                                                                                                                                                                                                                                                                                                                                                                                                                       |
| Date Submitted by the Author:   | 30-Oct-2023                                                                                                                                                                                                                                                                                                                                                                                                                                                                                                                                                                                                                                                                                                                                                                                                                                                                                                                                                                                                                                                                             |
| Complete List of Authors:       | Gianola, Silvia; IRCCS Galeazzi Orthopaedic Institute, Unit of Clinical Epidemiology<br>Bargeri, Silvia; IRCCS Galeazzi Orthopaedic Institute, Unit of Clinical Epidemiology<br>Pellicciari, Leonardo; IRCCS Istituto Delle Scienze Neurologiche di Bologna<br>Gambazza, Simone; Fondazione IRCCS Ca' Granda Ospedale Maggiore Policlinico<br>Rossettini, Giacomo; Università degli Studi di Verona, School of Physiotherapy<br>Fulvio, Anna; Associazione Italiana di Fisioterapia<br>Genovese, Vincenzo; Associazione Italiana di Fisioterapia<br>Benedini, Matteo; Associazione Italiana di Fisioterapia<br>Proverbio, Emanuele; Associazione Italiana di Fisioterapia<br>Cecchetto, Simone; Associazione Italiana di Fisioterapia; Provincia autonoma di Trento Azienda Provinciale per i Servizi Sanitari<br>Castellini, Greta; IRCCS Istituto Ortopedico Galeazzi, Clinical Epidemiology Unit<br>Turolla, Andrea; Alma Mater Studiorum University of Bologna; IRCCS Policlinico Sant'Orsola-Malpighi<br>SAFE PAMP Collaborators, SAFE PAMP Collaborators; SAFE PAMP Collaborators |
| <b>Primary Subject Heading</b>: | Rehabilitation medicine                                                                                                                                                                                                                                                                                                                                                                                                                                                                                                                                                                                                                                                                                                                                                                                                                                                                                                                                                                                                                                                                 |
| Secondary Subject Heading:      | Rehabilitation medicine, Rheumatology, Sports and exercise medicine, Neurology, Urology                                                                                                                                                                                                                                                                                                                                                                                                                                                                                                                                                                                                                                                                                                                                                                                                                                                                                                                                                                                                 |
| Keywords:                       | Physical Therapy Modalities, REHABILITATION MEDICINE, Health & safety < HEALTH SERVICES ADMINISTRATION & MANAGEMENT, Musculoskeletal disorders < ORTHOPAEDIC & TRAUMA SURGERY, ORTHOPAEDIC & TRAUMA SURGERY, NEUROLOGY                                                                                                                                                                                                                                                                                                                                                                                                                                                                                                                                                                                                                                                                                                                                                                                                                                                                  |
|                                 |                                                                                                                                                                                                                                                                                                                                                                                                                                                                                                                                                                                                                                                                                                                                                                                                                                                                                                                                                                                                                                                                                         |



1  
2  
3  
4  
5  
6  
7  
8  
9  
10  
11  
12  
13  
14  
15  
16  
17  
18  
19  
20  
21  
22  
23  
24  
25  
26  
27  
28  
29  
30  
31  
32  
33  
34  
35  
36  
37  
38  
39  
40  
41  
42  
43  
44  
45  
46  
47  
48  
49  
50  
51  
52  
53  
54  
55  
56  
57  
58  
59  
60

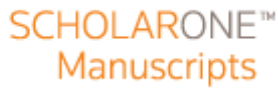



I, the Submitting Author has the right to grant and does grant on behalf of all authors of the Work (as defined in the below author licence), an exclusive licence and/or a non-exclusive licence for contributions from authors who are: i) UK Crown employees; ii) where BMJ has agreed a CC-BY licence shall apply, and/or iii) in accordance with the terms applicable for US Federal Government officers or employees acting as part of their official duties; on a worldwide, perpetual, irrevocable, royalty-free basis to BMJ Publishing Group Ltd ("BMJ") its licensees and where the relevant Journal is co-owned by BMJ to the co-owners of the Journal, to publish the Work in this journal and any other BMJ products and to exploit all rights, as set out in our [licence](#).

The Submitting Author accepts and understands that any supply made under these terms is made by BMJ to the Submitting Author unless you are acting as an employee on behalf of your employer or a postgraduate student of an affiliated institution which is paying any applicable article publishing charge ("APC") for Open Access articles. Where the Submitting Author wishes to make the Work available on an Open Access basis (and intends to pay the relevant APC), the terms of reuse of such Open Access shall be governed by a Creative Commons licence – details of these licences and which [Creative Commons](#) licence will apply to this Work are set out in our licence referred to above.

Other than as permitted in any relevant BMJ Author's Self Archiving Policies, I confirm this Work has not been accepted for publication elsewhere, is not being considered for publication elsewhere and does not duplicate material already published. I confirm all authors consent to publication of this Work and authorise the granting of this licence.

1  
2  
3 1 **Evidence-informed and consensus-based indications about SAFETY of Physical**  
4  
5  
6 2 **Agent Modalities Practice in physiotherapy and rehabilitation medicine (SAFE**  
7  
8 3 **PAMP): a national Delphi of healthcare scientific societies**  
9  
10  
11 4

12  
13 5 ***Authors List***  
14

15 6 *Silvia Gianola<sup>1</sup>, Silvia Bargerì<sup>1</sup>, Leonardo Pellicciari<sup>2</sup>, Simone Gambazza<sup>3</sup>, Giacomo Rossettini<sup>4</sup>, Anna*  
16  
17 7 *Fulvio<sup>5</sup>, Vincenzo Genovese<sup>5</sup>, Matteo Benedini<sup>5</sup>, Emanuele Proverbio<sup>5</sup>, Simone Cecchetto<sup>5,6</sup>, Greta*  
18  
19 8 *Castellini<sup>1\*</sup>, Andrea Turolla<sup>7,8\*</sup> and SAFE PAMP Collaborators*  
20  
21  
22 9

- 23  
24  
25 10 1. IRCCS Istituto Ortopedico Galeazzi, Unit of Clinical Epidemiology, Milan, Italy  
26  
27 11 2. IRCCS Istituto delle Scienze Neurologiche di Bologna, Bologna, Italy  
28  
29 12 3. Healthcare Professions Department, Fondazione IRCCS Ca' Granda Ospedale Maggiore Policlinico,  
30  
31 13 Milan, Italy  
32  
33 14 4. School of Physiotherapy, University of Verona, Verona, Italy  
34  
35 15 5. Associazione Italiana di Fisioterapia (AIFI), Rome, Italy  
36  
37 16 6. Direction of Health Professions, APSS, 38014 Trento, Italy.  
38  
39 17 7. Department of Biomedical and Neuromotor Sciences-DIBINEM, Alma Mater Studiorum Università  
40  
41 18 di Bologna, 40138 Bologna, Italy.  
42  
43 19 8. Unit of Occupational Medicine, IRCCS Azienda Ospedaliero-Universitaria di Bologna, Bologna, Italy  
44  
45  
46

47 20 Corresponding author:

48  
49 21 Silvia Bargerì

50  
51 22 IRCCS Istituto Ortopedico Galeazzi, Unit of Clinical Epidemiology, Milan, Italy

52  
53 23 [silvia.bargerì@grupposandonato.it](mailto:silvia.bargerì@grupposandonato.it)

54  
55 24 \*co-last  
56  
57  
58

59 25 ***SAFE PAMP Collaborators***  
60

26 *Chiara Torresetti, on behalf of AIUG (Associazione Italiana di Urologia Ginecologia e del Pavimento Pelvico)*

- 1  
2  
3 27 *Bianca Masturzo, on behalf of AOGOI (Associazione Ostetrici Ginecologi Ospedalieri Italiani)*  
4  
5 28 *Carla Berliri, on behalf of Cittadinanzattiva Associazione di Promozione Sociale*  
6  
7 29 *Mauro Roselli, on behalf of OTODI (Ortopedici e Traumatologi Ospedalieri D'Italia)*  
8  
9 30 *Stefano Vercelli, on behalf of FIASF (Federazione Italiana delle Associazioni Scientifiche di Fisioterapia)*  
10  
11 31 *Marco Scorcu, on behalf of FMSI (Federazione Medico Sportiva Italiana)*  
12  
13 32 *Giuseppe Botta, on behalf of SIFL (Società Italiana di Flebologia)*  
14  
15 33 *Luigi Nappi, on behalf of SIGO (Società Italiana Di Ginecologia E Ostetricia)*  
16  
17 34 *Gianmarco Rea, on behalf of SIMG (Società Italiana di Medicina Generale e delle cure primarie)*  
18  
19 35 *Enrico Marinelli, on behalf of SIMLA (Società Italiana di Medicina Legale e delle Assicurazioni)*  
20  
21 36 *Fabio Bandini, on behalf of SIN (Società Italiana di Neurologia)*  
22  
23 37 *Roberto Bortolotti, on behalf of SIR (Società Italiana di Reumatologia)*  
24  
25 38 *Viviana Rosati, on behalf of SIRN (Società Italiana di Riabilitazione Neurologica)*  
26  
27 39 *Armando Perrotta, on behalf of SISC (Società Italiana per lo Studio delle Cefalee)*  
28  
29 40 *Gianfranco Lamberti, on behalf of SIUD (Società Italiana di Urologia)*  
30  
31 41 *Monica Pierattelli, on behalf of SICuPP (Società Italiana Delle Cure Primarie Pediatriche)*  
32  
33 42 *Giancarlo Tancredi, on behalf of SIP (Società Italiana di Pediatria).*  
34  
35  
36  
37  
38  
39  
40  
41  
42  
43  
44  
45  
46  
47  
48  
49  
50  
51  
52  
53  
54  
55  
56  
57  
58  
59  
60

1  
2  
3 **43 ABSTRACT: 272 words**  
4

5 **44 Objective:** A shared consensus on safety about Physical Agent Modalities (PAMs) in physiotherapy  
6  
7 and rehabilitation is lacking. We aimed to develop evidence-informed and consensus-based  
8  
9 indications about the safety of PAMs.  
10

11  
12 **47 Study design and setting:** A RAND-modified Delphi rounds' survey was used to reach a consensus.  
13  
14 We established a steering committee of the Italian Association of Physiotherapy (Associazione  
15  
16 Italiana di Fisioterapia - AIFI) to identify areas and questions for developing indications about the  
17  
18 safety of the most commonly used PAMs in physiotherapy and rehabilitation. We invited 28 National  
19  
20 Scientific and Technical Societies (STS), including forensics and lay members, as a multidisciplinary  
21  
22 and multi-professional panel of experts to evaluate the proposed indications and formulate additional  
23  
24 inputs. The level of agreement was measured with a 9-point Likert scale. Consensus in the Delphi  
25  
26 rounds was assessed using the rating proportion with a threshold of 75%.  
27  
28  
29

30 **55 Results:** Seventeen (61%) out of 28 STS participated, involving their most representative members.  
31  
32 Experts composing the panel were mainly clinicians (88%) reporting multiple expertise in  
33  
34 musculoskeletal (47%), pelvic floor (24%), neurological (18%) and lymphatic (6%) disorders with a  
35  
36 median experience of 30 years (IQR=17-36). Two Delphi rounds were necessary to reach a  
37  
38 consensus. The final approved criteria list comprised nine indications about the safety in adult patients  
39  
40 on nine PAMs (i.e., electrical stimulation neuromodulation, extracorporeal shock wave therapy, laser  
41  
42 therapy, electromagnetic therapy, diathermy, hot thermal agents, cryotherapy and therapeutic  
43  
44 ultrasound) with a general note about populations subgroups.  
45  
46  
47

48  
49 **63 Conclusions:** The resulting consensus-based indications inform patients, healthcare professionals and  
50  
51 policy-makers regarding the safe application of PAMs in physiotherapy and rehabilitation. Future  
52  
53 research is needed to extend this consensus on pediatric and frail patients.  
54  
55

56  
57 **66 Key Words:** Physical Therapy Modalities, Safety, Rehabilitation, Physical and Rehabilitation  
58  
59 Medicine, Delphi Technique, Orthopedics, Neurology, Pelvic Floor, Musculoskeletal System  
60  
67

1  
2  
3 68 **STRENGTH AND LIMITATIONS**  
4  
5

- 6  
7 69           • We developed a national electronic survey based on a Rand Delphi technique aiming  
8  
9 70           to identify, assess and modify indications for safe Physical Agent Modalities (PAMs)  
10  
11 71           in rehabilitation.  
12  
13 72           • Starting from a recent scoping review of the literature we refined evidence-informed  
14  
15 73           indications of rehabilitation for safe PAMs;  
16  
17 74           • The multi-professional and multidisciplinary panel of experts rated and revised the  
18  
19 75           agreement of indications for safe PAMs rehabilitation in multiple rounds until  
20  
21 76           reaching consensus.  
22  
23 77           • Indications were restricted to PAMs safety, not addressing their clinical effectiveness.  
24  
25  
26  
27  
28  
29  
30  
31  
32  
33  
34  
35 81

## 82 INTRODUCTION

83 Physical agent modalities (PAMs) are extensively applied in physiotherapy and rehabilitation to elicit  
84 therapeutic effects on tissues, including reducing swelling, alleviating pain, expediting the healing  
85 process, and improving muscle tone.(1-4) Healthcare professionals from diverse medical specialties  
86 can recommend and administer these treatments alongside other physiotherapy and rehabilitation  
87 interventions. However, clinicians and patients must be informed about the safety of the proposed  
88 treatments. Previous consensus regarding contraindications and precautions associated with using  
89 PAMs from various organizations were released in the early 2000s.(5-7) Still, they have become  
90 outdated in light of technological advancements of the last years.(8, 9) A recent scoping review of  
91 the literature(10) examined several systematic reviews on the safety of commonly used PAMs (i.e.,  
92 cryotherapy, electrical stimulation, transcutaneous electrical nerve stimulation, functional electrical  
93 stimulation, extracorporeal shockwave therapy, laser therapy, magnetotherapy, pulsed  
94 electromagnetic field and diathermy), revealing no important harm associated with their use.  
95 Nevertheless, it is worth noting that adverse events may be underreported in primary studies(11, 12)  
96 highlighting the need to integrate expert experience to bridge the current gaps between existing  
97 literature and clinical practice. Therefore, the purpose of the SAFETY of Physical Agent Modalities  
98 Practice (SAFE PAMP) consensus in physiotherapy and rehabilitation is to develop evidence-  
99 informed and expert consensus-based indications about the safety of PAMs through a RAND Delphi  
100 procedure. Our goal is to make patients, healthcare professionals and policy-makers aware about the  
101 safe application of PAMs in physiotherapy and rehabilitation.

## 102 METHODS

### 103 Design

104 A RAND-modified Delphi rounds survey process was employed as the facilitation technique for  
105 reaching expert consensus.(13, 14) Delphi technique is primarily used when the available knowledge  
106 is incomplete or subject to uncertainty.(15) We followed the guidance on "Conducting and REporting  
107 of DELphi Studies" (CREDES).(16, 17) This project is exempted from ethical approval according to  
108 the "ethics and data protection" regulations of the European Commission.(18) More details are  
109 reported in **Supplementary File 1**. The protocol was *a-priori* registered on the Open Science  
110 Framework (OSF) online repository.(19)

111 The process consisted of four phases: (i) establishment of the steering committee and invitation of  
112 national scientific and technical societies (STS) to constitute the panel of experts; (ii) generation of  
113 indications using a comprehensive approach based on a published scoping review of existing  
114 systematic reviews on PAMs safety in physiotherapy and rehabilitation medicine(10) as well as on  
115 expertise from content experts of the steering committee; (iii) voting of indications from the panel of  
116 experts through a national Delphi survey aiming to identify, assess and modify indications importance  
117 for each field (e.g., musculoskeletal); (iv) an online workshop meeting to finalize the list of  
118 indications reaching the final consensus. Finally, we planned to disseminate the final indications list  
119 as good clinical practice (**Figure 1**).

[Figure 1]

### 123 **Phase I. Establishment of the steering committee and panel of experts**

#### 124 *Steering committee*

125 In June 2022, the project team nominated a steering committee responsible for defining the list of  
126 indications of safe PAMs, selecting national STS for expert participants, developing the Delphi  
127 questionnaires, and analyzing responses from participants after each round.



1  
2  
3 128 The steering committee involved 11 content experts from the Italian Association of Physiotherapy  
4  
5 129 (Associazione Italiana di Fisioterapia – AIFI), a member of the World Physiotherapy (20). AIFI is  
6  
7  
8 130 the STS in Italy for the physiotherapy profession recognized by the Italian Minister of Health to  
9  
10 131 produce clinical practice guidelines in the field.(21, 22)

11  
12 132 To assure the external validity of the consensus process, the steering committee included two content  
13  
14 133 experts on PAMs (MB, EP), three on rehabilitation of musculoskeletal disorders (GR, VG, SB), one  
15  
16  
17 134 on neurological physiotherapy and neuroscience (AT), one on pelvic floor rehabilitation (AF), and  
18  
19 135 four methodologists (SGa, SGi, GC, LP).

20  
21  
22 136

### 23 24 137 *Panel of experts*

25  
26 138 It is known that the diversity of a Delphi panel has an impact on the quality of the final  
27  
28 139 recommendations. In contrast, no agreement on the panel size for Delphi studies exists. Panels of 20–  
29  
30  
31 140 30 participants are common.(23, 24) Thus, the steering committee invited all the national  
32  
33 141 multidisciplinary and multi-professional STS involved in physiotherapy and rehabilitation care  
34  
35 142 (n=26) and the STS dealing with forensics (n=1). These STS were identified from the published  
36  
37  
38 143 endorsed by the Italian Ministry of Health and are recognized as the ones entitled to generate national  
39  
40 144 clinical practice guidelines.(21, 22) Each STS delegated their most representative member involved  
41  
42 145 in physiotherapy and rehabilitation care to join the panel of experts. The panel of expert members  
43  
44  
45 146 was multidisciplinary and multi-professional, including clinicians, researchers, and healthcare  
46  
47 147 managers from different fields(24) (e.g., orthopedics, neurology). To represent patients' perspectives,  
48  
49 148 the panel also included a lay member from Cittadinazattiva,(25) the largest Italian patient advocate  
50  
51  
52 149 organization that promotes citizen activism for the protection of rights, the care of common goods,  
53  
54 150 and support for people in conditions of weakness.

55  
56 151

### 57 58 152 ***Phase II. Generation of indications***

59  
60

1  
2  
3  
4  
5  
6  
7  
8  
9  
10  
11  
12  
13  
14  
15  
16  
17  
18  
19  
20  
21  
22  
23  
24  
25  
26  
27  
28  
29  
30  
31  
32  
33  
34  
35  
36  
37  
38  
39  
40  
41  
42  
43  
44  
45  
46  
47  
48  
49  
50  
51  
52  
53  
54  
55  
56  
57  
58  
59  
60

153 The steering committee formulated indications ensuring that all the potentially relevant topics in the  
154 field would be included in the initial list of questions for the first Delphi round. Each indication  
155 included a statement regarding safety about the following PAMs:

- 156 1. Electrical stimulation
- 157 2. Neuromodulation, antalgic and interferential electrical currents
- 158 3. Extracorporeal shock wave therapy
- 159 4. Laser therapy
- 160 5. Electromagnetic therapy
- 161 6. Diathermy
- 162 7. Hot thermal agents
- 163 8. Cryotherapy
- 164 9. Therapeutic ultrasound

165 **Supplementary File 2** reported details about each included PAM.

166 Indications were developed for different target conditions/populations. PAMs are delivered by expert  
167 healthcare professionals (who had undergone formal education and training) to ensure patient safety  
168 in inpatient and outpatient settings. Indications were presented within the relevant rehabilitation field,  
169 along with a list of patient conditions in which the PAMs were indicated as safe and supported by  
170 evidence and clinical expertise. Evidence was recently summarized in a scoping review(10), which  
171 gathered information about the safety of PAMs from 117 systematic reviews in physiotherapy and  
172 rehabilitation medicine. Clinical expertise was assured by content experts of AIFI (e.g.,  
173 musculoskeletal disorders, orthopedic and neurological physiotherapy and pelvic floor  
174 rehabilitation).

### 176 ***Phase III. Voting of indications through Delphi Rounds***

177 We used an electronic Delphi process, allowing participants to submit responses anonymously and  
178 independently without being biased by other participants' identities and responses. The steering

1  
2  
3 179 committee reached the panel of experts using the SurveyMonkey online platform (Palo Alto, CA,  
4  
5 180 USA; [www.surveymonkey.com](http://www.surveymonkey.com)) and used a blinded electronic voting.

7  
8 181 The web-based survey consisted of two sections: the first regarded the participants' demographics  
9  
10 182 (e.g., type of profession, the field of expertise, and years of experience), and the second covered how  
11  
12 183 to vote for indications. The panel of experts evaluated the proposed indications and formulated  
13  
14 184 additional comments using a free text box to ensure complete topic coverage. According to the RAND  
15  
16  
17 185 method, the panel of experts used a 9-point Likert scale (i.e., 1-3 = highly inappropriate, 4-6 =  
18  
19 186 undecided, 7-9 = highly appropriate) for rating the level of concordance for each indication.

20  
21 187 In addition, the experts could abstain from voting, selecting the answer "Not my expertise" for  
22  
23  
24 188 indications they were not familiar with.

25  
26 189 A summary of results for each Delphi round was provided according to the total number of experts  
27  
28 190 voting as feedback to inform panel members on consensus development with feedback and  
29  
30  
31 191 descriptive statistics incorporated for the next round. The panel of experts were asked to re-rate their  
32  
33 192 evaluation in more rounds only for those indications needing clarification or for indications for which  
34  
35 193 consensus (i.e.,  $\geq 75\%$  on a 7-9 points scale or 1-3 points scale) was not reached.

36  
37 194 An anonymous report of each round was provided to each expert, showing the distribution of  
38  
39  
40 195 responses for each indication with all additional comments provided in the free text box. Based on  
41  
42 196 previous voting, indications were modified and presented for the next round. Up to three reminder  
43  
44 197 emails for completion were sent to each component individually. Data collection occurred over 5  
45  
46  
47 198 months (June-November 2022).

48  
49 199

#### 51 200 ***Phase IV. Workshop Meeting as last round***

52  
53 201 After reaching a consensus, the steering committee joined an online meeting to refine indications  
54  
55  
56 202 according to each expert contribution and to confirm which indications would be included in the final  
57  
58 203 criteria list. Finally, the panel of experts was asked to vote on the final indications list for the closing  
59  
60 204 audit procedure.

1  
2  
3 205  
45 206 **Definition and calculation of consensus**

7  
8 207 In agreement with the RAND appropriateness method, we adopted predefined criteria(26) to assess  
9  
10 208 the consensus in the Delphi method using the proportion of ratings with a threshold of 75%.(27)

11  
12 209 Particularly:

13  
14  
15 210

- 16  
17 211 1. Consensus in:  $\geq 75\%$  of participants scored the item as "critical" (score 7 to 9), and  $< 15\%$   
18  
19 212 scored the item as of "limited importance" (score 1 to 3)
- 20  
21 213 2. Consensus out:  $\geq 75\%$  of participants scored the item as of "limited importance" (score 1  
22  
23  
24 214 to 3), and  $< 15\%$  scored the item as "critical" (score 7 to 9)
- 25  
26 215 3. No consensus: All other results.

27  
28 216

29  
30  
31 217 **Statistical Analysis**

32  
33 218 Descriptive statistics were used to describe general characteristic of participants, summarised as mean  
34  
35 219 and standard deviation (SD) or median and interquartile range (IQR) and counts and percentage (%),  
36  
37  
38 220 as appropriate. Each statement was analysed quantitatively by the percentage of agreement ratings.

39  
40 221

41  
42 222 **Role of the Funding Source**

43  
44  
45 223 AIFI supported this research. The funder played no role in this study's design, conduct, or reporting.

46  
47 224

48  
49 225 **Patient and public involvement**

50  
51 226 In this study, a patient representative participated in the panel of experts to rate the indications.

52  
53  
54  
55  
56  
57  
58  
59  
60

1  
2  
3  
4  
5  
6  
7  
8  
9  
10  
11  
12  
13  
14  
15  
16  
17  
18  
19  
20  
21  
22  
23  
24  
25  
26  
27  
28  
29  
30  
31  
32  
33  
34  
35  
36  
37  
38  
39  
40  
41  
42  
43  
44  
45  
46  
47  
48  
49  
50  
51  
52  
53  
54  
55  
56  
57  
58  
59  
60

## 227 RESULTS

### 228 Participants

229 Out of the 28 STS/organizations that were invited as panel of experts, two declined their interest in  
230 participation, while nine did not provide a response. Finally, 17 STS/organizations (61%), each  
231 represented by their most representative expert member, were included (**Figure 2**). The majority of  
232 experts were clinicians (88.2%), with half having expertise in musculoskeletal disorders (47.1%).  
233 Others were specialized in areas such as pelvic floor (23.5%), neurological (17.6%), lymphatic  
234 disorders (5.9%), pediatrics (5.9%). The panel also included a forensic and a lay member as patient  
235 representative. On average, experts had a median of 30 years of experience (interquartile range [IQR]:  
236 17-36) in their respective fields. All general characteristics are reported in **Table 1**. No conflict of  
237 interest was present (**Supplementary File 3**).

[Figure 2]

[Table 1]

### 242 Delphi rounds

243 Two rounds of Delphi were necessary to reach a consensus.

#### 245 Round 1

246 Overall, 17 experts panel participants completed the survey. All indications passed the first round  
247 with a consensus of 75% (**Table 2**). Five experts offered justifications for their choices (e.g., examples  
248 of clinical practice) and gave important inputs for the indications. In particular, they raised concerns  
249 about the safe use of PAMs in children. Additionally, they suggested refining the purpose of the  
250 indications, emphasizing that the focus was on patient safety rather than provider safety.

[Table 2]

1  
2  
3 253 *Round 2*  
4

5 254 Indications of Round 1 were reviewed according to panel comments for the subsequent assessment  
6  
7  
8 255 in Round 2, with a specific restriction on the adult population and a clearer emphasis on patient safety.  
9

10 256 Overall, 14 experts panel participants (82%) completed the survey of Round 2, and all the indications  
11  
12 257 passed with a consensus out of 75%. (**Table 2**). One expert provided additional comments that  
13  
14  
15 258 included examples of expertise, which were subsequently integrated into the final list of indications.  
16

17 259  
18  
19

20 260 *Workshop Meeting*  
21  
22

23 261 On September 27, 2022, nine experts panel participants (53%) joined the online meeting to discuss  
24  
25  
26 262 comments, justifications and highlights. A comprehensive digital presentation of Round 1 and Round  
27  
28 263 2 findings were reported during the workshop. Here, the panel of experts suggested introducing a  
29  
30 264 general note making explicit that indications on safety were not extended to different subgroups of  
31  
32  
33 265 the population (e.g., children, adolescents, frail) due to lack of literature.

34  
35 266 The final list of indications with this general note was shared to reach final approval. All 17 experts  
36  
37 267 panel participants (100%) approved and released the final indications list. One expert voted for the  
38  
39 268 option "Not my expertise" in the indication of the cryotherapy (**Table 2**). In **Appendix 1**, we reported  
40  
41  
42 269 the final criteria list released for good clinical practice with details of sources (evidence and expertise)  
43  
44 270 and applications in different fields, clinical conditions or population settings.  
45  
46  
47  
48  
49  
50  
51  
52  
53  
54  
55  
56  
57  
58  
59  
60

## 1 2 3 271 **DISCUSSION**

### 4 5 272 **Main findings**

6  
7  
8 273 This study aimed to develop indications about the safety of PAMs in physical therapy and  
9  
10 274 rehabilitation medicine. These indications were developed by a steering committee (including clinical  
11  
12 275 and methodological experts) of AIFI and informed by 17 national STS with high expertise in different  
13  
14 276 fields related to physiotherapy and rehabilitation (e.g., orthopedics, neurology), including a forensic  
15  
16  
17 277 scientist and a lay member in the representation of patients.

18  
19 278 The response rate was 61%, defined as a moderate participation.(28) All nine indications were  
20  
21  
22 279 approved in the first round, achieving an important consensus of over 75% agreement. Subsequent  
23  
24 280 adjustments were made, particularly regarding age restrictions (i.e., limited to the adult population)  
25  
26 281 and the refinement of expertise examples during a second round. After a workshop meeting, a general  
27  
28 282 note was added to clarify that the use of PAMs should not be extended to specific population  
29  
30 283 subgroups. All panel experts approved and released the final indications list with overall consensus.  
31  
32  
33 284 In summary, experts agreed on the safety of PAMs in the adult population (>18 years) when  
34  
35 285 prescribed and applied by a healthcare professional (e.g., physiotherapist, physician) who is formed  
36  
37  
38 286 and informed, as required by education and licensure.

### 39 40 287 41 42 288 **Comparison with literature**

43  
44 289 This Delphi represents the most recent consensus on the safety of PAMs. Earlier consensus  
45  
46  
47 290 documents from different organizations were published in 2001,(5) 2006, (6) and 2010.(7) The  
48  
49 291 Canadian guideline is the most comprehensive, covering contraindications and precautions for  
50  
51 292 various PAMs. It involved experts from Canada and the United States, drawing on scientific evidence  
52  
53  
54 293 from multiple sources (including textbooks). However, it is important to note that the evidence was  
55  
56 294 not collected by a clear and rigorous systematic process, potentially missing relevant information,  
57  
58 295 and all these documents could be now outdated. Ideally, guidelines should be updated every three to  
59  
60 296 five years or when new information become available.(29, 30) In 2018, the American Occupational

1  
2  
3 297 Therapy Association issued a position paper(31) clarifying the appropriate use of PAMs in  
4  
5 298 contemporary occupation-based occupational therapy practice, providing clinical case vignettes in  
6  
7  
8 299 their field. Others reported indications and contraindications about specific types of PAMs (e.g.,  
9  
10 300 ESWT (32)). Many other societies, such as National Institute for Clinical Excellence (NICE), also  
11  
12 301 offer specific clinical questions guidelines, and we cannot exclude that they can involve  
13  
14  
15 302 recommendations on PAMs (e.g., NG59 for low back pain(33)).  
16

### 17 303 18 19 304 **Implications for clinicians**

20  
21 305 Healthcare professionals are encouraged to use a comprehensive approach when using this Delphi  
22  
23  
24 306 consensus. Before proposing PAMs to patients, they must collect their medical history (e.g.,  
25  
26 307 comorbidities) during the initial examination to better determine the diagnosis, prognosis, anticipated  
27  
28 308 goals, and expected outcomes for identified impairments, activity limitations, and participation  
29  
30  
31 309 restrictions.(34) Then, they should incorporate the best research evidence, their clinical expertise, and  
32  
33 310 patient values, needs, and preferences to propose effective treatments, balancing effectiveness and  
34  
35 311 safety and informing patients about the possibility of trivial adverse events. For instance, a patient  
36  
37 312 needing ESWT (as additional therapy to optimize clinical outcomes) should be informed about the  
38  
39  
40 313 possible occurrence of pain and erythema(10) at the application site. However, when evidence is  
41  
42 314 lacking or moderate to severe harm is likely, caution is advised, and using PAM may be reconsidered.  
43  
44  
45 315 In fact, for safety purposes, developed indications were not generally extended to other subgroups,  
46  
47 316 such as children, adolescents, and frail people, since limited and insufficient literature on harm is  
48  
49 317 available. Some PAMs could influence the biological tissues in the growth phase in children and  
50  
51 318 adolescents(35). This population has open growth plates, and their ligaments are stronger than the  
52  
53  
54 319 bony attachment sites, where they serve as connectors.(36) As a safety principle, decision-makers  
55  
56 320 adopt precautionary measures when scientific evidence on harms is uncertain, and the population is  
57  
58 321 vulnerable(37) (38, 39) (e.g., people historically considered at risk for being misused in clinical  
59  
60 322 research or for whom a truly voluntary decision may be compromised from a regulatory perspective



1  
2  
3 323 such as children or frail people). All these indications should be adhered to in conjunction with the  
4  
5 324 guidelines and standards established by professional associations, equipment manufacturers' manuals  
6  
7  
8 325 and regulatory bodies.(40)  
9

10 326

11

## 12 327 **Implications for stakeholders**

13  
14 328 Good practices for the safety of patients should be managed by national agencies with a living  
15  
16  
17 329 monitoring system and shared in international initiatives such as the WHO Global Patient Safety  
18  
19 330 Challenge Medication Safety(41) to strengthen systems and practices adopting corrective action  
20  
21  
22 331 within countries. Our consensus could be implemented into the Good Clinical Practices (GCPs) of  
23  
24 332 the Italian Ministry of Health system by Istituto Superiore di Sanità (ISS) for the production of  
25  
26 333 national guidelines and the National Agency for Regional Health Services (Agenzia Nazionale per i  
27  
28 334 Servizi Sanitari Regionali – AGENAS)(42) for reporting any experience of improvement in patient  
29  
30  
31 335 safety made by healthcare organizations. National and international STS should facilitate  
32  
33 336 disseminating CPG in different strategies. On the one hand, STS can promote local experiences of  
34  
35 337 improvement in patient safety stored in shared repository (i.e., AGENAS)(42) in the light of evidence-  
36  
37  
38 338 based consensus (e.g., SAFE PAMP) to facilitate national collaboration between different  
39  
40 339 institutions.

41  
42 340 On the other hand, STS can disseminate a plain, patient-oriented version of good clinical practice  
43  
44  
45 341 indications. We planned to develop patient and stakeholder versions of our evidence-informed and  
46  
47 342 consensus-based indications. We aim to use a conceptual framework based on public health  
48  
49 343 digitalization to put people and patients at the center of care delivery, supporting patient  
50  
51 344 empowerment and making the healthcare system more efficient and safer.(43, 44) For example, we  
52  
53  
54 345 can plan stakeholder meetings, webinars, and education and counseling via pamphlets/videos/and  
55  
56 346 social messages.

57

58 347

59

60 348

## 348 **Implications for research**

1  
2  
3  
4  
5  
6  
7  
8  
9  
10  
11  
12  
13  
14  
15  
16  
17  
18  
19  
20  
21  
22  
23  
24  
25  
26  
27  
28  
29  
30  
31  
32  
33  
34  
35  
36  
37  
38  
39  
40  
41  
42  
43  
44  
45  
46  
47  
48  
49  
50  
51  
52  
53  
54  
55  
56  
57  
58  
59  
60

We believe that indications developed by the multidisciplinary and multi-professionally panel of experts can be generalized worldwide. These results could provide essential information for GCPs to produce national and international guidelines to improve patient safety and decrease avoidable harm related to interventions. Studies should convey their efforts to plan and adequately report adverse events before objectively estimating these harms. We call for multicentric randomized controlled trials based on the core outcome set also for harms and not only for benefit.(45) In addition, specific subgroups of populations should be studied. It is a serious matter to exclude a group from research eligibility, and this must be done only when no less restrictive option is sufficient to ensure protection from undue risk.(46)

Lastly, future studies can better explore our indications to ensure the safest and optimal modality application of the proposed PAMs (e.g., optimal voltage, amperage, frequency, current density, dose), especially for the subgroups mentioned (e.g., age of children).(47)

### **Strength and limitations**

This is the first effort to provide guidance on the safety of PAMs in physiotherapy and rehabilitation. We strictly followed published guidelines for reporting and conduction. In addition, we *a-priori* publicly registered the consensus criterion used to determine agreement within the Delphi process. (26, 48) We adopted one of the most conservative thresholds for obtaining the consensus (75%)(27), and in all rounds, this was reached with a high percentage of agreements. However, some downsides should be acknowledged. We did not cover indications about the clinical effectiveness of PAMs, as our aim was to make patients, healthcare providers and policy-makers aware about the safety application of PAMs in clinical practice. As with all Delphi process, our study rely on national expert response and may not capture the full range of perspectives or experiences.(16, 49) However, we tried to involve multidisciplinary and multi-professional experts (as occurs in clinical practice guidelines) that enable confrontations in anonymity (avoiding negatively influencing outcomes and encouraging balanced consideration of ideas). Then, indications were developed starting from the scoping review,

1  
2  
3  
4  
5  
6  
7  
8  
9  
10  
11  
12  
13  
14  
15  
16  
17  
18  
19  
20  
21  
22  
23  
24  
25  
26  
27  
28  
29  
30  
31  
32  
33  
34  
35  
36  
37  
38  
39  
40  
41  
42  
43  
44  
45  
46  
47  
48  
49  
50  
51  
52  
53  
54  
55  
56  
57  
58  
59  
60

375 which mapped and summarized safety in population and intervention areas without assessing the  
376 evidence level (e.g., grading of the certainty of evidence).(10) For instance, panel experts were not  
377 confident about extending the indications to specific subgroups of patients (e.g., children, adolescents,  
378 frail, etc.) for precautionary reasons of the lack of literature retrieved.

379

## 380 **CONCLUSION**

381 These evidence-based indications inform patients, healthcare professionals, and policy-makers about  
382 the safety of a wide range of PAMs used in physiotherapy and rehabilitation after a comprehensive  
383 clinical evaluation of patients' needs. This consensus can provide a basis for decision-making and  
384 future research.

1  
2  
3 385 **DECLARATIONS**  
4

5 386 **Author Contributions**  
6

7  
8 387 Concept/idea/research design: S. Gianola, S. Bargerì, G. Castellini  
9

10 388 Writing: S. Gianola, S. Bargerì, G. Castellini  
11

12 389 Data collection: S. Gianola, S. Bargerì  
13

14  
15 390 Data analysis: S. Gianola, S. Bargerì  
16

17 391 Project management: S. Gianola, S. Bargerì  
18

19 392 Consultation (including review of manuscript before submitting): S. Gianola, S. Bargerì, L.  
20

21 393 Pellicciari, S. Gambazza, G. Rossetini, A. Fulvio, V. Genovese, M. Benedini, E. Proverbio, S.  
22

23 394 Cecchetto, G. Castellini, A. Turolla, and SAFE PAMP Collaborators  
24  
25

26 395  
27  
28 396 **Ethics Approval**  
29

30  
31 397 This study was declared exempt from institutional review board review.  
32

33 398  
34  
35 399 **Disclosures**  
36

37 400 The authors and SAFE PAMP Collaborators declared they had no conflicts of interest.  
38  
39

40 401  
41  
42 402 **Funding**  
43

44 403 This work was supported and funded by Associazione Italiana di Fisioterapia (AIFI). The APC was  
45  
46 404 funded by AIFI. This research did not receive specific grant from any funding agency in the public,  
47  
48 405 commercial or not-for-profit sectors.  
49  
50

51 406  
52  
53 407 **Data sharing statement**  
54

55  
56 408 Research data are stored in OSF repository <https://osf.io/w8kgs/> (19)  
57

58 409  
59  
60 410 **Manuscript word count:** 3275/4000

1  
2  
3  
4  
5  
6  
7  
8  
9  
10  
11  
12  
13  
14  
15  
16  
17  
18  
19  
20  
21  
22  
23  
24  
25  
26  
27  
28  
29  
30  
31  
32  
33  
34  
35  
36  
37  
38  
39  
40  
41  
42  
43  
44  
45  
46  
47  
48  
49  
50  
51  
52  
53  
54  
55  
56  
57  
58  
59  
60

411 **Figure 1.** Phases of the RAND Delphi process

412 **Figure 2.** Flow chart of Delphi process

413 **Table 1.** General characteristics of experts panels

414 **Table 2.** Agreement results for each round.

For peer review only

1  
2  
3 415 **REFERENCES**  
4

- 5 416 1. McCann J, Roy C, Ward C. Rehabilitation medicine  
6 417 <https://www.bsrm.org.uk/downloads/rehabilitationmedicine-final.pdf>.  
7 418 2. Kreutzer JS, Gervasio AH, Camplair PS. Primary caregivers' psychological status and  
8 419 family functioning after traumatic brain injury. *Brain injury*. 1994;8(3):197-210.  
9 420 3. Caserta MS, Lund DA, Wright SD. Exploring the Caregiver Burden Inventory (CBI): further  
10 421 evidence for a multidimensional view of burden. *International journal of aging & human*  
11 422 *development*. 1996;43(1):21-34.  
12 423 4. Cameron M. *Physical Agents in Rehabilitation*  
13 424 *An Evidence-Based Approach to Practice*. 5th Edition ed: Elsevier; 2016.  
14 425 5. Robertson V, Chipchase L, Laakso L, Whelan K, McKenna L. Guidelines for the clinical  
15 426 use of electrophysical agents. 2001.  
16 427 6. Guidance for the clinical use of electrophysical agents. London: Chartered Society of  
17 428 Physiotherapy; 2006.  
18 429 7. ELECTROPHYSICAL AGENTS - Contraindications And Precautions: An Evidence-Based  
19 430 Approach To Clinical Decision Making In Physical Therapy. *Physiother Can*. 2010;62(5):1-80.  
20 431 8. Iijima H, Takahashi M. Microcurrent Therapy as a Therapeutic Modality for  
21 432 Musculoskeletal Pain: A Systematic Review Accelerating the Translation From Clinical Trials to  
22 433 Patient Care. *Arch Rehabil Res Clin Transl*. 2021;3(3):100145.  
23 434 9. Mendes LA, Lima IN, Souza T, do Nascimento GC, Resqueti VR, Fregonezi GA. Motor  
24 435 neuroprosthesis for promoting recovery of function after stroke. *Cochrane Database Syst Rev*.  
25 436 2020;1(1):Cd012991.  
26 437 10. Barger S, Pellicciari L, Gallo C, Rossetini G, Castellini G, Gianola S, et al. What is the  
27 438 landscape of evidence about the safety of physical agents used in physical medicine and  
28 439 rehabilitation? A scoping review. *BMJ Open*. 2023;13(6):e068134.  
29 440 11. Carlesso LC, Macdermid JC, Santaguida LP. Standardization of adverse event terminology  
30 441 and reporting in orthopaedic physical therapy: application to the cervical spine. *J Orthop Sports*  
31 442 *Phys Ther*. 2010;40(8):455-63.  
32 443 12. Sachse T, Mathes T, Dorando E, Heß S, Thürmann P, Schmiedl S, et al. A review found  
33 444 heterogeneous approaches and insufficient reporting in overviews on adverse events. *J Clin*  
34 445 *Epidemiol*. 2022;151:104-12.  
35 446 13. Moher D, Schulz KF, Simera I, Altman DG. Guidance for developers of health research  
36 447 reporting guidelines. *PLoS Med*. 2010;7(2):e1000217.  
37 448 14. Hasson F, Keeney S, McKenna H. Research guidelines for the Delphi survey technique. *J*  
38 449 *Adv Nurs*. 2000;32(4):1008-15.  
39 450 15. Niederberger M, Spranger J. Delphi Technique in Health Sciences: A Map. *Front Public*  
40 451 *Health*. 2020;8:457.  
41 452 16. Junger S, Payne SA, Brine J, Radbruch L, Brearley SG. Guidance on Conducting and  
42 453 REporting DELphi Studies (CREDES) in palliative care: Recommendations based on a  
43 454 methodological systematic review. *Palliat Med*. 2017;31(8):684-706.  
44 455 17. Equator network. Enhancing the QUALity and Transparency Of health Research  
45 456 <https://www.equator-network.org/reporting-guidelines/credes/>.  
46 457 18. European Commission. Ethics and data protection. [https://ec.europa.eu/info/funding-](https://ec.europa.eu/info/funding-tenders/opportunities/docs/2021-2027/horizon/guidance/ethics-and-data-protection_he_en.pdf)  
47 458 [tenders/opportunities/docs/2021-2027/horizon/guidance/ethics-and-data-protection\\_he\\_en.pdf](https://ec.europa.eu/info/funding-tenders/opportunities/docs/2021-2027/horizon/guidance/ethics-and-data-protection_he_en.pdf).  
48 459 19. [dataset] Gianola, S., Barger S., Castellini, G., Gambazza, S., Rossetini, G., Turolla, A., &  
49 460 Pellicciari, L. Data from: Italian suggestions about the safety of physical agents in physical therapy  
50 461 and rehabilitation medicine. Open Science Framework repository (OSF), October 4, 2023.  
51 462 <https://osf.io/w8kgs/>.  
52 463 20. Associazione Italiana di Fisioterapia (AIFI) <https://aifi.net/>.

1

2

3 464

4 465

5 466

6 467

7 468

8 469

9 470

10 471

11 472

12 473

13 474

14 475

15 476

16 477

17 478

18 479

19 480

20 481

21 482

22 483

23 484

24 485

25 486

26 487

27 488

28 489

29 490

30 491

31 492

32 493

33 494

34 495

35 496

36 497

37 498

38 499

39 500

40 501

41 502

42 503

43 504

44 505

45 506

46 507

47 508

48 509

49 510

50 511

51 512

52 513

53

54

55

56

57

58

59

60

21. Legge 8 marzo 2017, n. 24 Disposizioni in materia di sicurezza delle cure e della persona assistita, nonché in materia di responsabilità professionale degli esercenti le professioni sanitarie. <https://www.gazzettaufficiale.it/eli/id/2017/03/17/17G00041/sg> Accessed on April, 12 2022.

22. Basagni B, Navarrete E, Bertoni D, Catran C, Mapelli D, Oddy M, et al. The Italian version of the Brain Injury Rehabilitation Trust (BIRT) personality questionnaires: five new measures of personality change after acquired brain injury. *Neurological sciences : official journal of the Italian Neurological Society and of the Italian Society of Clinical Neurophysiology*. 2015;36(10):1793-8.

23. Akins RB, Tolson H, Cole BR. Stability of response characteristics of a Delphi panel: application of bootstrap data expansion. *BMC Med Res Methodol*. 2005;5:37.

24. Birko S, Dove ES, Ozdemir V. Evaluation of Nine Consensus Indices in Delphi Foresight Research and Their Dependency on Delphi Survey Characteristics: A Simulation Study and Debate on Delphi Design and Interpretation. *PLoS One*. 2015;10(8):e0135162.

25. Cittadinanzattiva <https://www.cittadinanzattiva.it/>.

26. Grant S, Booth M, Khodyakov D. Lack of preregistered analysis plans allows unacceptable data mining for and selective reporting of consensus in Delphi studies. *J Clin Epidemiol*. 2018;99:96-105.

27. Diamond IR, Grant RC, Feldman BM, Pencharz PB, Ling SC, Moore AM, et al. Defining consensus: a systematic review recommends methodologic criteria for reporting of Delphi studies. *J Clin Epidemiol*. 2014;67(4):401-9.

28. Fincham JE. Response rates and responsiveness for surveys, standards, and the Journal. *Am J Pharm Educ*. 2008;72(2):43.

29. Shekelle PG, Ortiz E, Rhodes S, Morton SC, Eccles MP, Grimshaw JM, et al. Validity of the Agency for Healthcare Research and Quality clinical practice guidelines: how quickly do guidelines become outdated? *Jama*. 2001;286(12):1461-7.

30. Shekelle P, Eccles MP, Grimshaw JM, Woolf SH. When should clinical guidelines be updated? *Bmj*. 2001;323(7305):155-7.

31. Physical Agents and Mechanical Modalities. *Am J Occup Ther*. 2018;72(Supplement 2):7212410055p1-p6.

32. International Society for Medical Shockwave Treatment (ISMST). Consensus statement on ESWT Indications and Contraindications.

[https://www.shockwavetherapy.org/fileadmin/user\\_upload/ISMST\\_Guidelines.pdf](https://www.shockwavetherapy.org/fileadmin/user_upload/ISMST_Guidelines.pdf).

33. de Campos TF. Low back pain and sciatica in over 16s: assessment and management NICE Guideline [NG59]. *J Physiother*. 2017;63(2):120.

34. WCPT. Standards of physical therapy practice <https://world.physio/sites/default/files/2020-07/G-2011-Standards-practice.pdf>.

35. Yeom M, Kim SH, Lee B, Zhang X, Lee H, Hahm DH, et al. Effects of laser acupuncture on longitudinal bone growth in adolescent rats. *Evid Based Complement Alternat Med*. 2013;2013:424587.

36. Nguyen JC, Markhardt BK, Merrow AC, Dwek JR. Imaging of Pediatric Growth Plate Disturbances. *Radiographics*. 2017;37(6):1791-812.

37. European Parliament. The precautionary principle: Definitions, applications and governance [https://www.europarl.europa.eu/thinktank/en/document/EPRS\\_IDA\(2015\)573876](https://www.europarl.europa.eu/thinktank/en/document/EPRS_IDA(2015)573876).

38. Commission. E. The precautionary principle: decision making under uncertainty.

[https://ec.europa.eu/environment/integration/research/newsalert/pdf/precautionary\\_principle\\_decisi\\_on\\_making\\_under\\_uncertainty\\_FB18\\_en.pdf](https://ec.europa.eu/environment/integration/research/newsalert/pdf/precautionary_principle_decisi_on_making_under_uncertainty_FB18_en.pdf). 2017;accessed on July 4 2020.

39. World Commission on the Ethics of Scientific Knowledge T. The precautionary principle. 2005.

40. EUDAMED - European database on medical devices. Available:

<https://ec.europa.eu/tools/eudamed/#/screen/home> [Accessed 30

Aug 2022].



- 1  
2  
3 514 41. WHO Global Patient Safety Challenge on Medication Without Harm.  
4 515 <https://www.who.int/publications/i/item/WHO-HIS-SDS-2017.6>.  
5 516 42. AGENAS. Agenzia Nazionale per i Servizi Sanitari Regionali  
6 517 <https://www.agenas.gov.it/comunicazione/primo-piano/2111-avvio-call-for-good-practice-2022>.  
8 518 43. Odone A, Buttigieg S, Ricciardi W, Azzopardi-Muscat N, Staines A. Public health  
9 519 digitalization in Europe. *Eur J Public Health*. 2019;29(Supplement\_3):28-35.  
10 520 44. Santesso N, Morgano GP, Jack SM, Haynes RB, Hill S, Treweek S, et al. Dissemination of  
11 521 Clinical Practice Guidelines: A Content Analysis of Patient Versions. *Med Decis Making*.  
12 522 2016;36(6):692-702.  
13 523 45. COMET Initiative <https://www.comet-initiative.org/Resources/AdverseEventOutcomes>  
14 524 (Accessed on April 5, 2022).  
16 525 46. Langford A, Bateman-House A. Clinical trials for COVID-19: Populations most vulnerable  
17 526 to COVID-19 must be included. *Health Affairs Blog* Retrieved December. 2020;1.  
18 527 47. Thabet AA, Ebid AA, El-Boshy ME, Almuwallad AO, Hudaimoor EA, Alsaedi FE, et al.  
19 528 Pulsed high-intensity laser therapy versus low level laser therapy in the management of primary  
20 529 dysmenorrhea. *J Phys Ther Sci*. 2021;33(9):695-9.  
22 530 48. De Meyer D, Kottner J, Beele H, Schmitt J, Lange T, Van Hecke A, et al. Delphi procedure  
23 531 in core outcome set development: rating scale and consensus criteria determined outcome selection.  
24 532 *J Clin Epidemiol*. 2019;111:23-31.  
25 533 49. Fink-Hafner D, Dagen T, Doušak M, Novak M, Hafner-Fink M. Delphi Method: Strengths  
26 534 and Weaknesses. *Advances in Methodology and Statistics*. 2019;2:1-19.  
27  
28  
29  
30  
31  
32  
33  
34  
35  
36  
37  
38  
39  
40  
41  
42  
43  
44  
45  
46  
47  
48  
49  
50  
51  
52  
53  
54  
55  
56  
57  
58  
59  
60



1  
2  
3 536 **Tables**

4  
5 537

6 **Table 1. General characteristics of experts panel (n=17)**

| Professional profile*      | Responses N (%) |
|----------------------------|-----------------|
| Clinicians                 | 15 (88.2)       |
| Researchers                | 7 (41.2)        |
| Management                 | 4 (23.5)        |
| <b>Field of expertise*</b> |                 |
| Musculoskeletal            | 8 (47.1)        |
| Pelvic floor disorders     | 4 (23.5)        |
| Neurological               | 3 (17.6)        |
| Lymphatic disorders        | 1 (5.9)         |
| Paediatrics                | 1 (5.9)         |
| Lay member (Patient)       | 1 (5.9)         |
| Forensic member            | 1 (5.9)         |

7  
8  
9  
10  
11  
12  
13  
14  
15  
16  
17  
18  
19  
20  
21  
22  
23  
24  
25  
26  
27  
28  
29  
30  
31  
32  
33  
34 538 \*More than one answer was possible

35

36

37

38

39

40

41

42

43

44

45

46

47

48

49

50

51

52

53

54

55

56

57

58

59

60

539 **Table 2. Agreement results for each round**

| Indications about the safety of...                                | ROUND 1                                                  |                                                             | ROUND 2                                                  |                                                             | FINAL LIST |     |
|-------------------------------------------------------------------|----------------------------------------------------------|-------------------------------------------------------------|----------------------------------------------------------|-------------------------------------------------------------|------------|-----|
|                                                                   | Percentage of agreement (7-9 points on the Likert scale) | Percentage of disagreement (1-3 points on the Likert scale) | Percentage of agreement (7-9 points on the Likert scale) | Percentage of disagreement (1-3 points on the Likert scale) | Approved   | NME |
| Electrical stimulation                                            | 85.7                                                     | 7.1                                                         | 85.7                                                     | 0.0                                                         | 100.0      | 0.0 |
| Neuromodulation, antalgic, and interferential electrical currents | 100.0                                                    | 0.0                                                         | 100.0                                                    | 0.0                                                         | 100.0      | 0.0 |
| Extracorporeal shock wave therapy                                 | 83.3                                                     | 0.0                                                         | 76.9                                                     | 0.0                                                         | 100.0      | 0.0 |
| Laser therapy                                                     | 84.6                                                     | 7.7                                                         | 90.9                                                     | 0.0                                                         | 100.0      | 0.0 |
| Electromagnetic therapy                                           | 81.8                                                     | 9.1                                                         | 76.9                                                     | 0.0                                                         | 100.0      | 0.0 |
| Diathermy                                                         | 90.0                                                     | 10.0                                                        | 84.6                                                     | 0.0                                                         | 100.0      | 0.0 |
| Hot thermal agents                                                | 81.8                                                     | 9.1                                                         | 91.7                                                     | 0.0                                                         | 100.0      | 0.0 |
| Cryotherapy                                                       | 75.0                                                     | 0.0                                                         | 90.9                                                     | 0.0                                                         | 94.2       | 5.8 |
| Therapeutic ultrasound                                            | 90.9                                                     | 0.0                                                         | 91.7                                                     | 0.0                                                         | 100.0      | 0.0 |
| General note <sup>^</sup>                                         | -                                                        | -                                                           | -                                                        | -                                                           | 100.0      | 0.0 |

540 <sup>^</sup>added for the Final Criteria List

541 Abbreviations: NME: not my expertise

1  
2  
3  
4  
5  
6  
7  
8  
9  
10  
11  
12  
13  
14  
15  
16  
17  
18  
19  
20  
21  
22  
23  
24  
25  
26  
27  
28  
29  
30  
31  
32  
33  
34  
35  
36  
37  
38  
39  
40  
41  
42  
43  
44  
45  
46  
47  
48  
49  
50  
51  
52  
53  
54  
55  
56  
57  
58  
59  
60

## 542 **Appendix 1. Final criteria list**

### 543 **Introduction**

544 The indications are focused on adult population. Each indication was developed based on the  
545 scientific literature (i.e., evidence) and experience of content experts of Associazione Italiana di  
546 Fisioterapia - AIFI (i.e., expertise) with details for clinical conditions/populations in the relevant  
547 rehabilitation fields.

548 *Target group:* indications were developed for adults (> 18 years). Physical agents modalities are  
549 delivered by expert healthcare professionals (who had undergone formal education and training) to  
550 ensure patient safety in both inpatient and outpatient settings.

551 *Condition/population of application:* indications were presented within the relevant rehabilitation  
552 field according to *informed-evidence* and *expertise-based* consensus.

553 *Evidence:* This section has been defined on the basis of a scoping review of the literature conducted  
554 by two independent reviewers that focused on safety of PAMs from 117 systematic reviews in  
555 physiotherapy and rehabilitation medicine (10).

556 *Expertise:* this section has been formulated by the steering committee which included different  
557 content experts of AIFI (e.g., neurological, musculoskeletal, pelvic floor, physical therapies), with  
558 additional inputs from the multidisciplinary and multi-professional panel of experts.

### 559 **Final list of indications**

560 **1. Electrical stimulation (e.g., Functional electrical stimulation (FES), Neuromuscular**  
561 **electrical stimulation (NMES), Electrical muscle stimulation (EMS)) is safe in the adult**  
562 **population**

1  
2  
3 563 - *in musculoskeletal disorders, especially in the following conditions:*

4  
5  
6 564 o Evidence: neck pain, knee osteoarthritis, musculoskeletal pain, muscle hypotrophy.

7  
8  
9  
10 565 o Expertise: spinal osteoarthritis, knee osteoarthritis, musculoskeletal pain, knee  
11  
12 566 osteoarthritis, muscle and joint pain.

13  
14  
15  
16 567 - *in pelvis-perineal disorders, especially in the following conditions:*

17  
18  
19 568 o Evidence: urinary incontinence, fecal incontinence, lower urinary tract symptoms in  
20  
21  
22 569 postpartum women, overactive bladder.

23  
24  
25 570 o Expertise: prolapse, descending perineum syndrome, perineal hypotonia, bladder-sphincter  
26  
27 571 or anorectal dyssynergia, erectile dysfunction, premature ejaculation, abdominal diastasis.

28  
29  
30  
31 572 - *in neurological disorders, especially in the following conditions:*

32  
33  
34 573 o Evidence: migraine, spasticity in multiple sclerosis, stroke, spinal cord injury.

35  
36  
37  
38 574 o Expertise: post-stroke urinary incontinence, neurogenic bowel dysfunction in spinal cord  
39  
40 575 injury, second motor neuron disease (e.g., Amyotrophic Lateral Sclerosis), muscular  
41  
42 576 dystrophies, head trauma, lesions of the peripheral nervous system.

43  
44  
45  
46 577  
47  
48  
49 578 **2. Neuromodulation, antalgic and interferential electrical currents (e.g., TransCutaneous**  
50  
51  
52 579 **Electrical Nerve Stimulation (TENS), Transcutaneous Tibialis Posterior Stimulation (TTNS))**  
53  
54 580 **are safe in the adult population**

55  
56  
57 581 - *in musculoskeletal disorders, especially in the following conditions:*

1  
2  
3  
4  
5  
6  
7  
8  
9  
10  
11  
12  
13  
14  
15  
16  
17  
18  
19  
20  
21  
22  
23  
24  
25  
26  
27  
28  
29  
30  
31  
32  
33  
34  
35  
36  
37  
38  
39  
40  
41  
42  
43  
44  
45  
46  
47  
48  
49  
50  
51  
52  
53  
54  
55  
56  
57  
58  
59  
60

582 o Evidence: low back pain, neck pain, rotator cuff disease, whiplash-associated disorders,  
583 fibromyalgia.

584 o Expertise: musculoskeletal pain, spine osteoarthritis, neuropathic pain.

585 - *in pelvis-perineal disorders, especially in the following conditions:*

586 o Evidence: overactive bladder, urinary incontinence, fecal incontinence, persistent pelvic  
587 pain.

588 o Expertise: Urinary incontinence, pudendal neuralgia, constipation, urinary retention.

589 - *in neurological disorders, especially in the following conditions:*

590 o Evidence: neuropathic pain, stroke, multiple sclerosis, neurogenic bowel dysfunction after  
591 spinal cord injury.

592 o Expertise: neurogenic bladder dysfunction after central and peripheral nervous system  
593 injuries.

### 594 3. Extracorporeal shock wave therapy (radial and focal) is safe in the adult population

596 - *in musculoskeletal disorders, especially in the following conditions:*

597 o Evidence: soft tissue disorders of the lower limbs, knee tendinopathy, Achilles  
598 tendinopathy, osteoarthritis, plantar fasciitis, rotator cuff disease, shoulder tendinopathy and  
599 calcifications, acute fracture, orthopedic disorders, consolidation delays, other soft tissue  
600 disorders.

1  
2  
3 601 o Expertise: enthesopathies of the upper and lower limbs, calcifications, epicondylitis,  
4  
5 602 epitrocleitis, muscle injuries, muscle contractures, and trigger points.  
6  
7

8  
9 603 - in neurological disorders, especially in the following conditions:  
10  
11

12 604 o Evidence: post-stroke lower limb spasticity, multiple sclerosis spasticity.  
13  
14

15 605 o Expertise: spasticity following head trauma, spasticity following spinal cord injury.  
16  
17  
18

19 606 - in pelvis-perineal disorders, especially in the following conditions:  
20  
21  
22

23 607 o Evidence: chronic prostatitis/chronic pelvic pain syndrome.  
24  
25

26 608 o Expertise: persistent female pelvic pain, Peronye disease.  
27  
28

29  
30 609 Patients should be informed of the potential undesirable effects after applying ESWT. Indeed, a  
31  
32 610 recent literature review showed some expected mild adverse events, such as pain and erythema, at  
33  
34 611 the application site.(10)  
35  
36  
37

38 612

39  
40  
41 613 **4. Laser therapy (e.g., low-level laser therapy (LLLT), high-level laser therapy (HLLT)) is**  
42  
43 614 **safe in the adult population**  
44  
45

46  
47 615 - in musculoskeletal disorders, especially in the following conditions:  
48  
49

50 616 o Evidence: low back pain, Achilles tendinopathy, rotator cuff disease, capsulitis adhesive,  
51  
52 lower extremity soft tissue disorders, frozen shoulder, carpal tunnel syndrome, knee  
53 617  
54  
55 618 osteoarthritis, neck pain, whiplash associated disorders.  
56  
57  
58  
59  
60

1  
2  
3 619 o Expertise: upper and lower limb tendinopathy, acute arthropathy, acute muscle and tendon  
4  
5 620 injuries, acute musculoskeletal pain. Upper and lower limb tendinopathy, acute arthropathy,  
6  
7  
8 621 acute muscle and tendon injury, and acute musculoskeletal pain.

9  
10  
11 622 - *in pelvis-perineal disorders (extracavitary LLLT only), especially in the following conditions:*

12  
13  
14  
15 623 o Evidence: Urinary incontinence and pelvic organ prolapse, persistent pelvic pain.

16  
17  
18 624 o Expertise: healing (episiotomies, laparotomies, lacerations, etc.), inflammatory pelvic  
19  
20 625 pain, edema or perineal hematomas.

21  
22  
23  
24 626 - *in lymphatic disorders (LLLT only), especially in the following conditions:*

25  
26  
27 627 o Evidence: secondary lymphoedema (e.g., breast cancer-related lymphedema).

28  
29  
30  
31 628 o Expertise: lymphoedema

32  
33  
34 629 - *in neurological disorders (LLLT only), especially in the following conditions:*

35  
36  
37  
38 630 o Evidence: Bell's palsy

39  
40  
41 631 o Expertise: stroke, multiple sclerosis, spinal cord injury, head trauma, peripheral nerve  
42  
43 632 injury.

44  
45  
46  
47 633 **5. Electromagnetic therapy (e.g., Pulsed ElectroMagnetic Field Therapy (PEMFT), repetitive**  
48  
49 634 **Peripheral Magnetic Stimulation (rPMS)) is safe in the adult population**

50  
51  
52  
53 635 - *in musculoskeletal disorders, especially in the following conditions:*

54  
55  
56 636 o Evidence: neck pain, fractures, consolidation delays.

57  
58  
59  
60 637 o Expertise: osteoporosis, bone edema, algodystrophy, arthrosis.

1  
2  
3 638 - in pelvis-perineal disorders, especially in the following conditions:  
4  
5

6  
7 639 o Evidence: persistent pelvic pain and urinary incontinence.  
8  
9

10 640 o Expertise: fecal incontinence, prolapse, descending perineum syndrome, perineal  
11  
12 641 hypotonia, vesico-sphincteric or anorectal dyssynergia, pudendal neuralgia, pelvic pain  
13  
14 642 acute, erectile dysfunction, premature ejaculation, diastasis recti.  
15  
16  
17

## 18 643 **6. Diathermy (e.g., Short Wave Tecar Therapy) is safe in the adult population**

19  
20

21  
22 644 - in musculoskeletal disorders, especially in the following conditions:  
23  
24

25 645 o Evidence: rotator cuff disease, knee osteoarthritis.  
26  
27

28  
29 646 o Expertise: sub-acute/persistent muscle injuries, DOMS/DOMER, arthropathies (non-  
30  
31 647 acute), osteoarthritis, muscle contractures, trigger points.  
32  
33

34 648 - in pelvis-perineal disorders, especially in the following conditions:  
35  
36  
37

38 649 o Evidence: inflammatory pelvic pain, persistent pelvic pain, sexual dysfunction (Peronye's  
39  
40 650 disease).  
41  
42

43  
44 651 o Expertise: prolapse, stress urinary incontinence, scarring (episiotomies, laparotomies,  
45  
46 652 lacerations, etc.), perineal edema or hematoma, vulvovaginal dystrophy and dryness,  
47  
48 653 abdominal diastasis.  
49  
50

## 51 654 **7. Hot thermal agent modalities (e.g., drug-free heat wrap) are safe in the adult population**

52  
53  
54

55 655 - in musculoskeletal disorders, especially in the following conditions:  
56  
57

58  
59 656 o Evidence: groin pain, low back pain.  
60



- 1  
2  
3 657 o Expertise: sub-acute/persistent muscle injuries, DOMS/DOMER, arthropathies (non-  
4  
5 658 acute), osteoarthritis  
6  
7  
8

9 659

10  
11  
12 **8. Cryotherapy (e.g., ice or liquid nitrogen) is safe in the adult population**  
13

14  
15  
16 661 - *in musculoskeletal disorders, especially in the following conditions:*  
17

18  
19 662 o Evidence: arthroscopy, reconstruction of the anterior cruciate ligament, post-surgery.  
20

21  
22  
23 663 o Expertise: Delayed Onset Muscle Soreness (DOMS)/Delayed Onset Muscle Soreness  
24  
25 664 (DOMER), post-surgery, post-trauma (48h).  
26

27  
28  
29 665

30  
31  
32 **9. Therapeutic Ultrasound is safe in the adult population**  
33

34  
35 667 - *in musculoskeletal disorders, especially in the following conditions:*  
36

37  
38  
39 668 o Evidence: back pain, neck pain, carpal tunnel, rotator cuff disorder, lower limb soft-tissue  
40  
41 669 disorder, knee osteoarthritis, fracture, acute fracture, ankle fracture, ankle and knee sprains,  
42

43  
44  
45 670 o Expertise: hand and foot osteoarthritis, calcifications, enthesitis.  
46

47  
48 **General notes and considerations related to subgroups:**  
49

50  
51  
52 672 Following a confirmed clinical prescription, applying the above physical therapies is safe in the  
53  
54 673 adult population (>18 years) under the supervision of an expert operator. For precautionary reasons,  
55  
56 674 these indications are not extended to other subgroups of patients (e.g., children, adolescents, frail,  
57  
58  
59 675 etc.) since insufficient literature is available.  
60

1  
2  
3 676  
4  
5  
6  
7  
8  
9  
10  
11  
12  
13  
14  
15  
16  
17  
18  
19  
20  
21  
22  
23  
24  
25  
26  
27  
28  
29  
30  
31  
32  
33  
34  
35  
36  
37  
38  
39  
40  
41  
42  
43  
44  
45  
46  
47  
48  
49  
50  
51  
52  
53  
54  
55  
56  
57  
58  
59  
60

For peer review only

1  
2  
3  
4  
5  
6  
7  
8  
9  
10  
11  
12  
13  
14  
15  
16  
17  
18  
19  
20  
21  
22  
23  
24  
25  
26  
27  
28  
29  
30  
31  
32  
33  
34  
35  
36  
37  
38  
39  
40  
41  
42  
43  
44  
45  
46  
47  
48  
49  
50  
51  
52  
53  
54  
55  
56  
57  
58  
59  
60

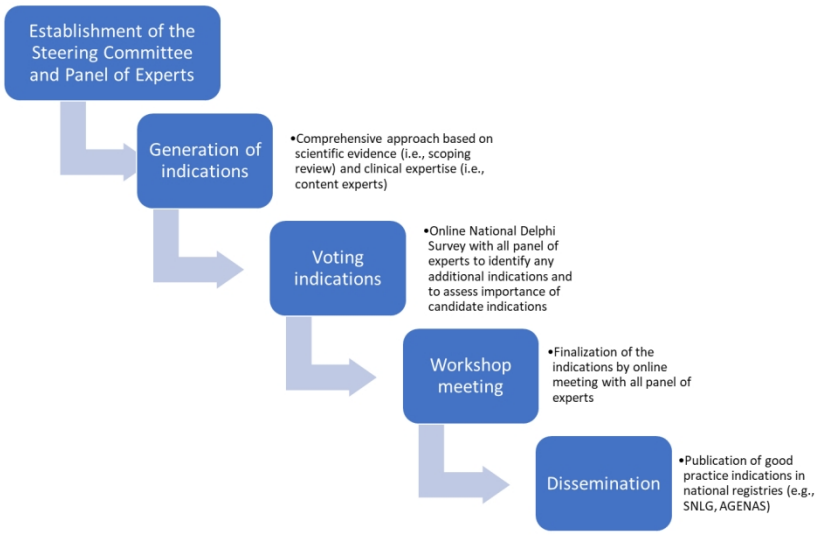

Figure 1

282x150mm (150 x 150 DPI)

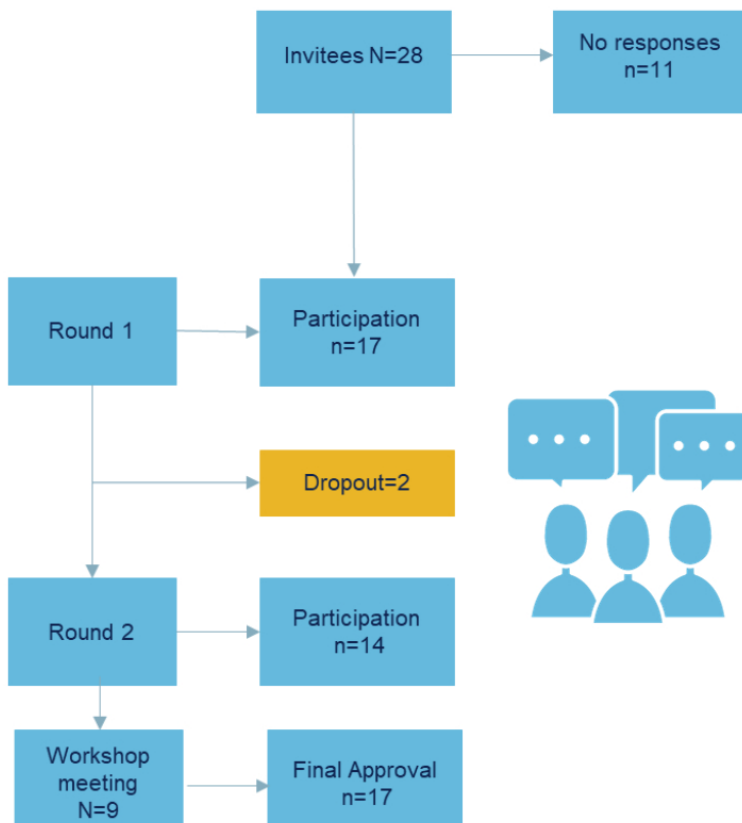

Figure 2

628x526mm (38 x 38 DPI)

1  
2  
3  
4  
5  
6  
7  
8  
9  
10  
11  
12  
13  
14  
15  
16  
17  
18  
19  
20  
21  
22  
23  
24  
25  
26  
27  
28  
29  
30  
31  
32  
33  
34  
35  
36  
37  
38  
39  
40  
41  
42  
43  
44  
45  
46  
47  
48  
49  
50  
51  
52  
53  
54  
55  
56  
57  
58  
59  
60

**Supplementary Files**

*Supplementary File 1. Ethical considerations* .....2  
*Supplementary File 2. Physical agent modalities description*.....3  
*Supplementary File 3. SAFE PAMP Collaborators*.....6  
**REFERENCES**.....8

For peer review only

## Supplementary File 1. Ethical considerations

Participation in the Delphi survey is voluntary and by invitation. The questionnaire includes a beginning section to acquire consent and privacy for data processing. Participants are informed that the responses will have 'remained total confidentiality according to the Regulation on the protection of personal data' 679/2016 of the European Union, and that the results will be used for research purposes and a document shared at the corporate level<sup>1</sup>. The interested party may be interested in the rights provided for by art. 15, 16, 17, 18, 20, 21 and 22 of the Regulation mentioned above.

Database randomization and differential privacy access were achieved. In addition, "anonymization" by generalizing was performed.<sup>2</sup> The study project and data collection were managed and anonymously entrusted by the Unit of Clinical Epidemiology of IRCCS Istituto Ortopedico Galeazzi based in Milano. The data subject cannot be re-identified and is therefore outside the scope of the data protection law<sup>3</sup>.

The row dataset was accessible to two researchers (SG, SB) excluded from participation in Delphi for the quantitative and qualitative analyses. This practice complies with the European standards for the use of aggregative data where the data subject cannot be re-identified, are not personal data and are therefore outside the scope of data protection law<sup>3</sup>. The final report only contains aggregate data. In the final document, we reported the names of the participants who have completed all rounds and gave their consent to disclose their names.

## Supplementary File 2. Physical agent modalities description

1) **Electrical stimulation:** electrotherapeutic currents and waveforms to facilitate neuromuscular or sensory activity to improve muscle strength and reeducate muscle function.<sup>4</sup>

- Neuromuscular electrical stimulation (NMES): use of pulsed currents to stimulate motor nerves, which in turn produce tetanic contractions of the neuromuscular spindles, with or without joint movement.<sup>5</sup>
- Functional Electrical Stimulation (FES) uses electrical pulses to stimulate motor neurons or denervated muscle fibers directly to elicit a contraction during a functional activity (e.g., gait). FES is used in the treatment of orthopedic and neurological conditions.<sup>6</sup>

2) **Neuromodulation, analgic and interferential electrical currents :** electrotherapeutic currents and waveforms to influence physiological effects on the patient's body structures and functions aiming to modulate pain.<sup>4</sup>

- Transcutaneous electrical nerve stimulation (TENS): delivers electrical stimulation via electrodes placed over the intact skin surface near the source of pain to produce analgesia or hypoalgesia. A wide variety of pulsed waveforms are used, with frequencies typically in the range of 1-100Hz. The intensities are set to produce sensory stimulations alone or in combination with motor stimulations to produce muscle twitches (acupuncture-like TENS).<sup>7</sup>
- Transcutaneous Tibialis Posterior Stimulation (TTNS): a form of neuromodulation involving the use of electrical impulses to address urinary symptoms (e.g. overactive bladder) with inhibitory action on neurons of the spinothalamic tract (S2-S3).<sup>8</sup>
- Interferential current (IC): involves crossing two medium frequency currents (most commonly 4000 Hz), which reportedly generates a low-frequency 'beating' (amplitude-modulated) effect at between 0 and 150 Hz in the deep tissues.<sup>9</sup> These beat frequencies are believed to decrease pain, increase circulation and block nerve conduction.

3) **Extracorporeal shock wave therapy:** a nonsurgical treatment that uses the phenomenon of mechanotransduction (i.e., adapting cells biochemical activity, influencing cells migration, proliferation, differentiation and apoptosis)<sup>10 11</sup> to treat various musculoskeletal conditions (e.g., plantar fasciitis; tennis elbow). Shock wave therapy can be either extracorporeal or radial.<sup>12</sup>

- Extracorporeal shock wave therapy (ESWT) involves passing sound waves (or shock waves) through the skin to the affected area. Shock waves are single pulsed acoustic or sonic waves, which dissipate mechanical energy at the interface of two substances with different acoustic impedance.<sup>13</sup> They are produced by generators of an electrical energy source and require an electroacoustic conversion mechanism and a focusing

1  
2  
3 device. Three types of systems can be distinguished based upon the sound source:  
4 electrohydraulic, electromagnetic and piezoelectric systems. Various doses appear to  
5 be used, with no apparent consensus on the minimum therapeutic dose. As defined  
6 defined by Cacchio 2006<sup>14</sup> as low-energy shock waves is less than 0.1 mJ/mm<sup>2</sup> and  
7 high-energy shock waves: is 0.2 mJ/mm<sup>2</sup> to 0.4 mJ/mm<sup>2</sup>).

- 8  
9 - Radial shock wave therapy (RSWT) is generated through the acceleration of a  
10 projectile inside the handpiece of the treatment device and then transmitted radially  
11 from the tip of the applicator to the target zone. Radial shock waves show a lower  
12 peak pressure and a considerably longer rise time than extracorporeal shock waves.  
13 In RSWT, the focal point is not centred on a target zone, as occurs in focal ESWT,  
14 but on the tip of the applicator.<sup>14</sup>

15  
16  
17 **4) Laser therapy:** light source treatment, non-invasive, widely used to treat various  
18 musculoskeletal conditions.

- 19  
20  
21 - Low-level laser therapy (LLLT) generates a beam of light with a particular  
22 wavelength that can deliver light energy to tissue depths below the dermis<sup>15</sup>.  
23 Studies suggest that LLLT contributes to pain relief by reducing pro-inflammatory  
24 cytokines<sup>16</sup>. The effects of LLLT are considered to be dependent on dosage,  
25 wavelength, site and duration of treatment.<sup>15 16</sup>
- 26  
27  
28 - high level laser therapy (HLLT): laser with an output power greater than 500 mW  
29 or 0.5 Watts. HLLT creates heat on the surface of the skin due to their higher power  
30 density (irradiance).<sup>17</sup>

31  
32  
33  
34 **5) Electromagnetic therapy:** based on Faraday's law of electromagnetic induction, to promote  
35 bone healing, treat osteoarthritis and inflammatory diseases of the musculoskeletal system,  
36 alleviate pain, enhance healing of ulcers and reduce spasticity<sup>18</sup>.

37  
38 - Pulsed Electromagnetic Field therapy (PEMF), which involves the delivery of pulsing (that  
39 is 'on-off') low-frequency magnetic fields through the body, which is believed to provide  
40 temporary pain relief by influencing tissue generation and cell proliferation.<sup>19</sup>

41  
42  
43 - Repetitive magnetic stimulation (rMS), which allows the transcutaneous induction of nerve  
44 stimulating electric currents. This technique requires extremely strong and sharp magnetic  
45 impulses (for example 15,000 amperes peak current; 2.5 T field strength; < 1 msec) applied  
46 by specially designed coils (< 10 cm) over the target area. Modern devices allow the repetition  
47 of up to 60 impulses per second. Mainly developed to study and influence brain functions,  
48 rMS also stimulates spinal chord fibres and peripheral nerves. Initial studies used peripheral  
49 rMS for therapeutic reasons, such as in myofascial pain syndrome<sup>20</sup>. Since the resulting small  
50 electric impulses are the nerve stimulating factor, rMS effects may be similar to TENS.

51  
52  
53  
54 **6) Shortwave and microwave Diathermy**

- 55  
56 - Tecartherapy or radiofrequency diathermy (RFD) is a non-invasive therapy and  
57 consists in the emission of high-frequency electromagnetic waves which increase  
58 tissue metabolism. This process promotes tissue repair and affects pain  
59 sensitivity.<sup>21 22 23</sup>



- 1  
2  
3  
4  
5  
6  
7  
8  
9  
10  
11  
12  
13  
14  
15  
16  
17  
18  
19  
20  
21  
22  
23  
24  
25  
26  
27  
28  
29  
30  
31  
32  
33  
34  
35  
36  
37  
38  
39  
40  
41  
42  
43  
44  
45  
46  
47  
48  
49  
50  
51  
52  
53  
54  
55  
56  
57  
58  
59  
60
- Microwave diathermy: a deep heating modality that converts electromagnetic energy to thermal energy. Frequencies approved for therapeutic microwave are 915 MHz (wavelength 33 cm) and 2,456 MHz (wavelength 12 cm). The lower frequency has the advantage of increased depth of penetration but also the disadvantages of greater beam dispersion and the requirement of larger applicators. If muscle heating is primary objective, 915-MHz applicators are preferable to 2,456-MHz applicators. Average temperatures of approximately 41°C at a depth of 1–3 cm have been demonstrated<sup>24</sup>

- 7) **Hot thermal agents:** heat transferred from an object with direct contact to the body. Heat therapy include hot packs, heatwraps, hot/warm water immersion, sauna. Heat treatment increases metabolism in tissues, promotes blood circulation and reduces pain. The temperature of the heat therapy is generally 35–40°C.<sup>25 26</sup>
- 8) **Cryotherapy:** cold is transferred from an object with direct contact to the body. Examples include cold packs, cold-water immersion ( $\leq 15^{\circ}\text{C}$ ), ice massage, the novel modality of cryotherapy. Cryotherapy is a treatment involving very short exposures to extremely cold dry air to the whole patient or a treatment area (mean temperature of the cryotherapy chamber is at  $-30^{\circ}\text{C}$ ,  $-80$  to  $-110^{\circ}\text{C}$ , or  $< -110^{\circ}\text{C}$ ). Cold treatment is thought to reduce swelling and cell metabolism, minimizing oedema, pain and injury.<sup>25 27</sup>
- 9) **Therapeutic Ultrasound:** delivers energy to deep tissue sites through ultrasonic waves (often at frequencies of 1 or 3 MHz and intensities between 0.1 watts/cm<sup>2</sup> and 3 watts/cm<sup>2</sup>) using a crystal sound head. Treatment can be delivered in two forms, continuous (non- stop ultrasonic waves) and pulsed (intermittent ultrasonic waves<sup>22 28</sup>). The treatment aim to increase tissue temperature and induce non-thermal physiological changes (such as cell permeability and cell growth), which are believed to promote soft tissue healing and muscle relaxation.<sup>29</sup>

### Supplementary File 3. SAFE PAMP Collaborators

| Name and Surname           | Affiliations                                                                                                         | STS                                                                                                                                                          | COI  |
|----------------------------|----------------------------------------------------------------------------------------------------------------------|--------------------------------------------------------------------------------------------------------------------------------------------------------------|------|
| <b>Armando Perrotta</b>    | IRCCS Neuromed, Pozzilli (IS)                                                                                        | Società Italiana per lo Studio delle Cefalee (SISC)                                                                                                          | None |
| <b>Viviana Rosati</b>      | A.U.O. Policlinico Umberto I                                                                                         | Società Italiana di Riabilitazione Neurologica (SIRN)                                                                                                        | None |
| <b>Enrico Marinelli</b>    | Department of Anatomical, Histological, Forensic, and Orthopedic Sciences, "Sapienza" University of Rome             | Società Italiana di Medicina Legale e delle Assicurazioni (SIMLA) - Dipartimento di Scienze Biotecnologiche e Medico-chirurgiche Università di Roma Sapienza | None |
| <b>Bianca Masturzo</b>     | Obstetrics and Gynecology department. Ospedale degli infermi. Ponderano (Biella)                                     | Associazione degli Ostetrici e Ginecologi Ospedalieri Italiani (AOGOI)                                                                                       | None |
| <b>Mauro Roselli</b>       | ASL CittadiTorino-Ospedale Martini-S.C. Ortopedia e Traumatologia                                                    | Ortopedici Traumatologi Ospedalieri d'Italia (OTODI)                                                                                                         | None |
| <b>Stefano Vercelli</b>    | Laboratorio di Ricerca in Riabilitazione 2rLab, Dipartimento Economia Aziendale, Sanità e Sociale. SUPSI. Manno (CH) | Federazione Italiana delle Associazione Scientifiche di Fisioterapia (FIASF)                                                                                 | None |
| <b>Gianmarco Rea</b>       | Asl Latina, 04100 Latina, Italy                                                                                      | Società Italiana di Medicina Generale e delle Cure Primarie (SIMG)                                                                                           | None |
| <b>Gianfranco Lamberti</b> | Dipartimento Medicina Riabilitativa AUSL Piacenza                                                                    | Società Italiana di Urologia (SIUD)                                                                                                                          | None |
| <b>Roberto Bortolotti</b>  | UO Reumatologia Ospedale S.Chiara, Trento                                                                            | Società Italiana di Reumatologia (SIR)                                                                                                                       | None |
| <b>Chiara Torresetti</b>   | Paideia International Hospital                                                                                       | Associazione Italiana di Urologia Ginecologia e del Pavimento Pelvico (AIUG)                                                                                 | None |
| <b>Fabio Bandini</b>       | Department of Neurology, ASL 3 Genovese, Genova, Italy                                                               | Società Italiana Neurologia (SIN)                                                                                                                            | None |
| <b>Giuseppe Botta</b>      | Istituto Fisioterapico Michelangelo di Arezzo                                                                        | Società Italiana di Flebologia (SIFL)                                                                                                                        | None |
| <b>Giancarlo Tancredi</b>  | Pediatric Department. Sapienza Università di Roma                                                                    | Società Italiana di Pediatria (SIP)                                                                                                                          | None |

1  
2  
3  
4  
5  
6  
7  
8  
9  
10  
11  
12  
13  
14  
15  
16  
17  
18  
19  
20  
21  
22  
23  
24  
25  
26  
27  
28  
29  
30  
31  
32  
33  
34  
35  
36  
37  
38  
39  
40  
41  
42  
43  
44  
45  
46

|                           |                                                                                                                              |                                                            |      |
|---------------------------|------------------------------------------------------------------------------------------------------------------------------|------------------------------------------------------------|------|
| <b>Luigi Nappi</b>        | Department of Medical and Surgical Sciences<br>Policlinico Riuniti di Foggia, University of Foggia                           | Società Italiana Di Ginecologia E Ostetricia (SIGO)        | None |
| <b>Marco Scorcu</b>       | Servizio di Medicina dello Sport e dell'Esercizio Fisico,<br>Cagliari, ATS Sardegna, Cagliari, Italy                         | Federazione Medico Sportiva Italiana (FMSI)                | None |
| <b>Monica Pierattelli</b> | Presidente SICuPP Toscana, Pediatra di libera scelta Campi<br>Bisenzio (FI)                                                  | Societa' Italiana Delle Cure Primarie Pediatriche (SICuPP) | None |
| <b>Carla Berliri</b>      | Cittadinanzattiva- APS - Sede Nazionale -Staff area Salute -<br>Tribunale per i Diritti del Malato - Politiche della Salute- | Cittadinanzattiva - APS                                    | None |

Abbreviations: COI, Conflict of Interest; STS, Scientific and Technical Societies

## REFERENCES

1. Regolamento generale sulla protezione dei dati. Regolamento (UE) 2016/679 del Parlamento europeo e del Consiglio del 27 aprile 2016. Available at <https://www.garanteprivacy.it/documents/10160/0/Regolamento+UE+2016+679.+Arricchito+con+riferimenti+ai+Considerando+Aggiornato+alle+rettifiche+pubblicate+sulla+Gazzetta+Ufficiale++dell%27Unione+europea+127+del+23+maggio+2018>.
2. [https://ec.europa.eu/justice/article-29/documentation/opinion-recommendation/files/2014/wp216\\_en.pdf](https://ec.europa.eu/justice/article-29/documentation/opinion-recommendation/files/2014/wp216_en.pdf).
3. [https://commission.europa.eu/sites/default/files/5\\_h2020\\_ethics\\_and\\_data\\_protection\\_0.pdf](https://commission.europa.eu/sites/default/files/5_h2020_ethics_and_data_protection_0.pdf).
4. Bellew JW. Foundations of Clinical Electrotherapy. In: Bellew JW, Michlovitz SL, Nolan Jr TP, eds. Modalities for Therapeutic Intervention, 6e. New York, NY: McGraw-Hill Education 2016.
5. Lake DA. Neuromuscular electrical stimulation. An overview and its application in the treatment of sports injuries. *Sports Med* 1992;13(5):320-36. doi: 10.2165/00007256-199213050-00003 [published Online First: 1992/05/01]
6. Martin R, Sadowsky C, Obst K, et al. Functional electrical stimulation in spinal cord injury:: from theory to practice. *Top Spinal Cord Inj Rehabil* 2012;18(1):28-33. doi: 10.1310/sci1801-28 [published Online First: 2012/01/01]
7. Jones I, Johnson MI. Transcutaneous electrical nerve stimulation. *Continuing Education in Anaesthesia Critical Care & Pain* 2009;9(4):130-35. doi: 10.1093/bjaceaccp/mkp021
8. Mallmann S, Ferla L, Rodrigues MP, et al. Comparison of parasacral transcutaneous electrical stimulation and transcutaneous posterior tibial nerve stimulation in women with overactive bladder syndrome: A randomized clinical trial. *Eur J Obstet Gynecol Reprod Biol* 2020;250:203-08. doi: 10.1016/j.ejogrb.2020.05.005 [published Online First: 2020/05/29]
9. Beatti A, Rayner A, Souvlis T, et al. The analgesic effect of interferential therapy on clinical and experimentally induced pain. *Physical Therapy Reviews* 2010;15(4):243-52. doi: 10.1179/174328810X12647087218992
10. Ingber DE. Mechanobiology and diseases of mechanotransduction. *Ann Med* 2003;35(8):564-77. doi: 10.1080/07853890310016333 [published Online First: 2004/01/08]
11. T. Watson e E. L. Nussbaum, Electrophysical Agents. Evidence-based Practice. 13th Edition, Amsterdam, The Netherlands: Elsevier Health Sciences, 2021.
12. Surace SJ, Deitch J, Johnston RV, et al. Shock wave therapy for rotator cuff disease with or without calcification. *Cochrane Database of Systematic Reviews* 2020(3) doi: 10.1002/14651858.CD008962.pub2
13. Kim EK, Kwak KI. Effect of extracorporeal shock wave therapy on the shoulder joint functional status of patients with calcific tendinitis. *J Phys Ther Sci* 2016;28(9):2522-24. doi: 10.1589/jpts.28.2522 [published Online First: 2016/11/02]
14. Cacchio A, Paoloni M, Barile A, et al. Effectiveness of radial shock-wave therapy for calcific tendinitis of the shoulder: single-blind, randomized clinical study. *Phys Ther* 2006;86(5):672-82. [published Online First: 2006/05/03]
15. Bjordal JM, Lopes-Martins RAB, Joensen J, et al. The anti-inflammatory mechanism of low level laser therapy and its relevance for clinical use in physiotherapy. *Physical Therapy Reviews* 2010;15(4):286-93. doi: 10.1179/1743288X10Y.0000000001
16. Bjordal JM, Johnson MI, Iversen V, et al. Low-level laser therapy in acute pain: a systematic review of possible mechanisms of action and clinical effects in randomized placebo-controlled trials. *Photomed Laser Surg* 2006;24(2):158-68. doi: 10.1089/pho.2006.24.158 [published Online First: 2006/05/19]
17. Song HJ, Seo HJ, Lee Y, et al. Effectiveness of high-intensity laser therapy in the treatment of musculoskeletal disorders: A systematic review and meta-analysis of randomized controlled

1  
2  
3  
4  
5  
6  
7  
8  
9  
10  
11  
12  
13  
14  
15  
16  
17  
18  
19  
20  
21  
22  
23  
24  
25  
26  
27  
28  
29  
30  
31  
32  
33  
34  
35  
36  
37  
38  
39  
40  
41  
42  
43  
44  
45  
46  
47  
48  
49  
50  
51  
52  
53  
54  
55  
56  
57  
58  
59  
60

- trials. *Medicine (Baltimore)* 2018;97(51):e13126. doi: 10.1097/md.00000000000013126 [published Online First: 2018/12/24]
18. Paolucci T, Pezzi L, Centra AM, et al. Electromagnetic Field Therapy: A Rehabilitative Perspective in the Management of Musculoskeletal Pain - A Systematic Review. *J Pain Res* 2020;13:1385-400. doi: 10.2147/jpr.S231778 [published Online First: 2020/07/02]
19. Gordon GA. Designed electromagnetic pulsed therapy: clinical applications. *J Cell Physiol* 2007;212(3):579-82. doi: 10.1002/jcp.21025 [published Online First: 2007/06/20]
20. Smania N, Corato E, Fiaschi A, et al. Repetitive magnetic stimulation: a novel therapeutic approach for myofascial pain syndrome. *J Neurol* 2005;252(3):307-14. doi: 10.1007/s00415-005-0642-1 [published Online First: 2005/02/24]
21. Laufer Y, Dar G. Effectiveness of thermal and athermal short-wave diathermy for the management of knee osteoarthritis: a systematic review and meta-analysis. *Osteoarthritis Cartilage* 2012;20(9):957-66. doi: 10.1016/j.joca.2012.05.005 [published Online First: 2012/06/05]
22. Allen RJ. Physical agents used in the management of chronic pain by physical therapists. *Phys Med Rehabil Clin N Am* 2006;17(2):315-45. doi: 10.1016/j.pmr.2005.12.007 [published Online First: 2006/04/18]
23. Shields N, Gormley J, O'Hare N. Short-Wave Diathermy: A Review of Existing Clinical Trials. *Physical Therapy Reviews* 2001;6(2):101-18. doi: 10.1179/ptr.2001.6.2.101
24. Goats GC. Physiotherapy Treatment Modalities -Microwave diathermy. *Br. J. Sp. Med.* 2012; 24: 212–218.
25. Wang Y, Lu H, Li S, et al. Effect of cold and heat therapies on pain relief in patients with delayed onset muscle soreness: A network meta-analysis. *J Rehabil Med* 2022;54:jrm00258. doi: 10.2340/jrm.v53.331 [published Online First: 2021/10/13]
26. Petrofsky JS, Khowailed IA, Lee H, et al. Cold Vs. Heat After Exercise-Is There a Clear Winner for Muscle Soreness. *J Strength Cond Res* 2015;29(11):3245-52. doi: 10.1519/jsc.0000000000001127 [published Online First: 2015/10/27]
27. Guilhem G, Hug F, Couturier A, et al. Effects of air-pulsed cryotherapy on neuromuscular recovery subsequent to exercise-induced muscle damage. *Am J Sports Med* 2013;41(8):1942-51. doi: 10.1177/0363546513490648 [published Online First: 2013/06/07]
28. Watson T. Ultrasound in contemporary physiotherapy practice. *Ultrasonics* 2008;48(4):321-9. doi: 10.1016/j.ultras.2008.02.004 [published Online First: 2008/05/10]
29. O'Brien WD, Jr. Ultrasound-biophysics mechanisms. *Prog Biophys Mol Biol* 2007;93(1-3):212-55. doi: 10.1016/j.pbiomolbio.2006.07.010 [published Online First: 2006/08/29]

**CREDES Checklist:****Recommendations for the Conducting and REporting of DElphi Studies (CREDES)[1]****Technology in Palliative Care (TIP): the identification of digital priorities for palliative care research using a modified Delphi method**

| Items of reporting                                                                                                                                                                                                                                                                                                                                                                                                                                                                                                                                                                                                                                                                                                                                                                                                                                                                       | Reported on page           |
|------------------------------------------------------------------------------------------------------------------------------------------------------------------------------------------------------------------------------------------------------------------------------------------------------------------------------------------------------------------------------------------------------------------------------------------------------------------------------------------------------------------------------------------------------------------------------------------------------------------------------------------------------------------------------------------------------------------------------------------------------------------------------------------------------------------------------------------------------------------------------------------|----------------------------|
| <i>Purpose and rationale.</i> The purpose of the study should be clearly defined and demonstrate the appropriateness of the use of the Delphi technique as a method to achieve the research aim. A rationale for the choice of the Delphi technique as the most suitable method needs to be provided.                                                                                                                                                                                                                                                                                                                                                                                                                                                                                                                                                                                    | 5 - 6                      |
| <i>Expert panel.</i> Criteria for the selection of experts and transparent information on recruitment of the expert panel, sociodemographic details including information on expertise regarding the topic in question, (non)response and response rates over the ongoing iterations should be reported.                                                                                                                                                                                                                                                                                                                                                                                                                                                                                                                                                                                 | 7                          |
| <i>Description of the methods.</i> The methods employed need to be comprehensible; this includes information on preparatory steps (How was available evidence on the topic in question synthesised?), piloting of material and survey instruments, design of the survey instrument(s), the number and design of survey rounds, methods of data analysis, processing and synthesis of experts' responses to inform the subsequent survey round and methodological decisions taken by the research team throughout the process.                                                                                                                                                                                                                                                                                                                                                            | 7-10                       |
| <i>Procedure.</i> Flow chart to illustrate the stages of the Delphi process, including a preparatory phase, the actual 'Delphi rounds', interim steps of data processing and analysis, and concluding steps.                                                                                                                                                                                                                                                                                                                                                                                                                                                                                                                                                                                                                                                                             | 6-9; Figure 1-2            |
| <i>Definition and attainment of consensus.</i> It needs to be comprehensible to the reader how consensus was achieved throughout the process, including strategies to deal with non-consensus.                                                                                                                                                                                                                                                                                                                                                                                                                                                                                                                                                                                                                                                                                           | 9-10                       |
| <i>Results.</i> Reporting of results for each round separately is highly advisable in order to make the evolving of consensus over the rounds transparent. This includes figures showing the average group response, changes between rounds, as well as any modifications of the survey instrument such as deletion, addition or modification of survey items based on previous rounds.                                                                                                                                                                                                                                                                                                                                                                                                                                                                                                  | 11-12; Table 2; Appendix 2 |
| <i>Discussion of limitations.</i> Reporting should include a critical reflection of potential limitations and their impact of the resulting guidance.                                                                                                                                                                                                                                                                                                                                                                                                                                                                                                                                                                                                                                                                                                                                    | 15-16                      |
| <i>Adequacy of conclusions.</i> The conclusions should adequately reflect the outcomes of the Delphi study with a view to the scope and applicability of the resulting practice guidance.                                                                                                                                                                                                                                                                                                                                                                                                                                                                                                                                                                                                                                                                                                | 16                         |
| <i>Publication and dissemination.</i> The resulting guidance on good practice in palliative care should be clearly identifiable from the publication, including recommendations for transfer into practice and implementation. If the publication does not allow for a detailed presentation of either the resulting practice guidance or the methodological features of the applied Delphi technique, or both, reference to a more detailed presentation elsewhere should be made (e.g. availability of the full guideline from the authors or online; publication of a separate paper reporting on methodological details and particularities of the process (e.g. persistent disagreement and controversy on certain issues)). A dissemination plan should include endorsement of the guidance by professional associations and health care authorities to facilitate implementation. | 13-14                      |

- Jünger S, Payne SA, Brine J, Radbruch L, Brearley SG. Guidance on Conducting and REporting DElphi Studies (CREDES) in palliative care: Recommendations based on a methodological systematic review. *Palliat Med.* 2017;31: 684–706. doi:10.1177/0269216317690685



# BMJ Open

## Evidence-informed and consensus-based statements about SAFETY of Physical Agent Modalities Practice in physiotherapy and rehabilitation medicine (SAFE PAMP): a national Delphi of healthcare scientific societies

|                                 |                                                                                                                                                                                                                                                                                                                                                                                                                                                                                                                                                                                                                                                                                                                                                                                                                                                                                                                                                                                                                                                                                                                                                            |
|---------------------------------|------------------------------------------------------------------------------------------------------------------------------------------------------------------------------------------------------------------------------------------------------------------------------------------------------------------------------------------------------------------------------------------------------------------------------------------------------------------------------------------------------------------------------------------------------------------------------------------------------------------------------------------------------------------------------------------------------------------------------------------------------------------------------------------------------------------------------------------------------------------------------------------------------------------------------------------------------------------------------------------------------------------------------------------------------------------------------------------------------------------------------------------------------------|
| Journal:                        | <i>BMJ Open</i>                                                                                                                                                                                                                                                                                                                                                                                                                                                                                                                                                                                                                                                                                                                                                                                                                                                                                                                                                                                                                                                                                                                                            |
| Manuscript ID                   | bmjopen-2023-075348.R2                                                                                                                                                                                                                                                                                                                                                                                                                                                                                                                                                                                                                                                                                                                                                                                                                                                                                                                                                                                                                                                                                                                                     |
| Article Type:                   | Original research                                                                                                                                                                                                                                                                                                                                                                                                                                                                                                                                                                                                                                                                                                                                                                                                                                                                                                                                                                                                                                                                                                                                          |
| Date Submitted by the Author:   | 29-Jan-2024                                                                                                                                                                                                                                                                                                                                                                                                                                                                                                                                                                                                                                                                                                                                                                                                                                                                                                                                                                                                                                                                                                                                                |
| Complete List of Authors:       | Gianola, Silvia; IRCCS Galeazzi Orthopaedic Institute, Unit of Clinical Epidemiology<br>Bargeri, Silvia; IRCCS Galeazzi Orthopaedic Institute, Unit of Clinical Epidemiology<br>Pellicciari, Leonardo; IRCCS Istituto Delle Scienze Neurologiche di Bologna<br>Gambazza, Simone; Fondazione IRCCS Ca' Granda Ospedale Maggiore Policlinico<br>Rossettini, Giacomo; Università degli Studi di Verona, School of Physiotherapy; University of Rome La Sapienza, Department of Human Neurosciences<br>Fulvio, Anna; Associazione Italiana di Fisioterapia<br>Genovese, Vincenzo; Associazione Italiana di Fisioterapia<br>Benedini, Matteo; Associazione Italiana di Fisioterapia<br>Proverbio, Emanuele; Associazione Italiana di Fisioterapia<br>Cecchetto, Simone; Associazione Italiana di Fisioterapia; Provincia autonoma di Trento Azienda Provinciale per i Servizi Sanitari<br>Castellini, Greta; IRCCS Istituto Ortopedico Galeazzi, Clinical Epidemiology Unit<br>Turolla, Andrea; Alma Mater Studiorum University of Bologna; IRCCS Policlinico Sant'Orsola-Malpighi<br>SAFE PAMP Collaborators, SAFE PAMP Collaborators; SAFE PAMP Collaborators |
| <b>Primary Subject Heading</b>: | Rehabilitation medicine                                                                                                                                                                                                                                                                                                                                                                                                                                                                                                                                                                                                                                                                                                                                                                                                                                                                                                                                                                                                                                                                                                                                    |
| Secondary Subject Heading:      | Rehabilitation medicine, Rheumatology, Sports and exercise medicine, Neurology, Urology                                                                                                                                                                                                                                                                                                                                                                                                                                                                                                                                                                                                                                                                                                                                                                                                                                                                                                                                                                                                                                                                    |
| Keywords:                       | Physical Therapy Modalities, REHABILITATION MEDICINE, Health & safety < HEALTH SERVICES ADMINISTRATION & MANAGEMENT, Musculoskeletal disorders < ORTHOPAEDIC & TRAUMA SURGERY, ORTHOPAEDIC & TRAUMA SURGERY, NEUROLOGY                                                                                                                                                                                                                                                                                                                                                                                                                                                                                                                                                                                                                                                                                                                                                                                                                                                                                                                                     |
|                                 |                                                                                                                                                                                                                                                                                                                                                                                                                                                                                                                                                                                                                                                                                                                                                                                                                                                                                                                                                                                                                                                                                                                                                            |

1  
2  
3  
4  
5  
6  
7  
8  
9  
10  
11  
12  
13  
14  
15  
16  
17  
18  
19  
20  
21  
22  
23  
24  
25  
26  
27  
28  
29  
30  
31  
32  
33  
34  
35  
36  
37  
38  
39  
40  
41  
42  
43  
44  
45  
46  
47  
48  
49  
50  
51  
52  
53  
54  
55  
56  
57  
58  
59  
60







I, the Submitting Author has the right to grant and does grant on behalf of all authors of the Work (as defined in the below author licence), an exclusive licence and/or a non-exclusive licence for contributions from authors who are: i) UK Crown employees; ii) where BMJ has agreed a CC-BY licence shall apply, and/or iii) in accordance with the terms applicable for US Federal Government officers or employees acting as part of their official duties; on a worldwide, perpetual, irrevocable, royalty-free basis to BMJ Publishing Group Ltd ("BMJ") its licensees and where the relevant Journal is co-owned by BMJ to the co-owners of the Journal, to publish the Work in this journal and any other BMJ products and to exploit all rights, as set out in our [licence](#).

The Submitting Author accepts and understands that any supply made under these terms is made by BMJ to the Submitting Author unless you are acting as an employee on behalf of your employer or a postgraduate student of an affiliated institution which is paying any applicable article publishing charge ("APC") for Open Access articles. Where the Submitting Author wishes to make the Work available on an Open Access basis (and intends to pay the relevant APC), the terms of reuse of such Open Access shall be governed by a Creative Commons licence – details of these licences and which [Creative Commons](#) licence will apply to this Work are set out in our licence referred to above.

Other than as permitted in any relevant BMJ Author's Self Archiving Policies, I confirm this Work has not been accepted for publication elsewhere, is not being considered for publication elsewhere and does not duplicate material already published. I confirm all authors consent to publication of this Work and authorise the granting of this licence.

1  
2  
3 1 **Evidence-informed and consensus-based statements about SAFETY of Physical**  
4  
5  
6 2 **Agent Modalities Practice in physiotherapy and rehabilitation medicine (SAFE**  
7  
8 3 **PAMP): a national Delphi of healthcare scientific societies**  
9  
10

11 4  
12  
13 5 ***Authors List***  
14

15 6 *Silvia Gianola<sup>1</sup>, Silvia Bargerì<sup>1</sup>, Leonardo Pellicciari<sup>2</sup>, Simone Gambazza<sup>3</sup>, Giacomo Rossetti<sup>4,5,6</sup>, Anna*  
16  
17 7 *Fulvio<sup>7</sup>, Vincenzo Genovese<sup>7</sup>, Matteo Benedini<sup>7</sup>, Emanuele Proverbio<sup>7</sup>, Simone Cecchetto<sup>7,8</sup>, Greta*  
18  
19 8 *Castellini<sup>1\*</sup>, Andrea Turolla<sup>9,10</sup> and SAFE PAMP Collaborators*  
20  
21

- 22 9  
23  
24  
25 10 1. IRCCS Istituto Ortopedico Galeazzi, Unit of Clinical Epidemiology, Milan, Italy  
26  
27 11 2. IRCCS Istituto delle Scienze Neurologiche di Bologna, Bologna, Italy  
28  
29 12 3. Healthcare Professions Department, Fondazione IRCCS Ca' Granda Ospedale Maggiore Policlinico,  
30  
31 13 Milan, Italy  
32  
33 14 4. School of Physiotherapy, University of Verona, Verona, Italy  
34  
35 15 5. Department of Human Neurosciences, University of Roma "Sapienza Roma", Rome, Italy  
36  
37 16 6. Department of Physiotherapy, Faculty of Sport Sciences, Universidad Europea de Madrid, Calle  
38  
39 17 Tajo s/n, Villaviciosa de Odón 28670, Spain  
40  
41 18 7. Associazione Italiana di Fisioterapia (AIFI), Rome, Italy  
42  
43 19 8. Direction of Health Professions, APSS, 38014 Trento, Italy.  
44  
45 20 9. Department of Biomedical and Neuromotor Sciences-DIBINEM, Alma Mater Studiorum Università  
46  
47 21 di Bologna, 40138 Bologna, Italy.  
48  
49 22 10. Unit of Occupational Medicine, IRCCS Azienda Ospedaliero-Universitaria di Bologna, Bologna, Italy  
50  
51  
52

53 23 Corresponding author:

54 24 Silvia Bargerì

55 25 IRCCS Istituto Ortopedico Galeazzi, Unit of Clinical Epidemiology, Milan, Italy

56 26 [silvia.bargerì@grupposandonato.it](mailto:silvia.bargerì@grupposandonato.it)  
57  
58  
59  
60

1  
2  
3 27 \*co-last  
4  
5

6 28 **SAFE PAMP Collaborators**  
7

8 29 *Chiara Torresetti, on behalf of AIUG (Associazione Italiana di Urologia Ginecologia e del Pavimento Pelvico)*  
9

10 30 *Bianca Masturzo, on behalf of AOGOI (Associazione Ostetrici Ginecologi Ospedalieri Italiani)*  
11

12 31 *Carla Berliri, on behalf of Cittadinanzattiva Associazione di Promozione Socialez*  
13

14 32 *Mauro Roselli, on behalf of OTODI (Ortopedici e Traumatologi Ospedalieri D'Italia)*  
15

16 33 *Stefano Vercelli, on behalf of FIASF (Federazione Italiana delle Associazioni Scientifiche di Fisioterapia)*  
17

18 34 *Marco Scorcu, on behalf of FMSI (Federazione Medico Sportiva Italiana)*  
19

20 35 *Giuseppe Botta, on behalf of SIFL (Società Italiana di Flebologia)*  
21

22 36 *Luigi Nappi, on behalf of SIGO (Società Italiana Di Ginecologia E Ostetricia)*  
23

24 37 *Gianmarco Rea, on behalf of SIMG (Società Italiana di Medicina Generale e delle cure primarie)*  
25

26 38 *Enrico Marinelli, on behalf of SIMLA (Società Italiana di Medicina Legale e delle Assicurazioni)*  
27

28 39 *Fabio Bandini, on behalf of SIN (Società Italiana di Neurologia)*  
29

30 40 *Roberto Bortolotti, on behalf of SIR (Società Italiana di Reumatologia)*  
31

32 41 *Viviana Rosati, on behalf of SIRN (Società Italiana di Riabilitazione Neurologica)*  
33

34 42 *Armando Perrotta, on behalf of SISC (Società Italiana per lo Studio delle Cefalee)*  
35

36 43 *Gianfranco Lamberti, on behalf of SIUD (Società Italiana di Urodinamica)*  
37

38 44 *Monica Pierattelli, on behalf of SICuPP (Società Italiana Delle Cure Primarie Pediatriche)*  
39

40 45 *Giancarlo Tancredi, on behalf of SIP (Società Italiana di Pediatria).*  
41  
42  
43  
44  
45  
46  
47  
48  
49  
50  
51  
52  
53  
54  
55  
56  
57  
58  
59  
60

1  
2  
3 46 **ABSTRACT: 280 words**

4  
5 47 **Objective:** A shared consensus on safety about Physical Agent Modalities (PAMs) practice in  
6  
7  
8 48 physiotherapy and rehabilitation is lacking. We aimed to develop evidence-informed and consensus-  
9  
10 49 based statements about the safety of PAMs.

11  
12 50 **Study design and setting:** A RAND-modified Delphi rounds' survey was used to reach a consensus.  
13  
14 51 We established a steering committee of the Italian Association of Physiotherapy (Associazione  
15 52 Italiana di Fisioterapia - AIFI) to identify areas and questions for developing statements about the  
16  
17 52 safety of the most commonly used PAMs in physiotherapy and rehabilitation. We invited 28 National  
18  
19 53 Scientific and Technical Societies, including forensics and lay members, as a multidisciplinary and  
20  
21 54 multi-professional panel of experts to evaluate the nine proposed statements and formulate additional  
22  
23 55 inputs. The level of agreement was measured with a 9-point Likert scale. Consensus in the Delphi  
24  
25 56 rounds was assessed using the rating proportion with a threshold of 75%.  
26  
27  
28 57

29  
30 58 **Results:** Seventeen (61%) out of 28 Scientific and Technical Societies participated, involving their  
31  
32 59 most representative members. Experts composing the panel were mainly clinicians (88%) reporting  
33  
34 60 multiple expertise in musculoskeletal (47%), pelvic floor (24%), neurological (18%) and lymphatic  
35  
36 61 (6%) disorders with a median experience of 30 years (IQR=17-36). Two Delphi rounds were  
37  
38 62 necessary to reach a consensus. The final approved criteria list comprised nine statements about the  
39  
40 63 safety in adult patients on nine PAMs (i.e., electrical stimulation neuromodulation, extracorporeal  
41  
42 64 shock wave therapy, laser therapy, electromagnetic therapy, diathermy, hot thermal agents,  
43  
44 65 cryotherapy and therapeutic ultrasound) with a general note about populations subgroups.  
45  
46  
47 66

48  
49 66 **Conclusions:** The resulting consensus-based statements inform patients, healthcare professionals and  
50  
51 67 policy-makers regarding the safe application of PAMs in physiotherapy and rehabilitation practice.  
52  
53 68 Future research is needed to extend this consensus on pediatric and frail patients such as  
54  
55 69 immunocompromised patients.  
56  
57  
58  
59  
60

1  
2  
3 70 **Key Words:** Physical Therapy Modalities, Safety, Rehabilitation, Physical and Rehabilitation  
4  
5 71 Medicine, Delphi Technique, Orthopedics, Neurology, Pelvic Floor, Musculoskeletal System  
6  
7  
8

9 72 **STRENGTH AND LIMITATIONS**  
10  
11

- 12 73 • Starting from a recent scoping review of the literature, we aimed to acknowledge evidence-  
13 informed indications of rehabilitation for safe PAMs;  
14 74  
15 75 • Indications on the safety of physical agents (PAMs) were developed by a steering committee  
16 for different target conditions in physiotherapy and rehabilitation practice and supported by  
17 76 evidence and clinical expertise  
18 77  
19 78 • We strictly followed published guidelines for reporting and conduction, with a-priori publicly  
20 79 registered protocol to determine agreement within the Delphi process.  
21 80  
22 81 • The multi-professional and multidisciplinary panel of experts rated and revised the agreement  
23 of indications for safe PAMs rehabilitation in multiple rounds until reaching a consensus.  
24 82  
25 83 • Indications did not cover the clinical effectiveness of PAMs as well as specific subgroups for  
26 which evidence and expertise were not available.  
27  
28  
29  
30  
31  
32  
33  
34  
35  
36  
37  
38  
39  
40  
41  
42  
43  
44  
45  
46  
47  
48  
49  
50  
51  
52  
53  
54  
55  
56  
57  
58  
59  
60

1  
2  
3  
4  
5  
6  
7  
8  
9  
10  
11  
12  
13  
14  
15  
16  
17  
18  
19  
20  
21  
22  
23  
24  
25  
26  
27  
28  
29  
30  
31  
32  
33  
34  
35  
36  
37  
38  
39  
40  
41  
42  
43  
44  
45  
46  
47  
48  
49  
50  
51  
52  
53  
54  
55  
56  
57  
58  
59  
60

## 84 INTRODUCTION

85  
86 Physical agent modalities (PAMs) are extensively applied in physiotherapy and rehabilitation practice  
87 to elicit therapeutic effects on tissues, including reducing swelling, alleviating pain, expediting the  
88 healing process, and improving muscle tone.(1-4) Healthcare professionals from diverse medical  
89 specialties can recommend and administer these treatments alongside other physiotherapy and  
90 rehabilitation interventions. However, clinicians and patients must be informed about the safety of  
91 the proposed treatments. Previous consensus regarding contraindications and precautions associated  
92 with using PAMs from various organizations were released in the early 2000s.(5-7) Still, they have  
93 become outdated in light of technological advancements of the last years.(8, 9) A recent scoping  
94 review of the literature(10) examined several systematic reviews on the safety of commonly used  
95 PAMs (i.e., cryotherapy, electrical stimulation, transcutaneous electrical nerve stimulation, functional  
96 electrical stimulation, extracorporeal shockwave therapy, laser therapy, magnetotherapy, pulsed  
97 electromagnetic field and diathermy), revealing no important harm associated with their use.  
98 Nevertheless, it is worth noting that adverse events may be underreported in primary studies(11, 12)  
99 highlighting the need to integrate expert experience to bridge the current gaps between existing  
100 literature and clinical practice. Therefore, the purpose of the SAFETY of Physical Agent Modalities  
101 Practice (SAFE PAMP) consensus in physiotherapy and rehabilitation is to develop evidence-  
102 informed and expert consensus-based statements about the safety of PAMs through a RAND Delphi  
103 procedure. Our goal is to make patients, healthcare professionals and policy-makers aware about the  
104 safe application of PAMs in physiotherapy and rehabilitation.

## 105 METHODS

### 106 Design

107 A RAND-modified Delphi rounds survey process was employed as the facilitation technique for  
108 reaching expert consensus.(13, 14) Delphi technique is primarily used when the available knowledge  
109 is incomplete or subject to uncertainty.(15) We followed the guidance on "Conducting and REporting  
110 of DELphi Studies" (CREDES).(16, 17) This project is exempted from ethical approval according to  
111 the "ethics and data protection" regulations of the European Commission.(18) More details are  
112 reported in **Supplementary File 1**. The protocol was *a-priori* registered on the Open Science  
113 Framework (OSF) online repository.(19)

114 The process consisted of four phases: (i) establishment of the steering committee and invitation of  
115 national scientific and technical societies to constitute the panel of experts; (ii) generation of  
116 statements using a comprehensive approach based on a published scoping review of existing  
117 systematic reviews on PAMs safety in physiotherapy and rehabilitation medicine(10) as well as on  
118 expertise from content experts of the steering committee; (iii) rating of statements from the panel of  
119 experts through a national Delphi survey aiming to identify, assess and modify statements importance  
120 for each field (e.g., musculoskeletal); (iv) an online workshop meeting to finalize the list of statements  
121 reaching the final consensus. Finally, we planned to disseminate the final statements list as good  
122 clinical practice (**Figure 1**).

[Figure 1]

### 126 **Phase I. Establishment of the steering committee and panel of experts**

#### 127 *Steering committee*

128 In June 2022, the project team nominated a steering committee responsible for defining the list of  
129 statements of safe PAMs, selecting national scientific and technical societies for expert participants,  
130 developing the Delphi questionnaires, and analyzing responses from participants after each round.

1  
2  
3 131 The steering committee involved 11 content experts from the Italian Association of Physiotherapy  
4  
5 132 (Associazione Italiana di Fisioterapia – AIFI), a member of the World Physiotherapy (20). AIFI is  
6  
7  
8 133 the scientific and technical societies in Italy for the physiotherapy profession recognized by the Italian  
9  
10 134 Minister of Health to produce clinical practice guidelines in the field.(21, 22)

11  
12 135 To assure the external validity of the consensus process, the steering committee included two content  
13  
14  
15 136 experts on PAMs (MB, EP), three on rehabilitation of musculoskeletal disorders (GR, VG, SB), one  
16  
17 137 on neurological physiotherapy and neuroscience (AT), one on pelvic floor rehabilitation (AF), and  
18  
19 138 four methodologists (SGa, SGi, GC, LP).

20  
21  
22 139

#### 23 24 140 *Panel of experts*

25  
26 141 It is known that the diversity of a Delphi panel has an impact on the quality of the final  
27  
28  
29 142 recommendations. In contrast, no agreement on the panel size for Delphi studies exists. Panels of 20–  
30  
31 143 30 participants are common.(23, 24) Thus, the steering committee invited all the national  
32  
33 144 multidisciplinary and multi-professional scientific and technical societies involved in physiotherapy  
34  
35 145 and rehabilitation care (n=26) and the societies dealing with forensics (n=1). These societies were  
36  
37  
38 146 identified from the published endorsed by the Italian Ministry of Health and are recognized as the  
39  
40 147 ones entitled to generate national clinical practice guidelines.(21, 22) Each society delegated their  
41  
42 148 most representative member involved in physiotherapy and rehabilitation care to join the panel of  
43  
44  
45 149 experts. The panel of expert members was multidisciplinary and multi-professional, including  
46  
47 150 clinicians, researchers, and healthcare managers from different fields(24) (e.g., orthopedics,  
48  
49 151 neurology). To represent patients' perspectives, the panel also included a lay member from  
50  
51  
52 152 Cittadinazattiva,(25) the largest Italian patient advocate organization that promotes citizen activism  
53  
54 153 for the protection of rights, the care of common goods, and support for people in conditions of  
55  
56 154 weakness.

57  
58 155

#### 59 60 156 ***Phase II. Generation of statements***



1  
2  
3 157 Firstly, the steering committee formulated statements aimed at safety based on evidence and clinical  
4  
5 158 expertise. Particularly, evidence was summarized from a published scoping review and its  
6  
7  
8 159 supplementary materials,(10) which gathered information about the safety of the nine PAMs from  
9  
10 160 117 systematic reviews in physiotherapy and rehabilitation medicine (e.g. safety of PAMs for low  
11  
12 161 back pain, osteoarthritis, stroke, urinary incontinence). Clinical expertise was assured by content  
13  
14  
15 162 experts of AIFI (e.g., musculoskeletal disorders, orthopedic and neurological physiotherapy and  
16  
17 163 pelvic floor rehabilitation) adding examples of clinical conditions for which they commonly safely  
18  
19 164 apply PAMs in their specific field. Disagreements between experts were resolved through discussion.  
20  
21  
22 165 The steering committee formulated statements for each PAM (with distinction of evidence and  
23  
24 166 expertise) ensuring that all the potentially relevant topics in the field would be included in the initial  
25  
26 167 list of questions for the first Delphi round (**Supplementary File 2** reported details about each included  
27  
28 168 PAM). Each statement included a statement regarding safety about the following PAMs:

- 30 169 1. Electrical stimulation
- 31  
32  
33 170 2. Neuromodulation, antalgic and interferential electrical currents
- 34  
35 171 3. Extracorporeal shock wave therapy
- 36  
37  
38 172 4. Laser therapy
- 39  
40 173 5. Electromagnetic therapy
- 41  
42 174 6. Diathermy
- 43  
44 175 7. Hot thermal agents
- 45  
46  
47 176 8. Cryotherapy
- 48  
49 177 9. Therapeutic ultrasound
- 50

51 178 Statements were developed for different target conditions. PAMs are delivered by expert healthcare  
52  
53  
54 179 professionals (who had undergone formal education and training) to ensure patient safety in inpatient  
55  
56 180 and outpatient settings. Statements were presented within the relevant rehabilitation field, along with  
57  
58 181 a list of patient conditions in which the PAMs were indicated as safe and supported by evidence and  
59  
60 182 clinical expertise.

1  
2  
3  
4  
5  
6  
7  
8  
9  
10  
11  
12  
13  
14  
15  
16  
17  
18  
19  
20  
21  
22  
23  
24  
25  
26  
27  
28  
29  
30  
31  
32  
33  
34  
35  
36  
37  
38  
39  
40  
41  
42  
43  
44  
45  
46  
47  
48  
49  
50  
51  
52  
53  
54  
55  
56  
57  
58  
59  
60183  
184  
185  
186  
187  
188  
189  
190  
191  
192  
193  
194  
195  
196  
197  
198  
199  
200  
201  
202  
203  
204  
205  
206  
207  
208

### ***Phase III. Rating of statements through Delphi Rounds***

We used an electronic Delphi process, allowing participants to submit responses anonymously and independently without being biased by other participants' identities and responses. The steering committee reached the panel of experts using the SurveyMonkey online platform (Palo Alto, CA, USA; [www.surveymonkey.com](http://www.surveymonkey.com)) and used a blinded electronic rating.

The web-based survey consisted of two sections: the first regarded the participants' demographics (e.g., type of profession, the field of expertise, and years of experience), and the second the rating for statements. The panel of experts evaluated the proposed statements and formulated additional comments using a free text box to ensure complete topic coverage. According to the RAND method, the panel of experts used a 9-point Likert scale (i.e., 1-3 = highly inappropriate, 4-6 = undecided, 7-9 = highly appropriate) for rating the level of concordance for each statement.

In addition, the experts could abstain from rating, selecting the answer "Not my expertise" for statements they were not familiar with.

A summary of results for each Delphi round was provided according to the total number of experts rating as feedback to inform panel members on consensus development with feedback and descriptive statistics incorporated for the next round. The panel of experts were asked to re-rate their evaluation in more rounds only for those statements needing clarification or for statements for which consensus (i.e.,  $\geq 75\%$  on a 7-9 points scale or 1-3 points scale) was not reached.

An anonymous report of each round was provided to each expert, showing the distribution of responses for each statement with all additional comments provided in the free text box. Based on previous rating, statements were modified and presented for the next round. Up to three reminder emails for completion were sent to each component individually. Data collection occurred over 5 months (June-November 2022).

### ***Phase IV. Workshop Meeting as last round***

1  
2  
3 209 After reaching a consensus, the steering committee joined an online meeting to refine statements  
4  
5 210 according to each expert contribution and to confirm which statements would be included in the final  
6  
7  
8 211 criteria list. Finally, the panel of experts was asked to rate on the final statements list for the closing  
9  
10 212 audit procedure.

11  
12 213

### 13 14 15 214 **Definition and calculation of consensus**

16  
17 215 In agreement with the RAND appropriateness method, we adopted predefined criteria(26) to assess  
18  
19 216 the consensus in the Delphi method using the proportion of ratings with a threshold of 75%.(27)

20  
21  
22 217 Particularly:

23  
24 218

25  
26 219 1. Consensus in:  $\geq 75\%$  of participants scored the item as "highly appropriate" (score 7 to 9),  
27  
28 220 and  $< 15\%$  scored the item as of "highly inappropriate" (score 1 to 3)

29  
30 221 2. Consensus out:  $\geq 75\%$  of participants scored the item as of "highly inappropriate" (score  
31  
32 222 1 to 3), and  $< 15\%$  scored the item as "highly appropriate" (score 7 to 9)

33  
34  
35 223 3. No consensus: All other results.  
36

37  
38 224

### 39 40 225 **Statistical Analysis**

41  
42 226 Descriptive statistics were used to describe general characteristic of participants, summarised as  
43  
44 227 median and interquartile range (IQR) and counts and percentage (%), as appropriate. Each statement  
45  
46  
47 228 was analysed quantitatively by the percentage of agreement ratings.

48  
49 229

### 50 51 230 **Role of the Funding Source**

52  
53 231 AIFI supported this research. The funder played no role in this study's design, conduct, or reporting.  
54  
55

56 232

### 57 58 233 **Patient and public involvement**

59  
60 234 In this study, a patient representative participated in the panel of experts to rate the statements.

1  
2  
3  
4  
5  
6  
7  
8  
9  
10  
11  
12  
13  
14  
15  
16  
17  
18  
19  
20  
21  
22  
23  
24  
25  
26  
27  
28  
29  
30  
31  
32  
33  
34  
35  
36  
37  
38  
39  
40  
41  
42  
43  
44  
45  
46  
47  
48  
49  
50  
51  
52  
53  
54  
55  
56  
57  
58  
59  
60

## 235 RESULTS

### 236 Participants

237 Out of the 28 scientific and technical societies/organizations that were invited as panel of experts,  
238 two declined their interest in participation, while nine did not provide a response. Finally, 17  
239 societies/organizations (invitation rate: 61%), each represented by their most representative expert  
240 member, were included (**Figure 2**). The majority of experts were clinicians (88.2%), with half having  
241 expertise in musculoskeletal disorders (47.1%). Others were specialized in areas such as pelvic floor  
242 (23.5%), neurological (17.6%), lymphatic disorders (5.9%), pediatrics (5.9%). The panel also  
243 included a forensic and a lay member as patient representative. On average, experts had a median of  
244 30 years of experience (IQR 17-36) in their respective fields. All general characteristics are reported  
245 in **Table 1**. No conflict of interest was present (**Supplementary File 3**).

[Figure 2]

[Table 1]

### 250 Delphi rounds

251 Two rounds of Delphi were necessary to reach a consensus.

#### 253 Round 1

254 Overall, 17 experts panel participants completed the survey (participation rate: 100%). All statements  
255 passed the first round with a consensus of 75% (**Table 2**). Five experts offered justifications for their  
256 choices (e.g., examples of clinical practice) and gave important inputs for the statements. In particular,  
257 most of them raised concerns about the safe use of PAMs in children. Additionally, they suggested  
258 refining the purpose of the statements, emphasizing that the focus was on patient safety rather than  
259 provider safety. Some experts reported uncertainties about safe use of PAMs according to their  
260 experiences. For examples, one expert reported the possible mild skin irritation in the hot thermal

1  
2  
3 261 therapies and another one suggested caution in the use of cryotherapy due to risk of cold burns,  
4  
5 262 especially if the patients are not well informed or supervised. Then, one expert was uncertain about  
6  
7  
8 263 safety in persistent use of electromagnetic therapies for long-terms. Some experts suggested safe use  
9  
10 264 of PAMS in other fields of applications such as the use of diathermia in the dermatological field for  
11  
12 265 Lichen Sclerosus, that was out of our purposes. All comments were considered in the release of the  
13  
14  
15 266 statements (**Supplementary File 4**).

16  
17 267 [Table 2]  
18

19 268  
20  
21 269 *Round 2*

22  
23 270 Statements of Round 1 were reviewed according to panel comments for the subsequent assessment  
24  
25  
26 271 in Round 2, with a specific restriction on the adult population and a clearer emphasis on patient safety.

- 27  
28 272 1. Overall, 14 experts panel participants (participation rate: 82%) completed the survey of Round  
29  
30 273 2, and all the statements passed with a consensus out of 75%. (**Table 2**). One expert provided  
31  
32 274 additional comments that included examples of expertise, which were subsequently integrated  
33  
34  
35 275 into the final list of statements. In particular, low level laser therapy could accentuate genital  
36  
37 276 dryness, requiring additional interventions to improve hydration during the treatment period  
38  
39 277 to mitigate certain discomfort to the patients. For other therapies, such as electrical  
40  
41  
42 278 stimulation and extracorporeal shock wave therapy there was uncertainty of applications in  
43  
44 279 some field due to little expertise (Supplementary File 4).  
45

46 280  
47  
48  
49  
50 281 *Workshop Meeting*

51  
52  
53 282 On September 27, 2022, nine experts panel participants (completion rate: 53%) joined the online  
54  
55 283 meeting to discuss comments, justifications and highlights. A comprehensive digital presentation of  
56  
57 284 Round 1 and Round 2 findings were reported during the workshop. Here, the panel of experts  
58  
59  
60 285 suggested introducing a general note making explicit that statements on safety were not extended to

1  
2  
3  
4  
5  
6  
7  
8  
9  
10  
11  
12  
13  
14  
15  
16  
17  
18  
19  
20  
21  
22  
23  
24  
25  
26  
27  
28  
29  
30  
31  
32  
33  
34  
35  
36  
37  
38  
39  
40  
41  
42  
43  
44  
45  
46  
47  
48  
49  
50  
51  
52  
53  
54  
55  
56  
57  
58  
59  
60

286 different subgroups of the population (e.g., children, adolescents, immunocompromised) due to lack  
287 of literature.

288 The final list of statements with this general note was shared via SurveyMonkey to reach final  
289 approval. All 17 experts panel participants (approval rate: 100%) approved and released the final  
290 statements list. One expert rated for the option "Not my expertise" in the statement of the cryotherapy  
291 (**Table 2**). In **Appendix 1**, we reported the final criteria list released for good clinical practice with  
292 details of sources (evidence and expertise) and applications in different fields and clinical conditions.

For peer review only

## 293 **DISCUSSION**

### 294 **Main findings**

295 The SAFE PAMP consensus developed safety statements for Physical Agent Modalities in physical  
296 therapy and rehabilitation practice. The multidisciplinary and multiprofessional panel of experts  
297 participated with a moderate response rate (61%).(28) All nine statements were approved in two  
298 rounds (consensus of over 75% agreement.) and released in a final workshop meeting with some  
299 adjustments made (e.g., specific population subgroups). In summary, experts agreed on the safety of  
300 PAMs in the adult population (>18 years) when prescribed and applied by a healthcare professional  
301 (e.g., physiotherapist, physician) who is formed and informed, as required by education and licensure.

### 303 **Literature Context**

304 Earlier consensus documents from different organizations were published in 2001,(5) 2006,(6) and  
305 2010.(7) In 2018, the American Occupational Therapy Association issued a position paper(29)  
306 clarifying the appropriate use of PAMs in contemporary occupation-based occupational therapy  
307 practice, providing clinical case vignettes in their field. Others reported indications and  
308 contraindications about specific types of PAMs (e.g., extracorporeal shock wave therapy(30)). Many  
309 other societies, such as National Institute for Clinical Excellence (NICE), also offer specific clinical  
310 questions guidelines, and we cannot exclude that they can involve recommendations on PAMs (e.g.,  
311 NG59 for low back pain(31)).

312 Overall, the Canadian document(7) represents the most comprehensive guidance on this topic.  
313 However, our Delphi is the most recent consensus on PAMs focusing on statements about safe PAMs  
314 application as clinical practice indications (e.g. field) sustained by literature and clinical expertise.  
315 This does not mean that the contraindications and precautions mentioned in the Canadian guideline(7)  
316 are in contrast to our findings. Simply, we use a complementary perspective. Our Delphi agree to  
317 define the common safe applications stratifying by fields/conditions whereas the Canadian one  
318 describes the contraindications and precautions about these common applications in particular

1  
2  
3 319 situations or under certain circumstances. For instance, both documents recognize cryotherapy and  
4  
5 320 electrical stimulation as commonly safe PAMs in musculoskeletal applications, such as treating ankle  
6  
7  
8 321 sprains and osteoarthritis. However, the Canadian guideline recommends precaution when combining  
9  
10 322 compression with cryotherapy to ensure the preservation of circulation and nerves. Furthermore, the  
11  
12 323 guideline contraindicated the use of electrical stimulation in presence of implanted electronic devices.  
13  
14  
15 324 Although the evidence presented in the Canadian guideline was not systematically collected (Canada  
16  
17 325 and the United States experts in conjunction with multiple sources such as textbooks), it is reasonable  
18  
19 326 to assume that many precautions and contraindications still remain applicable. Nevertheless, it is  
20  
21  
22 327 important to note that guidelines should be updated every three to five years or when new information  
23  
24 328 becomes available.(32, 33)  
25

26 329

27

28 330

29

30

31 331

32

33 332

34

35 333

36

37 334

38

39

40 335

41

42 336

43

44 337

45

46

47 338

48

49 339

50

51 340

52

53 341

54

55 342

56

57 343

58

59

60

### **Implications for clinicians**

Healthcare professionals are encouraged to use a comprehensive approach when using this Delphi consensus. Before proposing PAMs to patients, they must collect their medical history (e.g., comorbidities) to better determine the diagnosis, prognosis, anticipated goals, and expected outcomes.(34) Then, they should incorporate the best research evidence, clinical expertise, patient values, needs, and preferences to propose effective treatments, balancing effectiveness and safety and informing patients about the possibility of trivial adverse events (e.g., pain and erythema at the application site(10) using extracorporeal shock wave therapy). However, when evidence is lacking and moderate to severe harm is likely, caution is advised, and using PAM may be reconsidered. In fact, for precautionary purpose. (35-37) developed statements were not generally extended to other subgroups, such as children and adolescents (due to biological tissue in growth phases(38, 39)), and frail people (e.g., immunocompromised patients), since limited and insufficient literature on harm is available. Generally, all these statements should be adhered to in conjunction with precautions and contraindications under specific circumstances referring to equipment manufacturers' manuals and



1  
2  
3 344 regulatory bodies(40) as well as to previous guidelines(7) and standards established by professional  
4  
5 345 associations.

### 10 347 **Implications for stakeholders**

11  
12 348 Good practices for the safety of patients should be managed by national agencies with a living  
13  
14 349 monitoring system and shared in international initiatives such as the WHO Global Patient Safety  
15  
16 350 Challenge Medication Safety(41) to strengthen systems and practices adopting corrective action  
17  
18 351 within countries. For instance, national and international scientific and technical societies should  
19  
20 352 facilitate disseminating CPGs adopting different strategies, such as storing good clinical practices in  
21  
22 353 shared repository(42) as well as disseminating plain, patient-oriented versions of good clinical  
23  
24 354 practice statements, supporting patient empowerment and making the healthcare system more  
25  
26 355 efficient, tailored and safer.(43, 44) We intend to organize meetings with stakeholders and patients,  
27  
28 356 conduct webinars, and provide education and counseling through pamphlets, videos, and social  
29  
30 357 messages.

### 37 359 **Implications for research**

38  
39 360 We believe that statements developed by the multidisciplinary and multi-professionally panel of  
40  
41 361 experts can be generalized worldwide. These results could provide essential information to produce  
42  
43 362 national (e.g., Good Clinical Practices of the Italian Ministry of Health(45)) and international  
44  
45 363 guidelines to improve patient safety and decrease avoidable harm related to interventions. Studies  
46  
47 364 should convey their efforts to plan and adequately report adverse events before objectively estimating  
48  
49 365 these harms. We call for multicentric randomized controlled trials based on the core outcome set also  
50  
51 366 for harms and not only for benefit.(46) In addition, specific subgroups of populations should be  
52  
53 367 studied. It is a serious matter to exclude a group from research eligibility, and this must be done only  
54  
55 368 when no less restrictive option is sufficient to ensure protection from undue risk.(47)

1  
2  
3 369 Lastly, future studies can better expand our statements to ensure the safest and optimal modality  
4  
5 370 application of the proposed PAMs (e.g., optimal voltage, amperage, frequency, current density, dose),  
6  
7  
8 371 contraindications and precautions, especially for the subgroups mentioned (e.g., children,  
9  
10 372 immunocompromised people).(48)

11  
12 373

### 14 374 **Strength and limitations**

16  
17 375 This is the first effort to provide guidance on the safety of PAMs in physiotherapy and rehabilitation.  
18  
19 376 We strictly followed published guidelines for reporting and conduction. In addition, we *a-priori*  
20  
21  
22 377 publicly registered the consensus criterion used to determine agreement within the Delphi process.  
23  
24 378 (26, 49) We adopted one of the most conservative thresholds for obtaining the consensus (75%)(27),  
25  
26 379 and in all rounds, this was reached with a high percentage of agreements. However, some downsides  
27  
28 380 should be acknowledged. We did not cover statements about the clinical effectiveness of PAMs, as  
29  
30  
31 381 our aim was to make patients, healthcare providers and policy-makers aware about the safety  
32  
33 382 application of PAMs in clinical practice. As well, we did not aim to report specific contraindications  
34  
35 383 as we started collecting evidence from systematic reviews that reported safety outcomes from primary  
36  
37  
38 384 studies, which may not always encompass real-world conditions, such as the presence of  
39  
40 385 comorbidities (e.g., active deep vein thrombosis). In addition, evidence-informed by systematic  
41  
42 386 reviews did not find enough information about risk for a specific population (e.g., hemato-oncological  
43  
44  
45 387 patients with severe immunocompromised or coagulopathy). However, based on the principle of  
46  
47 388 precaution, the panel agreed to add as a general note about precaution in specific subgroups of the  
48  
49 389 population, in the absence of literature. As with all Delphi process, our study relies on national expert  
50  
51 390 response and may not capture the full range of perspectives or experiences.(16, 50) However, we tried  
52  
53  
54 391 to involve multidisciplinary and multi-professional experts (as occurs in clinical practice guidelines)  
55  
56 392 that enable confrontations in anonymity (avoiding negatively influencing outcomes and encouraging  
57  
58 393 balanced consideration of ideas). Then, statements were developed starting from the scoping  
59  
60 394 review(10), which mapped and summarized safety in population and intervention areas without

1  
2  
3 395 assessing the certainty of evidence (e.g., grading of the certainty of evidence).(10) Lastly, even if we  
4  
5 396 generated statements starting from the latest available evidence, we should recognize that adverse  
6  
7  
8 397 events may be under-estimated since safety outcome is commonly poor-reported in the literature (11,  
9  
10 398 12, 51).

## 11 12 399 13 14 **CONCLUSION**

15 400  
16  
17 401 These evidence-based statements inform patients, healthcare professionals, and policy-makers about  
18  
19 402 the safety of a wide range of PAMs in field and conditions of physiotherapy and rehabilitation practice  
20  
21  
22 403 after a comprehensive clinical evaluation of patients' needs. All these statements should be associated  
23  
24 404 to precautions and contraindications for specific cases referring to previous guidelines, equipment  
25  
26 405 manufacturers' manual and regulatory bodies. This consensus can provide a basis for decision-making  
27  
28 406 and future research.  
29  
30  
31  
32  
33  
34  
35  
36  
37  
38  
39  
40  
41  
42  
43  
44  
45  
46  
47  
48  
49  
50  
51  
52  
53  
54  
55  
56  
57  
58  
59  
60

1  
2  
3 407 **DECLARATIONS**

4  
5 408 **Author Contributions**

6  
7 409 Concept/idea/research design: S. Gianola, S. Bargerì, G. Castellini

8  
9 410 Writing: S. Gianola, S. Bargerì, G. Castellini

10  
11 411 Data collection: S. Gianola, S. Bargerì

12  
13 412 Data analysis: S. Gianola, S. Bargerì

14  
15 413 Project management: S. Gianola, S. Bargerì

16  
17 414 Consultation (including review of manuscript before submitting): S. Gianola, S. Bargerì, L.

18  
19 415 Pellicciari, S. Gambazza, G. Rossetini, A. Fulvio, V. Genovese, M. Benedini, E. Proverbio, S.

20  
21 416 Cecchetto, G. Castellini, A. Turolla, and SAFE PAMP Collaborators

22  
23 417

24  
25 418 **Ethics Approval**

26  
27 419 This study was declared exempt from institutional review board review.

28  
29 420

30  
31 421 **Disclosures**

32  
33 422 The authors and SAFE PAMP Collaborators declared they had no conflicts of interest.

34  
35 423

36  
37 424 **Funding**

38  
39 425 This work was supported and funded by Associazione Italiana di Fisioterapia (AIFI). The APC was

40  
41 426 funded by AIFI. This research did not receive specific grant from any funding agency in the public,

42  
43 427 commercial or not-for-profit sectors.

44  
45 428

46  
47 429 **Data sharing statement**

48  
49 430 Research data are stored in OSF repository <https://osf.io/w8kgs/> (19)

50  
51 431

52  
53 432 **Manuscript word count: 3275/4000**

1  
2  
3  
4  
5  
6  
7  
8  
9  
10  
11  
12  
13  
14  
15  
16  
17  
18  
19  
20  
21  
22  
23  
24  
25  
26  
27  
28  
29  
30  
31  
32  
33  
34  
35  
36  
37  
38  
39  
40  
41  
42  
43  
44  
45  
46  
47  
48  
49  
50  
51  
52  
53  
54  
55  
56  
57  
58  
59  
60

433 **Figure 1.** Phases of the RAND Delphi process

434 **Figure 2.** Flow chart of Delphi process

435 **Table 1.** General characteristics of experts panels

436 **Table 2.** Agreement results for each round.

For peer review only

1  
2  
3  
4  
5  
6  
7  
8  
9  
10  
11  
12  
13  
14  
15  
16  
17  
18  
19  
20  
21  
22  
23  
24  
25  
26  
27  
28  
29  
30  
31  
32  
33  
34  
35  
36  
37  
38  
39  
40  
41  
42  
43  
44  
45  
46  
47  
48  
49  
50  
51  
52  
53  
54  
55  
56  
57  
58  
59  
60**REFERENCES**

1. McCann J, Roy C, Ward C. Rehabilitation medicine. Available at <https://www.bsrn.org.uk/downloads/rehabilitationmedicine-final.pdf>. Accessed on May 2023.
2. Kreutzer JS, Gervasio AH, Camplair PS. Primary caregivers' psychological status and family functioning after traumatic brain injury. *Brain injury*. 1994;8(3):197-210.
3. Caserta MS, Lund DA, Wright SD. Exploring the Caregiver Burden Inventory (CBI): further evidence for a multidimensional view of burden. *International journal of aging & human development*. 1996;43(1):21-34.
4. Cameron M. *Physical Agents in Rehabilitation An Evidence-Based Approach to Practice*. 5th Edition ed: Elsevier; 2016.
5. Robertson V, Chipchase L, Laakso L, Whelan K, McKenna L. *Guidelines for the clinical use of electrophysical agents*. 2001.
6. *Guidance for the clinical use of electrophysical agents*. London: Chartered Society of Physiotherapy; 2006.
7. ELECTROPHYSICAL AGENTS - Contraindications And Precautions: An Evidence-Based Approach To Clinical Decision Making In Physical Therapy. *Physiother Can*. 2010;62(5):1-80.
8. Iijima H, Takahashi M. Microcurrent Therapy as a Therapeutic Modality for Musculoskeletal Pain: A Systematic Review Accelerating the Translation From Clinical Trials to Patient Care. *Arch Rehabil Res Clin Transl*. 2021;3(3):100145.
9. Mendes LA, Lima IN, Souza T, do Nascimento GC, Resqueti VR, Fregonezi GA. Motor neuroprosthesis for promoting recovery of function after stroke. *Cochrane Database Syst Rev*. 2020;1(1):Cd012991.
10. Barger S, Pellicciari L, Gallo C, Rossetini G, Castellini G, Gianola S, et al. What is the landscape of evidence about the safety of physical agents used in physical medicine and rehabilitation? A scoping review. *BMJ Open*. 2023;13(6):e068134.
11. Carlesso LC, Macdermid JC, Santaguida LP. Standardization of adverse event terminology and reporting in orthopaedic physical therapy: application to the cervical spine. *J Orthop Sports Phys Ther*. 2010;40(8):455-63.
12. Sachse T, Mathes T, Dorando E, Heß S, Thürmann P, Schmiedl S, et al. A review found heterogeneous approaches and insufficient reporting in overviews on adverse events. *J Clin Epidemiol*. 2022;151:104-12.
13. Moher D, Schulz KF, Simera I, Altman DG. Guidance for developers of health research reporting guidelines. *PLoS Med*. 2010;7(2):e1000217.
14. Hasson F, Keeney S, McKenna H. Research guidelines for the Delphi survey technique. *J Adv Nurs*. 2000;32(4):1008-15.
15. Niederberger M, Spranger J. Delphi Technique in Health Sciences: A Map. *Front Public Health*. 2020;8:457.
16. Junger S, Payne SA, Brine J, Radbruch L, Brearley SG. Guidance on Conducting and Reporting DELphi Studies (CREDES) in palliative care: Recommendations based on a methodological systematic review. *Palliat Med*. 2017;31(8):684-706.
17. Equator network. Enhancing the QUALity and Transparency Of health Research. Available at <https://www.equator-network.org/reporting-guidelines/credes/>. Accessed on September 2023.
18. European Commission. Ethics and data protection. Available at [https://ec.europa.eu/info/funding-tenders/opportunities/docs/2021-2027/horizon/guidance/ethics-and-data-protection\\_he\\_en.pdf](https://ec.europa.eu/info/funding-tenders/opportunities/docs/2021-2027/horizon/guidance/ethics-and-data-protection_he_en.pdf). Accessed on May 2023.
19. [dataset] Gianola, S., Barger S., Castellini, G., Gambazza, S., Rossetini, G., Turolla, A., & Pellicciari, L. Data from: Italian suggestions about the safety of physical agents in physical therapy and rehabilitation medicine. Open Science Framework repository (OSF), October 4, 2023. <https://osf.io/w8kgs/>.

1

2

3 486

4 487

5 488

6 489

7 490

8 491

9 492

10 493

11 494

12 495

13 496

14 497

15 498

16 499

17 500

18 501

19 502

20 503

21 504

22 505

23 506

24 507

25 508

26 509

27 510

28 511

29 512

30 513

31 514

32 515

33 516

34 517

35 518

36 519

37 520

38 521

39 522

40 523

41 524

42 525

43 526

44 527

45 528

46 529

47 530

48 531

49 532

50 533

51 534

52 535

53 536

54 537

55 538

56 539

57 540

58 541

59 542

60

20. Associazione Italiana di Fisioterapia (AIFI). Available at <https://aifi.net/>. Accessed on September 2023.

21. Legge 8 marzo 2017, n. 24 Disposizioni in materia di sicurezza delle cure e della persona assistita, nonché in materia di responsabilità professionale degli esercenti le professioni sanitarie. Available at <https://www.gazzettaufficiale.it/eli/id/2017/03/17/17G00041/sg> Accessed on April 2022.

22. Basagni B, Navarrete E, Bertoni D, Cattran C, Mapelli D, Oddy M, et al. The Italian version of the Brain Injury Rehabilitation Trust (BIRT) personality questionnaires: five new measures of personality change after acquired brain injury. *Neurological sciences : official journal of the Italian Neurological Society and of the Italian Society of Clinical Neurophysiology*. 2015;36(10):1793-8.

23. Akins RB, Tolson H, Cole BR. Stability of response characteristics of a Delphi panel: application of bootstrap data expansion. *BMC Med Res Methodol*. 2005;5:37.

24. Birko S, Dove ES, Ozdemir V. Evaluation of Nine Consensus Indices in Delphi Foresight Research and Their Dependency on Delphi Survey Characteristics: A Simulation Study and Debate on Delphi Design and Interpretation. *PLoS One*. 2015;10(8):e0135162.

25. Cittadinanzattiva. Available at <https://www.cittadinanzattiva.it/>. Accessed on October 2023.

26. Grant S, Booth M, Khodyakov D. Lack of preregistered analysis plans allows unacceptable data mining for and selective reporting of consensus in Delphi studies. *J Clin Epidemiol*. 2018;99:96-105.

27. Diamond IR, Grant RC, Feldman BM, Pencharz PB, Ling SC, Moore AM, et al. Defining consensus: a systematic review recommends methodologic criteria for reporting of Delphi studies. *J Clin Epidemiol*. 2014;67(4):401-9.

28. Fincham JE. Response rates and responsiveness for surveys, standards, and the Journal. *Am J Pharm Educ*. 2008;72(2):43.

29. Physical Agents and Mechanical Modalities. *Am J Occup Ther*. 2018;72(Supplement\_2):7212410055p1-p6.

30. International Society for Medical Shockwave Treatment (ISMST). Consensus statement on ESWT Indications and Contraindications. Available at [https://www.shockwavetherapy.org/fileadmin/user\\_upload/ISMST\\_Guidelines.pdf](https://www.shockwavetherapy.org/fileadmin/user_upload/ISMST_Guidelines.pdf). Accessed on October 2023.

31. de Campos TF. Low back pain and sciatica in over 16s: assessment and management NICE Guideline [NG59]. *J Physiother*. 2017;63(2):120.

32. Shekelle PG, Ortiz E, Rhodes S, Morton SC, Eccles MP, Grimshaw JM, et al. Validity of the Agency for Healthcare Research and Quality clinical practice guidelines: how quickly do guidelines become outdated? *Jama*. 2001;286(12):1461-7.

33. Shekelle P, Eccles MP, Grimshaw JM, Woolf SH. When should clinical guidelines be updated? *Bmj*. 2001;323(7305):155-7.

34. WCPT. Standards of physical therapy practice <https://world.physio/sites/default/files/2020-07/G-2011-Standards-practice.pdf>.

35. European Parliament. The precautionary principle: Definitions, applications and governance. Available at [https://www.europarl.europa.eu/thinktank/en/document/EPRS\\_IDA\(2015\)573876](https://www.europarl.europa.eu/thinktank/en/document/EPRS_IDA(2015)573876). Accessed on May 2023.

36. Commission. E. The precautionary principle: decision making under uncertainty. Available at [https://ec.europa.eu/environment/integration/research/newsalert/pdf/precautionary\\_principle\\_decisi\\_on\\_making\\_under\\_uncertainty\\_FB18\\_en.pdf](https://ec.europa.eu/environment/integration/research/newsalert/pdf/precautionary_principle_decisi_on_making_under_uncertainty_FB18_en.pdf). Accessed on July 2023.

37. European Parliament. The precautionary principle. Available at [https://www.europarl.europa.eu/RegData/etudes/IDAN/2015/573876/EPRS\\_IDA\(2015\)573876\\_EN.pdf](https://www.europarl.europa.eu/RegData/etudes/IDAN/2015/573876/EPRS_IDA(2015)573876_EN.pdf). Accessed on January 2024.



1

2

3 535 38. Yeom M, Kim SH, Lee B, Zhang X, Lee H, Hahm DH, et al. Effects of laser acupuncture on  
4 536 longitudinal bone growth in adolescent rats. *Evid Based Complement Alternat Med*.  
5 537 2013;2013:424587.

6 538 39. Nguyen JC, Markhardt BK, Merrow AC, Dwek JR. Imaging of Pediatric Growth Plate  
7 539 Disturbances. *Radiographics*. 2017;37(6):1791-812.

9 540 40. EUDAMED - European database on medical devices. Available at  
10 541 <https://ec.europa.eu/tools/eudamed/#/screen/home>. Accessed on September 2023.

11 542 41. WHO Global Patient Safety Challenge on Medication Without Harm. Available at  
12 543 <https://www.who.int/publications/i/item/WHO-HIS-SDS-2017.6>. Accessed on June 2023.

13 544 42. AGENAS. Agenzia Nazionale per i Servizi Sanitari Regionali. Available at  
14 545 <https://www.agenas.gov.it/comunicazione/primo-piano/2111-avvio-call-for-good-practice-2022>.  
15 546 Accessed on May 2023.

17 547 43. Odone A, Buttigieg S, Ricciardi W, Azzopardi-Muscat N, Staines A. Public health  
18 548 digitalization in Europe. *Eur J Public Health*. 2019;29(Supplement\_3):28-35.

19 549 44. Santesso N, Morgano GP, Jack SM, Haynes RB, Hill S, Treweek S, et al. Dissemination of  
20 550 Clinical Practice Guidelines: A Content Analysis of Patient Versions. *Med Decis Making*.  
21 551 2016;36(6):692-702.

23 552 45. Sistema Nazionale Linee Guida - ISS. Buone Pratiche Clinico Assistenziali. Available at  
24 553 <https://www.iss.it/snlg-buone-pratiche>. Accessed on January 2024.

25 554 46. COMET Initiative. Available at [https://www.comet-](https://www.comet-initiative.org/Resources/AdverseEventOutcomes)  
26 555 [initiative.org/Resources/AdverseEventOutcomes](https://www.comet-initiative.org/Resources/AdverseEventOutcomes). Accessed on April 2022.

27 556 47. Langford A, Bateman-House A. Clinical trials for COVID-19: Populations most vulnerable  
28 557 to COVID-19 must be included. *Health Affairs Blog Retrieved December*. 2020;1.

30 558 48. Thabet AA, Ebid AA, El-Boshy ME, Almuwallad AO, Hudaimoor EA, Alsaedi FE, et al.  
31 559 Pulsed high-intensity laser therapy versus low level laser therapy in the management of primary  
32 560 dysmenorrhea. *J Phys Ther Sci*. 2021;33(9):695-9.

33 561 49. De Meyer D, Kottner J, Beele H, Schmitt J, Lange T, Van Hecke A, et al. Delphi procedure  
34 562 in core outcome set development: rating scale and consensus criteria determined outcome selection.  
35 563 *J Clin Epidemiol*. 2019;111:23-31.

36 564 50. Fink-Hafner D, Dagen T, Doušak M, Novak M, Hafner-Fink M. Delphi Method: Strengths  
37 565 and Weaknesses. *Advances in Methodology and Statistics*. 2019;2:1-19.

39 566 51. Dal-Re R, Ioannidis JP, Bracken MB, Buffler PA, Chan AW, Franco EL, et al. Making  
40 567 prospective registration of observational research a reality. *Sci Transl Med*. 2014;6(224):224cm1.

41

42

43

44

45

46

47

48

49

50

51

52

53

54

55

56

57

58

59

60



569 **Tables**

570

**Table 1. General characteristics of experts panel (n=17)**

| <b>Professional profile*</b> | <b>Responses N (%)</b> |
|------------------------------|------------------------|
| Clinicians                   | 15 (88.2)              |
| Researchers                  | 7 (41.2)               |
| Management                   | 4 (23.5)               |
| <b>Field of expertise*</b>   |                        |
| Musculoskeletal              | 8 (47.1)               |
| Pelvic floor disorders       | 4 (23.5)               |
| Neurological                 | 3 (17.6)               |
| Lymphatic disorders          | 1 (5.9)                |
| Paediatrics                  | 1 (5.9)                |
| Lay member (Patient)         | 1 (5.9)                |
| Forensic member              | 1 (5.9)                |

\*More than one answer was possible

572 **Table 2. Agreement results for each round**

| Statements about the safety of...                                 | ROUND 1                                                  |                                                             | ROUND 2                                                  |                                                             | FINAL LIST |     |
|-------------------------------------------------------------------|----------------------------------------------------------|-------------------------------------------------------------|----------------------------------------------------------|-------------------------------------------------------------|------------|-----|
|                                                                   | Percentage of agreement (7-9 points on the Likert scale) | Percentage of disagreement (1-3 points on the Likert scale) | Percentage of agreement (7-9 points on the Likert scale) | Percentage of disagreement (1-3 points on the Likert scale) | Approved   | NME |
| Electrical stimulation                                            | 85.7                                                     | 7.1                                                         | 85.7                                                     | 0.0                                                         | 100.0      | 0.0 |
| Neuromodulation, antalgic, and interferential electrical currents | 100.0                                                    | 0.0                                                         | 100.0                                                    | 0.0                                                         | 100.0      | 0.0 |
| Extracorporeal shock wave therapy                                 | 83.3                                                     | 0.0                                                         | 76.9                                                     | 0.0                                                         | 100.0      | 0.0 |
| Laser therapy                                                     | 84.6                                                     | 7.7                                                         | 90.9                                                     | 0.0                                                         | 100.0      | 0.0 |
| Electromagnetic therapy                                           | 81.8                                                     | 9.1                                                         | 76.9                                                     | 0.0                                                         | 100.0      | 0.0 |
| Diathermy                                                         | 90.0                                                     | 10.0                                                        | 84.6                                                     | 0.0                                                         | 100.0      | 0.0 |
| Hot thermal agents                                                | 81.8                                                     | 9.1                                                         | 91.7                                                     | 0.0                                                         | 100.0      | 0.0 |
| Cryotherapy                                                       | 75.0                                                     | 0.0                                                         | 90.9                                                     | 0.0                                                         | 94.2       | 5.8 |
| Therapeutic ultrasound                                            | 90.9                                                     | 0.0                                                         | 91.7                                                     | 0.0                                                         | 100.0      | 0.0 |
| General note <sup>^</sup>                                         | -                                                        | -                                                           | -                                                        | -                                                           | 100.0      | 0.0 |

573 <sup>^</sup>added for the Final Criteria List

574 Abbreviations: NME: not my expertise

## 575 **Appendix 1. Final criteria list**

### 576 **Introduction**

577 The statements are focused on adult population. Each statement was developed based on the scientific  
578 literature (i.e., evidence) and experience of content experts of Associazione Italiana di Fisioterapia -  
579 AIFI (i.e., expertise) with details for clinical conditions/populations in the relevant rehabilitation  
580 fields.

581 *Target group:* statements were developed for adults (> 18 years). Physical agents modalities are  
582 delivered by expert healthcare professionals (who had undergone formal education and training) to  
583 ensure patient safety in both inpatient and outpatient settings.

584 *Conditions of application:* statements were presented within the relevant rehabilitation field  
585 according to *informed-evidence* and *expertise-based* consensus.

586 *Evidence:* This section has been defined on the basis of a scoping review of the literature conducted  
587 by two independent reviewers that focused on safety of PAMs from 117 systematic reviews in  
588 physiotherapy and rehabilitation medicine (10).

589 *Expertise:* this section has been formulated by the steering committee which included different  
590 content experts of AIFI (e.g., neurological, musculoskeletal, pelvic floor, physical therapies), with  
591 additional inputs from the multidisciplinary and multi-professional panel of experts.

### 592 **Final list of statements**

593 **1. Electrical stimulation (e.g., Functional electrical stimulation (FES), Neuromuscular**  
594 **electrical stimulation (NMES), Electrical muscle stimulation (EMS)) is safe in the adult**  
595 **population**

1

2

3 596 - *in musculoskeletal disorders, especially in the following conditions:*

4

5

6

7 597 o Evidence: neck pain, knee osteoarthritis, musculoskeletal pain, muscle hypotrophy.

8

9

10 598 o Expertise: spinal osteoarthritis, knee osteoarthritis, musculoskeletal pain, knee

11

12 599 osteoarthritis, muscle and joint pain.

13

14

15

16 600 - *in pelvis-perineal disorders, especially in the following conditions:*

17

18

19 601 o Evidence: urinary incontinence, fecal incontinence, lower urinary tract symptoms in

20

21 602 postpartum women, overactive bladder.

22

23

24

25 603 o Expertise: prolapse, descending perineum syndrome, perineal hypotonia, bladder-sphincter

26

27 604 or anorectal dyssynergia, erectile dysfunction, premature ejaculation, abdominal diastasis.

28

29

30 605 - *in neurological disorders, especially in the following conditions:*

31

32

33

34 606 o Evidence: migraine, spasticity in multiple sclerosis, stroke, spinal cord injury.

35

36

37 607 o Expertise: post-stroke urinary incontinence, neurogenic bowel dysfunction in spinal cord

38

39 608 injury, second motor neuron disease (e.g., Amyotrophic Lateral Sclerosis), muscular

40

41 609 dystrophies, head trauma, lesions of the peripheral nervous system.

42

43

44

45

46 610

47

48

49 611 **2. Neuromodulation, antalgic and interferential electrical currents (e.g., TransCutaneous**

50

51 612 **Electrical Nerve Stimulation (TENS), Transcutaneous Tibialis Posterior Stimulation (TTNS))**

52

53 613 **are safe in the adult population**

54

55

56

57 614 - *in musculoskeletal disorders, especially in the following conditions:*

58

59

60

1  
2  
3 615 o Evidence: low back pain, neck pain, rotator cuff disease, whiplash-associated disorders,  
4  
5 616 fibromyalgia.

6  
7  
8  
9 617 o Expertise: musculoskeletal pain, spine osteoarthritis, neuropathic pain.

10  
11  
12 618 - *in pelvis-perineal disorders, especially in the following conditions:*

13  
14  
15  
16 619 o Evidence: overactive bladder, urinary incontinence, fecal incontinence, persistent pelvic  
17  
18 620 pain.

19  
20  
21  
22 621 o Expertise: Urinary incontinence, pudendal neuralgia, constipation, urinary retention.

23  
24  
25 622 - *in neurological disorders, especially in the following conditions:*

26  
27  
28  
29 623 o Evidence: neuropathic pain, stroke, multiple sclerosis, neurogenic bowel dysfunction after  
30  
31 624 spinal cord injury.

32  
33  
34 625 o Expertise: neurogenic bladder dysfunction after central and peripheral nervous system  
35  
36 626 injuries.

37  
38  
39  
40 627

41  
42  
43  
44 628 **3. Extracorporeal shock wave therapy (radial and focal) is safe in the adult population**

45  
46  
47 629 - *in musculoskeletal disorders, especially in the following conditions:*

48  
49  
50 630 o Evidence: soft tissue disorders of the lower limbs, knee tendinopathy, Achilles  
51  
52  
53 631 tendinopathy, osteoarthritis, plantar fasciitis, rotator cuff disease, shoulder tendinopathy and  
54  
55 632 calcifications, acute fracture, orthopedic disorders, consolidation delays, other soft tissue  
56  
57 633 disorders.

58  
59  
60

1  
2  
3  
4  
5  
6  
7  
8  
9  
10  
11  
12  
13  
14  
15  
16  
17  
18  
19  
20  
21  
22  
23  
24  
25  
26  
27  
28  
29  
30  
31  
32  
33  
34  
35  
36  
37  
38  
39  
40  
41  
42  
43  
44  
45  
46  
47  
48  
49  
50  
51  
52  
53  
54  
55  
56  
57  
58  
59  
60

634 o Expertise: enthesopathies of the upper and lower limbs, calcifications, epicondylitis,  
635 epitrocleitis, muscle injuries, muscle contractures, and trigger points.

636 - in neurological disorders, especially in the following conditions:

637 o Evidence: post-stroke lower limb spasticity, multiple sclerosis spasticity.

638 o Expertise: spasticity following head trauma, spasticity following spinal cord injury.

639 - in pelvis-perineal disorders, especially in the following conditions:

640 o Evidence: chronic prostatitis/chronic pelvic pain syndrome.

641 o Expertise: persistent female pelvic pain, Peronye's disease.

642 Patients should be informed of the potential undesirable effects after applying ESWT. Indeed, a  
643 recent literature review showed some expected mild adverse events, such as pain and erythema, at  
644 the application site.(10)

646 **4. Laser therapy (e.g., low-level laser therapy (LLLT), high-level laser therapy (HLLT)) is**  
647 **safe in the adult population**

648 - in musculoskeletal disorders, especially in the following conditions:

649 o Evidence: low back pain, Achilles tendinopathy, rotator cuff disease, capsulitis adhesive,  
650 lower extremity soft tissue disorders, frozen shoulder, carpal tunnel syndrome, knee  
651 osteoarthritis, neck pain, whiplash associated disorders.

1

2

3 652 o Expertise: upper and lower limb tendinopathy, acute arthropathy, acute muscle and tendon

4

5 653 injuries, acute musculoskeletal pain. Upper and lower limb tendinopathy, acute arthropathy,

6

7 654 acute muscle and tendon injury, and acute musculoskeletal pain.

8

9

10

11

12

13

14

15

16

17

18

19

20

21

22

23

24

25

26

27

28

29

30

31

32

33

34

35

36

37

38

39

40

41

42

43

44

45

46

47

48

49

50

51

52

53

54

55

56

57

58

59

60

655 - *in pelvis-perineal disorders (extracavitary LLLT only), especially in the following conditions:*

656 o Evidence: Urinary incontinence and pelvic organ prolapse, persistent pelvic pain.

657 o Expertise: healing (episiotomies, laparotomies, lacerations, etc.), inflammatory pelvic

658 pain, edema or perineal hematomas.

659 - *in lymphatic disorders (LLLT only), especially in the following conditions:*

660 o Evidence: secondary lymphoedema (e.g., breast cancer-related lymphedema).

661 o Expertise: lymphoedema

662 - *in neurological disorders (LLLT only), especially in the following conditions:*

663 o Evidence: Bell's palsy

664 o Expertise: stroke, multiple sclerosis, spinal cord injury, head trauma, peripheral nerve

665 injury.

666 **5. Electromagnetic therapy (e.g., Pulsed ElectroMagnetic Field Therapy (PEMFT), repetitive**

667 **Peripheral Magnetic Stimulation (rPMS)) is safe in the adult population**

668 - *in musculoskeletal disorders, especially in the following conditions:*

669 o Evidence: neck pain, fractures, consolidation delays.

670 o Expertise: osteoporosis, bone edema, algodystrophy, arthrosis.

1

2

3 671 - in pelvis-perineal disorders, especially in the following conditions:

4

5

6

7 672 o Evidence: persistent pelvic pain and urinary incontinence.

8

9

10 673 o Expertise: fecal incontinence, prolapse, descending perineum syndrome, perineal

11

12 674 hypotonia, vesico-sphincteric or anorectal dyssynergia, pudendal neuralgia, pelvic pain

13

14

15 675 acute, erectile dysfunction, premature ejaculation, diastasis recti.

16

17

## 18 676 **6. Diathermy (e.g., Short Wave Tecar Therapy) is safe in the adult population**

19

20

21

22 677 - in musculoskeletal disorders, especially in the following conditions:

23

24

25 678 o Evidence: rotator cuff disease, knee osteoarthritis.

26

27

28 679 o Expertise: sub-acute/persistent muscle injuries, DOMS/DOMER, arthropathies (non-

29

30 680 acute), osteoarthritis, muscle contractures, trigger points.

31

32

33

34 681 - in pelvis-perineal disorders, especially in the following conditions:

35

36

37

38 682 o Evidence: inflammatory pelvic pain, persistent pelvic pain, sexual dysfunction (Peronye's  
39 disease).

40

41

42

43 684 o Expertise: prolapse, stress urinary incontinence, scarring (episiotomies, laparotomies,

44

45

46 685 lacerations, etc.), perineal edema or hematoma, vulvovaginal dystrophy and dryness,

47

48

48 686 abdominal diastasis.

49

50

51

## 52 687 **7. Hot thermal agent modalities (e.g., drug-free heat wrap) are safe in the adult population**

53

54

55 688 - in musculoskeletal disorders, especially in the following conditions:

56

57

58

59 689 o Evidence: groin pain, low back pain.

60



- 1  
2  
3 690 o Expertise: sub-acute/persistent muscle injuries, DOMS/DOMER, arthropathies (non-  
4  
5 691 acute), osteoarthritis  
6  
7  
8

9 692

10  
11  
12 693 **8. Cryotherapy (e.g., ice or liquid nitrogen) is safe in the adult population**

13  
14  
15  
16 694 *- in musculoskeletal disorders, especially in the following conditions:*

- 17  
18  
19 695 o Evidence: arthroscopy, reconstruction of the anterior cruciate ligament, post-surgery.  
20  
21

- 22  
23 696 o Expertise: Delayed Onset Muscle Soreness (DOMS)/Delayed Onset Muscle Soreness  
24  
25 697 (DOMER), post-surgery, post-trauma (48h).  
26  
27

28  
29 698

30  
31  
32 699 **9. Therapeutic Ultrasound is safe in the adult population**

33  
34  
35 700 *- in musculoskeletal disorders, especially in the following conditions:*

- 36  
37  
38  
39 701 o Evidence: back pain, neck pain, carpal tunnel, rotator cuff disorder, lower limb soft-tissue  
40  
41 702 disorder, knee osteoarthritis, fracture, acute fracture, ankle fracture, ankle and knee sprains,  
42  
43

- 44  
45 703 o Expertise: hand and foot osteoarthritis, calcifications, enthesitis.  
46  
47

48 704 **General notes and considerations related to subgroups:**

49  
50  
51 705 Following a confirmed clinical prescription, applying the above physical therapies is safe in the  
52  
53  
54 706 adult population (>18 years) under the supervision of an expert operator. For precautionary reasons,  
55  
56 707 these statements are not extended to other subgroups of patients (e.g., children, adolescents, frail  
57  
58 708 population, etc.) since insufficient literature is available.  
59  
60

1  
2  
3  
4  
5  
6  
7  
8  
9  
10  
11  
12  
13  
14  
15  
16  
17  
18  
19  
20  
21  
22  
23  
24  
25  
26  
27  
28  
29  
30  
31  
32  
33  
34  
35  
36  
37  
38  
39  
40  
41  
42  
43  
44  
45  
46  
47  
48  
49  
50  
51  
52  
53  
54  
55  
56  
57  
58  
59  
60

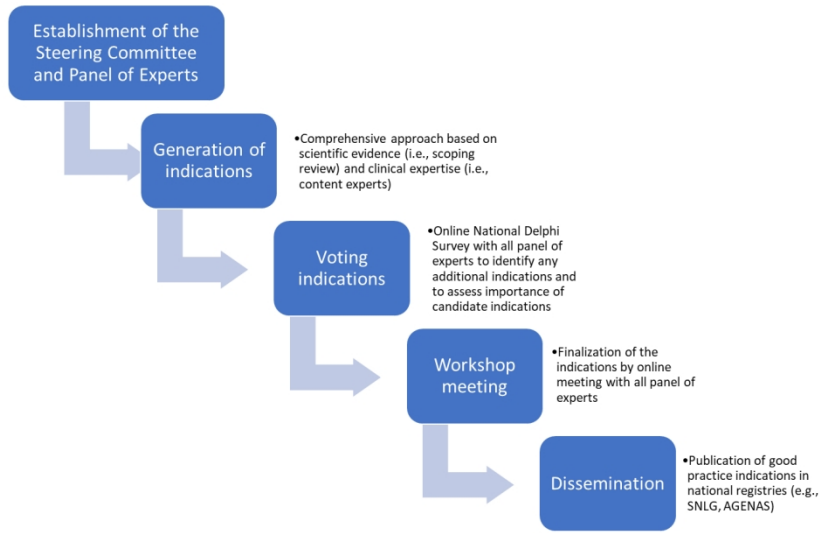

Figure 1

282x150mm (150 x 150 DPI)

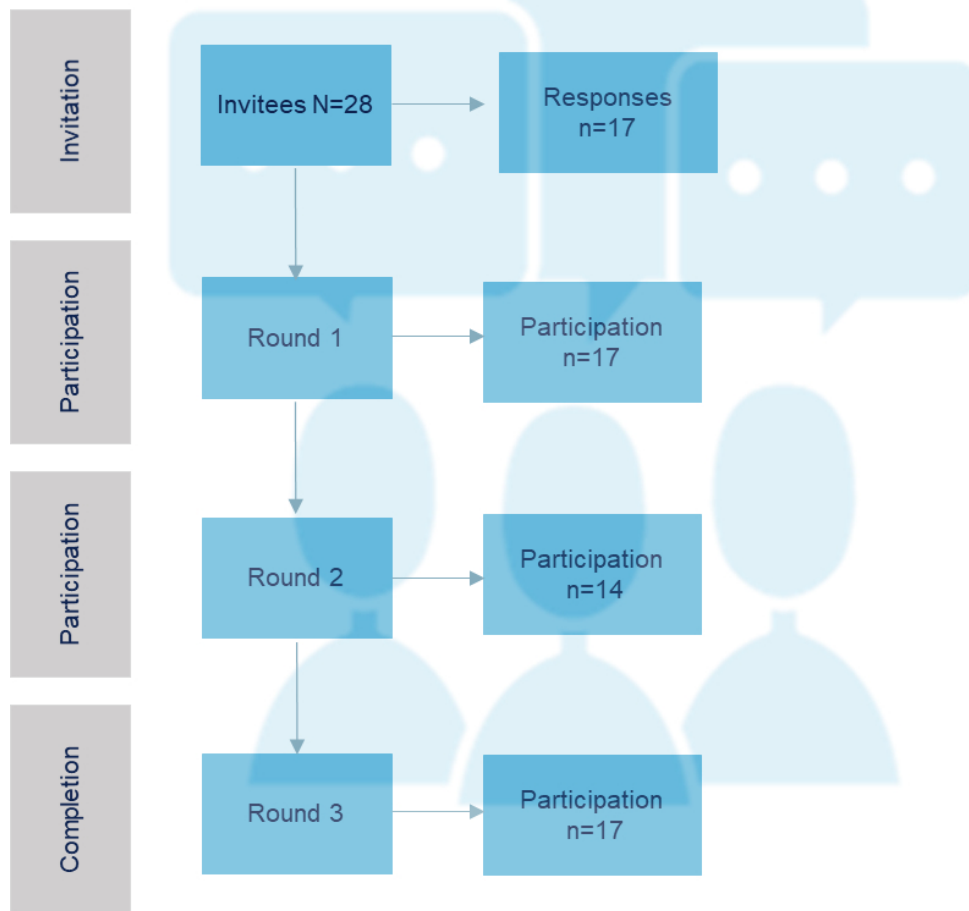

Figure 2

138x140mm (150 x 150 DPI)

1  
2  
3  
4  
5  
6  
7  
8  
9  
10  
11  
12  
13  
14  
15  
16  
17  
18  
19  
20  
21  
22  
23  
24  
25  
26  
27  
28  
29  
30  
31  
32  
33  
34  
35  
36  
37  
38  
39  
40  
41  
42  
43  
44  
45  
46  
47  
48  
49  
50  
51  
52  
53  
54  
55  
56  
57  
58  
59  
60

**Supplementary Files**

*Supplementary File 1. Ethical considerations* .....2  
*Supplementary File 2. Physical agent modalities description*.....3  
*Supplementary File 3. Declaration of interest* .....6  
*Supplementary File 4. Panel of experts comments* .....9  
**REFERENCES**.....12

For peer review only

## Supplementary File 1. Ethical considerations

Participation in the Delphi survey is voluntary and by invitation. The questionnaire includes a beginning section to acquire consent and privacy for data processing. Participants are informed that the responses will have 'remained total confidentiality according to the Regulation on the protection of personal data' 679/2016 of the European Union, and that the results will be used for research purposes and a document shared at the corporate level<sup>1</sup>. The interested party may be interested in the rights provided for by art. 15, 16, 17, 18, 20, 21 and 22 of the Regulation mentioned above.

Database randomization and differential privacy access were achieved. In addition, "anonymization" by generalizing was performed.<sup>2</sup> The study project and data collection were managed and anonymously entrusted by the Unit of Clinical Epidemiology of IRCCS Istituto Ortopedico Galeazzi based in Milano. The data subject cannot be re-identified and is therefore outside the scope of the data protection law<sup>3</sup>.

The row dataset was accessible to two researchers (SG, SB) excluded from participation in Delphi for the quantitative and qualitative analyses. This practice complies with the European standards for the use of aggregative data where the data subject cannot be re-identified, are not personal data and are therefore outside the scope of data protection law<sup>3</sup>. The final report only contains aggregate data. In the final document, we reported the names of the participants who have completed all rounds and gave their consent to disclose their names.

## Supplementary File 2. Physical agent modalities description

1  
2  
3  
4  
5  
6 **1) Electrical stimulation:** electrotherapeutic currents and waveforms to facilitate neuromuscular or  
7 sensory activity to improve muscle strength and reeducate muscle function.<sup>4</sup>  
8

- 9  
10  
11  
12  
13  
14  
15  
16  
17  
18  
19  
20  
21  
22
- Neuromuscular electrical stimulation (NMES): use of pulsed currents to stimulate motor nerves, which in turn produce tetanic contractions of the neuromuscular spindles, with or without joint movement.<sup>5</sup>
  - Functional Electrical Stimulation (FES) uses electrical pulses to stimulate motor neurons or denervated muscle fibers directly to elicit a contraction during a functional activity (e.g., gait). FES is used in the treatment of orthopedic and neurological conditions.<sup>6</sup>

23  
24 **2) Neuromodulation, analgic and interferential electrical currents :** electrotherapeutic currents  
25 and waveforms to influence physiological effects on the patient's body structures and functions  
26 aiming to modulate pain.<sup>4</sup>  
27

- 28  
29  
30  
31  
32  
33  
34  
35  
36  
37  
38  
39  
40  
41  
42  
43  
44  
45  
46  
47  
48  
49
- Transcutaneous electrical nerve stimulation (TENS): delivers electrical stimulation via electrodes placed over the intact skin surface near the source of pain to produce analgesia or hypoalgesia. A wide variety of pulsed waveforms are used, with frequencies typically in the range of 1-100Hz. The intensities are set to produce sensory stimulations alone or in combination with motor stimulations to produce muscle twitches (acupuncture-like TENS).<sup>7</sup>
  - Transcutaneous Tibialis Posterior Stimulation (TTNS): a form of neuromodulation involving the use of electrical impulses to address urinary symptoms (e.g. overactive bladder) with inhibitory action on neurons of the spinothalamic tract (S2-S3).<sup>8</sup>
  - Interferential current (IC): involves crossing two medium frequency currents (most commonly 4000 Hz), which reportedly generates a low-frequency 'beating' (amplitude-modulated) effect at between 0 and 150 Hz in the deep tissues.<sup>9</sup> These beat frequencies are believed to decrease pain, increase circulation and block nerve conduction.

50  
51  
52  
53  
54  
55  
56

**3) Extracorporeal shock wave therapy:** a nonsurgical treatment that uses the phenomenon of mechanotransduction (i.e., adapting cells biochemical activity, influencing cells migration, proliferation, differentiation and apoptosis)<sup>10 11</sup> to treat various musculoskeletal conditions (e.g., plantar fasciitis; tennis elbow). Shock wave therapy can be either extracorporeal or radial.<sup>12</sup>

- 57  
58  
59  
60
- Extracorporeal shock wave therapy (ESWT) involves passing sound waves (or shock waves) through the skin to the affected area. Shock waves are single pulsed acoustic or sonic waves, which dissipate mechanical energy at the interface of two substances with different acoustic impedance.<sup>13</sup> They are produced by generators of an electrical energy source and require an electroacoustic conversion mechanism and a focusing

1  
2  
3 device. Three types of systems can be distinguished based upon the sound source:  
4 electrohydraulic, electromagnetic and piezoelectric systems. Various doses appear to  
5 be used, with no apparent consensus on the minimum therapeutic dose. As defined  
6 defined by Cacchio 2006<sup>14</sup> as low-energy shock waves is less than 0.1 mJ/mm<sup>2</sup> and  
7 high-energy shock waves: is 0.2 mJ/mm<sup>2</sup> to 0.4 mJ/mm<sup>2</sup>).

- 8  
9 - Radial shock wave therapy (RSWT) is generated through the acceleration of a  
10 projectile inside the handpiece of the treatment device and then transmitted radially  
11 from the tip of the applicator to the target zone. Radial shock waves show a lower  
12 peak pressure and a considerably longer rise time than extracorporeal shock waves.  
13 In RSWT, the focal point is not centred on a target zone, as occurs in focal ESWT,  
14 but on the tip of the applicator.<sup>14</sup>

15  
16  
17 **4) Laser therapy:** light source treatment, non-invasive, widely used to treat various  
18 musculoskeletal conditions.

- 19  
20  
21 - Low-level laser therapy (LLLT) generates a beam of light with a particular  
22 wavelength that can deliver light energy to tissue depths below the dermis<sup>15</sup>.  
23 Studies suggest that LLLT contributes to pain relief by reducing pro-inflammatory  
24 cytokines<sup>16</sup>. The effects of LLLT are considered to be dependent on dosage,  
25 wavelength, site and duration of treatment.<sup>15 16</sup>
- 26  
27  
28 - high level laser therapy (HLLT): laser with an output power greater than 500 mW  
29 or 0.5 Watts. HLLT creates heat on the surface of the skin due to their higher power  
30 density (irradiance).<sup>17</sup>

31  
32  
33  
34 **5) Electromagnetic therapy:** based on Faraday's law of electromagnetic induction, to promote  
35 bone healing, treat osteoarthritis and inflammatory diseases of the musculoskeletal system,  
36 alleviate pain, enhance healing of ulcers and reduce spasticity<sup>18</sup>.

- 37  
38 - Pulsed Electromagnetic Field therapy (PEMF), which involves the delivery of pulsing (that  
39 is 'on-off') low-frequency magnetic fields through the body, which is believed to provide  
40 temporary pain relief by influencing tissue generation and cell proliferation.<sup>19</sup>

41  
42  
43 - Repetitive magnetic stimulation (rMS), which allows the transcutaneous induction of nerve  
44 stimulating electric currents. This technique requires extremely strong and sharp magnetic  
45 impulses (for example 15,000 amperes peak current; 2.5 T field strength; < 1 msec) applied  
46 by specially designed coils (< 10 cm) over the target area. Modern devices allow the repetition  
47 of up to 60 impulses per second. Mainly developed to study and influence brain functions,  
48 rMS also stimulates spinal chord fibres and peripheral nerves. Initial studies used peripheral  
49 rMS for therapeutic reasons, such as in myofascial pain syndrome<sup>20</sup>. Since the resulting small  
50 electric impulses are the nerve stimulating factor, rMS effects may be similar to TENS.

51  
52  
53  
54 **6) Shortwave and microwave Diathermy**

- 55  
56 - Tecartherapy or radiofrequency diathermy (RFD) is a non-invasive therapy and  
57 consists in the emission of high-frequency electromagnetic waves which increase  
58 tissue metabolism. This process promotes tissue repair and affects pain  
59 sensitivity.<sup>21 22 23</sup>

- 1  
2  
3  
4  
5  
6  
7  
8  
9  
10  
11  
12  
13  
14  
15  
16  
17  
18  
19  
20  
21  
22  
23  
24  
25  
26  
27  
28  
29  
30  
31  
32  
33  
34  
35  
36  
37  
38  
39  
40  
41  
42  
43  
44  
45  
46  
47  
48  
49  
50  
51  
52  
53  
54  
55  
56  
57  
58  
59  
60
- Microwave diathermy: a deep heating modality that converts electromagnetic energy to thermal energy. Frequencies approved for therapeutic microwave are 915 MHz (wavelength 33 cm) and 2,456 MHz (wavelength 12 cm). The lower frequency has the advantage of increased depth of penetration but also the disadvantages of greater beam dispersion and the requirement of larger applicators. If muscle heating is primary objective, 915-MHz applicators are preferable to 2,456-MHz applicators. Average temperatures of approximately 41°C at a depth of 1–3 cm have been demonstrated<sup>24</sup>

- 7) **Hot thermal agents:** heat transferred from an object with direct contact to the body. Heat therapy include hot packs, heatwraps, hot/warm water immersion, sauna. Heat treatment increases metabolism in tissues, promotes blood circulation and reduces pain. The temperature of the heat therapy is generally 35–40°C.<sup>25 26</sup>
- 8) **Cryotherapy:** cold is transferred from an object with direct contact to the body. Examples include cold packs, cold-water immersion ( $\leq 15^{\circ}\text{C}$ ), ice massage, the novel modality of cryotherapy. Cryotherapy is a treatment involving very short exposures to extremely cold dry air to the whole patient or a treatment area (mean temperature of the cryotherapy chamber is at  $-30^{\circ}\text{C}$ ,  $-80$  to  $-110^{\circ}\text{C}$ , or  $< -110^{\circ}\text{C}$ ). Cold treatment is thought to reduce swelling and cell metabolism, minimizing oedema, pain and injury.<sup>25 27</sup>
- 9) **Therapeutic Ultrasound:** delivers energy to deep tissue sites through ultrasonic waves (often at frequencies of 1 or 3 MHz and intensities between 0.1 watts/cm<sup>2</sup> and 3 watts/cm<sup>2</sup>) using a crystal sound head. Treatment can be delivered in two forms, continuous (non- stop ultrasonic waves) and pulsed (intermittent ultrasonic waves<sup>22 28</sup>). The treatment aim to increase tissue temperature and induce non-thermal physiological changes (such as cell permeability and cell growth), which are believed to promote soft tissue healing and muscle relaxation.<sup>29</sup>



### Supplementary File 3. Declaration of interest

| Name and Surname        | Affiliation                                                                                                                         | Scientific and Technical Societies                                                                                                                                       | Conflict of interest declared |
|-------------------------|-------------------------------------------------------------------------------------------------------------------------------------|--------------------------------------------------------------------------------------------------------------------------------------------------------------------------|-------------------------------|
| <b>Armando Perrotta</b> | IRCCS Neuromed,<br>Pozzilli (IS)                                                                                                    | Società Italiana per lo Studio delle<br>Cefalee (SISC)                                                                                                                   | none                          |
| <b>Viviana Rosati</b>   | A.U.O. Policlinico<br>Umberto I                                                                                                     | Società Italiana di Riabilitazione<br>Neurologica (SIRN)                                                                                                                 | none                          |
| <b>Enrico Marinelli</b> | Department of<br>Anatomical,<br>Histological, Forensic,<br>and Orthopedic<br>Sciences, "Sapienza"<br>University of Rome             | Società Italiana di Medicina Legale e<br>delle Assicurazioni (SIMLA) -<br>Dipartimento di Scienze Biotechologiche<br>e Medico-chirurgiche Università di Roma<br>Sapienza | none                          |
| <b>Bianca Masturzo</b>  | Obstetrics and<br>Gynecology<br>department. Ospedale<br>degli infermi.<br>Ponderano (Biella)                                        | Associazione degli Ostetrici e Ginecologi<br>Ospedalieri Italiani (AOGOI)                                                                                                | none                          |
| <b>Mauro Roselli</b>    | ASL CittadiTorino-<br>Ospedale Martini-S.C.<br>Ortopedia e<br>Traumatologia                                                         | Ortopedici Traumatologi Ospedalieri<br>d'Italia (OTODI)                                                                                                                  | none                          |
| <b>Stefano Vercelli</b> | Laboratorio di Ricerca<br>in Riabilitazione 2rLab,<br>Dipartimento<br>Economia Aziendale,<br>Sanità e Sociale.<br>SUPSI. Manno (CH) | Federazione Italiana delle Associazione<br>Scientifiche di Fisioterapia (FIASF)                                                                                          | none                          |
| <b>Gianmarco Rea</b>    | Asl Latina, 04100<br>Latina, Italy                                                                                                  | Società Italiana di Medicina Generale e<br>delle Cure Primarie (SIMG)                                                                                                    | none                          |

|                            |                                                                                                               |                                                                                    |      |
|----------------------------|---------------------------------------------------------------------------------------------------------------|------------------------------------------------------------------------------------|------|
| <b>Gianfranco Lamberti</b> | Dipartimento Medicina<br>Riabilitativa AUSL<br>Piacenza                                                       | Società Italiana di Urodinamica (SIUD)                                             | none |
| <b>Roberto Bortolotti</b>  | UO Reumatologia<br>Ospedale S.Chiera,<br>Trento                                                               | Società Italiana di Reumatologia (SIR)                                             | none |
| <b>Chiara Torresetti</b>   | Paideia International<br>Hospital                                                                             | Associazione Italiana di Urologia<br>Ginecologia e del Pavimento Pelvico<br>(AIUG) | none |
| <b>Fabio Bandini</b>       | Department of<br>Neurology, ASL 3<br>Genovese, Genova,<br>Italy                                               | Società Italiana Neurologia (SIN)                                                  | none |
| <b>Giuseppe Botta</b>      | Istituto Fisioterapico<br>Michelangelo di<br>Arezzo                                                           | Società Italiana di Flebolinfologia (SIFL)                                         | none |
| <b>Giancarlo Tancredi</b>  | Pediatric Department.<br>Sapienza Università di<br>Roma                                                       | Società Italiana di Pediatria (SIP)                                                | none |
| <b>Luigi Nappi</b>         | Department of Medical<br>and Surgical Sciences<br>Policlinico Riuniti di<br>Foggia<br>UNIVERSITY OF<br>FOGGIA | Società Italiana Di Ginecologia E<br>Ostetricia (SIGO)                             | none |
| <b>Marco Scorcu</b>        | Servizio di Medicina<br>dello Sport e<br>dell'Esercizio Fisico,<br>Cagliari, ATS                              | Federazione Medico Sportiva Italiana<br>(FMSI)                                     | none |

|                           |                                                                                                                                       |                                                               |      |
|---------------------------|---------------------------------------------------------------------------------------------------------------------------------------|---------------------------------------------------------------|------|
|                           | Sardegna, Cagliari,<br>Italy                                                                                                          |                                                               |      |
| <b>Monica Pierattelli</b> | Presidente SICuPP<br>Toscana, Pediatra di<br>libera scelta Campi<br>Bisenzio (FI)                                                     | Societa' Italiana Delle Cure Primarie<br>Pediatriche (SICuPP) | none |
| <b>Carla Berliri</b>      | Cittadinanzattiva- APS<br>- Sede Nazionale -Staff<br>area Salute - Tribunale<br>per i Diritti del Malato<br>- Politiche della Salute- | Cittadinanzattiva - APS                                       | none |

### Supplementary File 4. Panel of experts comments

| ROUND   | Electrical Stimulation                                                                                                                                                                                                                                                                                         | Neuromodulation, antalgic and interferential electrical currents                                                                                                                                                                                                                | Extracorporeal shock wave therapy                                                                                                                                                                                                                                                                                                                                                                                                                                                                                 | Laser therapy                                                                                                                                   | Electromagnetic therapy                                                                                                                                                                                                                                                                                                                                                      | Diathermy                                                                                                                                                                                                                                                                                                                                                                                                                                                                                                | Hot thermal agent modalities                                                                                                                  | Cryotherapy                                                                                                                                                                                                                                                                                                                                                                                                                         | Ultrasound                                       |
|---------|----------------------------------------------------------------------------------------------------------------------------------------------------------------------------------------------------------------------------------------------------------------------------------------------------------------|---------------------------------------------------------------------------------------------------------------------------------------------------------------------------------------------------------------------------------------------------------------------------------|-------------------------------------------------------------------------------------------------------------------------------------------------------------------------------------------------------------------------------------------------------------------------------------------------------------------------------------------------------------------------------------------------------------------------------------------------------------------------------------------------------------------|-------------------------------------------------------------------------------------------------------------------------------------------------|------------------------------------------------------------------------------------------------------------------------------------------------------------------------------------------------------------------------------------------------------------------------------------------------------------------------------------------------------------------------------|----------------------------------------------------------------------------------------------------------------------------------------------------------------------------------------------------------------------------------------------------------------------------------------------------------------------------------------------------------------------------------------------------------------------------------------------------------------------------------------------------------|-----------------------------------------------------------------------------------------------------------------------------------------------|-------------------------------------------------------------------------------------------------------------------------------------------------------------------------------------------------------------------------------------------------------------------------------------------------------------------------------------------------------------------------------------------------------------------------------------|--------------------------------------------------|
| Round 1 | My Likert Scale rating of 9 stems not only from the numerous evidence but also from the results of my clinical experience. In cases of perineal hypotonia and sphincter deficits, electrical stimulation has facilitated recovery times by enhancing manual work and proprioception during the learning phase. | The primary application of TTNS in my practice, aside from addressing bladder disorders (overactivity), is in the management of painful syndromes, such as spasms of peri-urethral muscles in patients with recurrent post-coital cystitis, vulvodynia, and pudendal neuralgia. | In this case, my assessment requires specificity: In many instances, women experiencing resistant pelvic pain may not readily accept the use of shock waves, as it is an impactful therapy that can cause initial discomfort. Among various instrumental approaches for this patient group, it would not be my first choice. On the other hand, my perspective on shock waves for the treatment of male pelvic pain or erectile dysfunction is quite different; in this case, I positively endorse the statement. | completely agree.                                                                                                                               | I cannot provide a judgment as I lack the appropriate training and experience in its use.                                                                                                                                                                                                                                                                                    | Thanks to the use of diathermy, I can achieve excellent results in the treatment of dermatological conditions affecting the genital mucosa, such as Lichen Sclerosus. In pelvic pain, patients appreciate the mild heat generated by the diathermy probe, allowing for more effective therapy in the area. Currently, this treatment is consistently integrated into all treatment plans, irrespective of individual clinical situations, without causing discomfort or triggering sensitivity reactions | Limited experience in menstrual pain for just the efficacy. However it is related to other type of hot thermal agents (e.g, infrared therapy) | Agreed, but the patient must be adequately instructed in advance on the use and timing of cryotherapy, for example, ice packs postpartum or in inflammatory hemorrhoidal syndromes. Discourage self ice application, and encourage the use of devices designed for healthcare purposes. It is a very useful and easily administered therapy but potentially 'dangerous' if mishandled at home, for instance, the risk of cold burns | For my expertise US is safe in pelvic disorders. |
|         | In the absence of expertise in the pelvic-perineal and neurological domains, the opinion is limited to the musculoskeletal field                                                                                                                                                                               | In the absence of expertise in the pelvic-perineal and neurological domains, the opinion is limited to the musculoskeletal context only.                                                                                                                                        | Shock waves are not recommended in individuals during the developmental age since their tissues and cartilage are still in the developmental phase                                                                                                                                                                                                                                                                                                                                                                | In the absence of expertise in pelvic-perineal, lymphatic, and neurological domains, the opinion is limited to the musculoskeletal context only | In the absence of expertise in pelvic-perineal areas, the opinion is confined to the musculoskeletal context only. The indicated median score pertains to uncertainty regarding the safety of persistent use (long term), as I am not aware of literature data on adverse events for such durations. For treatment cycles falling within the time frames investigated in the | In the absence of expertise in the pelvic-perineal domain, the opinion is confined to the musculoskeletal context only. The moderate agreement with the safety statement primarily concerns uncertainties regarding the operator's safety with high daily exposure to the equipment, especially if potential risk factors are present (e.g., pregnancy or                                                                                                                                                | In my experience, I have observed several cases of mild and transient skin irritations.                                                       | It is the only treatment I have seen used in younger age groups                                                                                                                                                                                                                                                                                                                                                                     | For my expertise US is safe in pelvic disorders. |

|         |                                                                                                                                                                                                                                                                                                                           |                                                          |                                                      |                                                                |                                                                                             |                                                                                                                                                                                                                                                                                                                        |                                                                                                                                               |                                                                                                                                                                                                           |                                                         |
|---------|---------------------------------------------------------------------------------------------------------------------------------------------------------------------------------------------------------------------------------------------------------------------------------------------------------------------------|----------------------------------------------------------|------------------------------------------------------|----------------------------------------------------------------|---------------------------------------------------------------------------------------------|------------------------------------------------------------------------------------------------------------------------------------------------------------------------------------------------------------------------------------------------------------------------------------------------------------------------|-----------------------------------------------------------------------------------------------------------------------------------------------|-----------------------------------------------------------------------------------------------------------------------------------------------------------------------------------------------------------|---------------------------------------------------------|
|         |                                                                                                                                                                                                                                                                                                                           |                                                          |                                                      |                                                                | available RCTs, the judgment is certain                                                     | the presence of oncological pathologies, even if unrecognized). I am not aware of studies monitoring the health of operators exposed to moderate or high levels of possible electromagnetic fields generated by the equipment. Regarding the equipment's safety for the patient, the judgment of agreement is certain. |                                                                                                                                               |                                                                                                                                                                                                           |                                                         |
|         | NMES is widely used to address certain types of pharyngeal dysfunction in adults with dysphagia, but there is limited evidence demonstrating its effectiveness or appropriateness for pediatric patients. Reference: Andreoli S et al. Int J Pediatr Otorhinolaryngol 2019;127:109646. doi: 10.1016/j.ijporl.2019.109646. | NA in some pelvi-perineal and neurological disorders     | NA in some pelvi-perineal and neurological disorders | Adulthood or in individuals with skeletal maturity             | PEMF therapy is not recommended for children who have not yet completed their growth phases | It is not recommended for children as their biological tissues are still in the growth phase                                                                                                                                                                                                                           | I suggest emphasizing more strongly that the use is specifically intended for non-acute arthropathies                                         | Risk of cold burn                                                                                                                                                                                         | Rarely used in adolescents after sports-related traumas |
|         | NA in some perineal neurological disorders                                                                                                                                                                                                                                                                                | For my experience mainly for neurological disorders      |                                                      | NA in some neurological and perineal disorders                 | NA for some perineal disorders                                                              | NA for some perineal disorders                                                                                                                                                                                                                                                                                         | for my expertise, uncertain in groin pain                                                                                                     |                                                                                                                                                                                                           |                                                         |
|         | For my expertise mainly in migraine                                                                                                                                                                                                                                                                                       |                                                          |                                                      | LLLT expertise in some neurological conditions (e.g, migraine) | for my expertise mainly used in migraine                                                    |                                                                                                                                                                                                                                                                                                                        |                                                                                                                                               |                                                                                                                                                                                                           |                                                         |
| Round 2 | Limited in some neurological setting                                                                                                                                                                                                                                                                                      | Useful also for vulvodynia, rectal spasms with anal pain | Uncertainty in some neurological disorders           | limited evidence in some neurological disorders                |                                                                                             | I additionally include post-genital ulcer treatment, hypertonicity, and genital swelling in patients with pelvic pain                                                                                                                                                                                                  | Limited experience in menstrual pain for just the efficacy. However it is related to other type of hot thermal agents (e.g, infrared therapy) | Cryotherapy in pelvic floor rehabilitation is used for the treatment of pain from hemorrhoidal inflammation, postpartum contusion, postpartum hypotonia with pronounced laxity, and for some patients, it | For my expertise US is safe in pelvic disorders.        |

1  
2  
3  
4  
5  
6  
7  
8  
9  
10  
11  
12  
13  
14  
15  
16  
17  
18  
19  
20  
21  
22  
23  
24  
25  
26  
27  
28  
29  
30  
31  
32  
33  
34  
35  
36  
37  
38  
39  
40  
41  
42  
43  
44  
45  
46

1  
2  
3  
4  
5  
6  
7  
8  
9  
10  
11  
12  
13  
14  
15  
16  
17  
18  
19  
20  
21  
22  
23  
24  
25  
26  
27  
28  
29  
30  
31  
32  
33  
34  
35  
36  
37  
38  
39  
40  
41  
42  
43  
44  
45  
46

|  |  |  |  |                                                                                                                                                                                                                                                                                                                                                                                                                                                              |  |  |  |  |                                                                                      |
|--|--|--|--|--------------------------------------------------------------------------------------------------------------------------------------------------------------------------------------------------------------------------------------------------------------------------------------------------------------------------------------------------------------------------------------------------------------------------------------------------------------|--|--|--|--|--------------------------------------------------------------------------------------|
|  |  |  |  |                                                                                                                                                                                                                                                                                                                                                                                                                                                              |  |  |  |  | is beneficial in addressing the sensation of genital swelling in chronic pelvic pain |
|  |  |  |  | I do not have the right clinical experience to rate it with confidence. In my clinical practice, patients who have undergone LLLT have shown a greater tendency towards increased genital dryness. Therefore, the treatment requires additional measures such as enhanced hydration, for example, through the use of serums/ointments/suppositories during the treatment period, to mitigate certain side effects that may cause discomfort to the patients. |  |  |  |  |                                                                                      |

For peer review only

## REFERENCES

1. Regolamento generale sulla protezione dei dati. Regolamento (UE) 2016/679 del Parlamento europeo e del Consiglio del 27 aprile 2016. Available at <https://www.garanteprivacy.it/documents/10160/0/Regolamento+UE+2016+679.+Arricchito+con+riferimenti+ai+Considerando+Aggiornato+alle+rettifiche+pubblicate+sulla+Gazzetta+Ufficiale++dell%27Unione+europea+127+del+23+maggio+2018>.
2. [https://ec.europa.eu/justice/article-29/documentation/opinion-recommendation/files/2014/wp216\\_en.pdf](https://ec.europa.eu/justice/article-29/documentation/opinion-recommendation/files/2014/wp216_en.pdf).
3. [https://commission.europa.eu/sites/default/files/5\\_h2020\\_ethics\\_and\\_data\\_protection\\_0.pdf](https://commission.europa.eu/sites/default/files/5_h2020_ethics_and_data_protection_0.pdf).
4. Bellew JW. Foundations of Clinical Electrotherapy. In: Bellew JW, Michlovitz SL, Nolan Jr TP, eds. Modalities for Therapeutic Intervention, 6e. New York, NY: McGraw-Hill Education 2016.
5. Lake DA. Neuromuscular electrical stimulation. An overview and its application in the treatment of sports injuries. *Sports Med* 1992;13(5):320-36. doi: 10.2165/00007256-199213050-00003 [published Online First: 1992/05/01]
6. Martin R, Sadowsky C, Obst K, et al. Functional electrical stimulation in spinal cord injury:: from theory to practice. *Top Spinal Cord Inj Rehabil* 2012;18(1):28-33. doi: 10.1310/sci1801-28 [published Online First: 2012/01/01]
7. Jones I, Johnson MI. Transcutaneous electrical nerve stimulation. *Continuing Education in Anaesthesia Critical Care & Pain* 2009;9(4):130-35. doi: 10.1093/bjaceaccp/mkp021
8. Mallmann S, Ferla L, Rodrigues MP, et al. Comparison of parasacral transcutaneous electrical stimulation and transcutaneous posterior tibial nerve stimulation in women with overactive bladder syndrome: A randomized clinical trial. *Eur J Obstet Gynecol Reprod Biol* 2020;250:203-08. doi: 10.1016/j.ejogrb.2020.05.005 [published Online First: 2020/05/29]
9. Beatti A, Rayner A, Souvlis T, et al. The analgesic effect of interferential therapy on clinical and experimentally induced pain. *Physical Therapy Reviews* 2010;15(4):243-52. doi: 10.1179/174328810X12647087218992
10. Ingber DE. Mechanobiology and diseases of mechanotransduction. *Ann Med* 2003;35(8):564-77. doi: 10.1080/07853890310016333 [published Online First: 2004/01/08]
11. T. Watson e E. L. Nussbaum, Electrophysical Agents. Evidence-based Practice. 13th Edition, Amsterdam, The Netherlands: Elsevier Health Sciences, 2021.
12. Surace SJ, Deitch J, Johnston RV, et al. Shock wave therapy for rotator cuff disease with or without calcification. *Cochrane Database of Systematic Reviews* 2020(3) doi: 10.1002/14651858.CD008962.pub2
13. Kim EK, Kwak KI. Effect of extracorporeal shock wave therapy on the shoulder joint functional status of patients with calcific tendinitis. *J Phys Ther Sci* 2016;28(9):2522-24. doi: 10.1589/jpts.28.2522 [published Online First: 2016/11/02]
14. Cacchio A, Paoloni M, Barile A, et al. Effectiveness of radial shock-wave therapy for calcific tendinitis of the shoulder: single-blind, randomized clinical study. *Phys Ther* 2006;86(5):672-82. [published Online First: 2006/05/03]
15. Bjordal JM, Lopes-Martins RAB, Joensen J, et al. The anti-inflammatory mechanism of low level laser therapy and its relevance for clinical use in physiotherapy. *Physical Therapy Reviews* 2010;15(4):286-93. doi: 10.1179/1743288X10Y.0000000001
16. Bjordal JM, Johnson MI, Iversen V, et al. Low-level laser therapy in acute pain: a systematic review of possible mechanisms of action and clinical effects in randomized placebo-controlled trials. *Photomed Laser Surg* 2006;24(2):158-68. doi: 10.1089/pho.2006.24.158 [published Online First: 2006/05/19]
17. Song HJ, Seo HJ, Lee Y, et al. Effectiveness of high-intensity laser therapy in the treatment of musculoskeletal disorders: A systematic review and meta-analysis of randomized controlled

1  
2  
3  
4  
5  
6  
7  
8  
9  
10  
11  
12  
13  
14  
15  
16  
17  
18  
19  
20  
21  
22  
23  
24  
25  
26  
27  
28  
29  
30  
31  
32  
33  
34  
35  
36  
37  
38  
39  
40  
41  
42  
43  
44  
45  
46  
47  
48  
49  
50  
51  
52  
53  
54  
55  
56  
57  
58  
59  
60

- trials. *Medicine (Baltimore)* 2018;97(51):e13126. doi: 10.1097/md.00000000000013126 [published Online First: 2018/12/24]
18. Paolucci T, Pezzi L, Centra AM, et al. Electromagnetic Field Therapy: A Rehabilitative Perspective in the Management of Musculoskeletal Pain - A Systematic Review. *J Pain Res* 2020;13:1385-400. doi: 10.2147/jpr.S231778 [published Online First: 2020/07/02]
19. Gordon GA. Designed electromagnetic pulsed therapy: clinical applications. *J Cell Physiol* 2007;212(3):579-82. doi: 10.1002/jcp.21025 [published Online First: 2007/06/20]
20. Smania N, Corato E, Fiaschi A, et al. Repetitive magnetic stimulation: a novel therapeutic approach for myofascial pain syndrome. *J Neurol* 2005;252(3):307-14. doi: 10.1007/s00415-005-0642-1 [published Online First: 2005/02/24]
21. Laufer Y, Dar G. Effectiveness of thermal and athermal short-wave diathermy for the management of knee osteoarthritis: a systematic review and meta-analysis. *Osteoarthritis Cartilage* 2012;20(9):957-66. doi: 10.1016/j.joca.2012.05.005 [published Online First: 2012/06/05]
22. Allen RJ. Physical agents used in the management of chronic pain by physical therapists. *Phys Med Rehabil Clin N Am* 2006;17(2):315-45. doi: 10.1016/j.pmr.2005.12.007 [published Online First: 2006/04/18]
23. Shields N, Gormley J, O'Hare N. Short-Wave Diathermy: A Review of Existing Clinical Trials. *Physical Therapy Reviews* 2001;6(2):101-18. doi: 10.1179/ptr.2001.6.2.101
24. Goats GC. Physiotherapy Treatment Modalities -Microwave diathermy. *Br. J. Sp. Med.* 2012; 24: 212–218.
25. Wang Y, Lu H, Li S, et al. Effect of cold and heat therapies on pain relief in patients with delayed onset muscle soreness: A network meta-analysis. *J Rehabil Med* 2022;54:jrm00258. doi: 10.2340/jrm.v53.331 [published Online First: 2021/10/13]
26. Petrofsky JS, Khowailed IA, Lee H, et al. Cold Vs. Heat After Exercise-Is There a Clear Winner for Muscle Soreness. *J Strength Cond Res* 2015;29(11):3245-52. doi: 10.1519/jsc.0000000000001127 [published Online First: 2015/10/27]
27. Guilhem G, Hug F, Couturier A, et al. Effects of air-pulsed cryotherapy on neuromuscular recovery subsequent to exercise-induced muscle damage. *Am J Sports Med* 2013;41(8):1942-51. doi: 10.1177/0363546513490648 [published Online First: 2013/06/07]
28. Watson T. Ultrasound in contemporary physiotherapy practice. *Ultrasonics* 2008;48(4):321-9. doi: 10.1016/j.ultras.2008.02.004 [published Online First: 2008/05/10]
29. O'Brien WD, Jr. Ultrasound-biophysics mechanisms. *Prog Biophys Mol Biol* 2007;93(1-3):212-55. doi: 10.1016/j.pbiomolbio.2006.07.010 [published Online First: 2006/08/29]



**CREDES Checklist:****Recommendations for the Conducting and REporting of DElphi Studies (CREDES)[1]**

| Items of reporting                                                                                                                                                                                                                                                                                                                                                                                                                                                                                                                                                                                                                                                                                                                                                                                                                                                                       | Reported on page           |
|------------------------------------------------------------------------------------------------------------------------------------------------------------------------------------------------------------------------------------------------------------------------------------------------------------------------------------------------------------------------------------------------------------------------------------------------------------------------------------------------------------------------------------------------------------------------------------------------------------------------------------------------------------------------------------------------------------------------------------------------------------------------------------------------------------------------------------------------------------------------------------------|----------------------------|
| <i>Purpose and rationale.</i> The purpose of the study should be clearly defined and demonstrate the appropriateness of the use of the Delphi technique as a method to achieve the research aim. A rationale for the choice of the Delphi technique as the most suitable method needs to be provided.                                                                                                                                                                                                                                                                                                                                                                                                                                                                                                                                                                                    | 5 - 6                      |
| <i>Expert panel.</i> Criteria for the selection of experts and transparent information on recruitment of the expert panel, sociodemographic details including information on expertise regarding the topic in question, (non)response and response rates over the ongoing iterations should be reported.                                                                                                                                                                                                                                                                                                                                                                                                                                                                                                                                                                                 | 7                          |
| <i>Description of the methods.</i> The methods employed need to be comprehensible; this includes information on preparatory steps (How was available evidence on the topic in question synthesised?), piloting of material and survey instruments, design of the survey instrument(s), the number and design of survey rounds, methods of data analysis, processing and synthesis of experts' responses to inform the subsequent survey round and methodological decisions taken by the research team throughout the process.                                                                                                                                                                                                                                                                                                                                                            | 7-10                       |
| <i>Procedure.</i> Flow chart to illustrate the stages of the Delphi process, including a preparatory phase, the actual 'Delphi rounds', interim steps of data processing and analysis, and concluding steps.                                                                                                                                                                                                                                                                                                                                                                                                                                                                                                                                                                                                                                                                             | 6-9; Figure 1-2            |
| <i>Definition and attainment of consensus.</i> It needs to be comprehensible to the reader how consensus was achieved throughout the process, including strategies to deal with non-consensus.                                                                                                                                                                                                                                                                                                                                                                                                                                                                                                                                                                                                                                                                                           | 9-10                       |
| <i>Results.</i> Reporting of results for each round separately is highly advisable in order to make the evolving of consensus over the rounds transparent. This includes figures showing the average group response, changes between rounds, as well as any modifications of the survey instrument such as deletion, addition or modification of survey items based on previous rounds.                                                                                                                                                                                                                                                                                                                                                                                                                                                                                                  | 10-12; Table 2; Appendix 2 |
| <i>Discussion of limitations.</i> Reporting should include a critical reflection of potential limitations and their impact of the resulting guidance.                                                                                                                                                                                                                                                                                                                                                                                                                                                                                                                                                                                                                                                                                                                                    | 15-16                      |
| <i>Adequacy of conclusions.</i> The conclusions should adequately reflect the outcomes of the Delphi study with a view to the scope and applicability of the resulting practice guidance.                                                                                                                                                                                                                                                                                                                                                                                                                                                                                                                                                                                                                                                                                                | 16                         |
| <i>Publication and dissemination.</i> The resulting guidance on good practice in palliative care should be clearly identifiable from the publication, including recommendations for transfer into practice and implementation. If the publication does not allow for a detailed presentation of either the resulting practice guidance or the methodological features of the applied Delphi technique, or both, reference to a more detailed presentation elsewhere should be made (e.g. availability of the full guideline from the authors or online; publication of a separate paper reporting on methodological details and particularities of the process (e.g. persistent disagreement and controversy on certain issues)). A dissemination plan should include endorsement of the guidance by professional associations and health care authorities to facilitate implementation. | 13-14                      |

1. Jünger S, Payne SA, Brine J, Radbruch L, Brearley SG. Guidance on Conducting and REporting DElphi Studies (CREDES) in palliative care: Recommendations based on a methodological systematic review. *Palliat Med.* 2017;31: 684–706. doi:10.1177/0269216317690685

# BMJ Open

## Evidence-informed and consensus-based statements about SAFETY of Physical Agent Modalities Practice in physiotherapy and rehabilitation medicine (SAFE PAMP): a national Delphi of healthcare scientific societies

|                                 |                                                                                                                                                                                                                                                                                                                                                                                                                                                                                                                                                                                                                                                                                                                                                                                                                                                                                                                                                                                                                                                                                                                                                            |
|---------------------------------|------------------------------------------------------------------------------------------------------------------------------------------------------------------------------------------------------------------------------------------------------------------------------------------------------------------------------------------------------------------------------------------------------------------------------------------------------------------------------------------------------------------------------------------------------------------------------------------------------------------------------------------------------------------------------------------------------------------------------------------------------------------------------------------------------------------------------------------------------------------------------------------------------------------------------------------------------------------------------------------------------------------------------------------------------------------------------------------------------------------------------------------------------------|
| Journal:                        | <i>BMJ Open</i>                                                                                                                                                                                                                                                                                                                                                                                                                                                                                                                                                                                                                                                                                                                                                                                                                                                                                                                                                                                                                                                                                                                                            |
| Manuscript ID                   | bmjopen-2023-075348.R3                                                                                                                                                                                                                                                                                                                                                                                                                                                                                                                                                                                                                                                                                                                                                                                                                                                                                                                                                                                                                                                                                                                                     |
| Article Type:                   | Original research                                                                                                                                                                                                                                                                                                                                                                                                                                                                                                                                                                                                                                                                                                                                                                                                                                                                                                                                                                                                                                                                                                                                          |
| Date Submitted by the Author:   | 01-Mar-2024                                                                                                                                                                                                                                                                                                                                                                                                                                                                                                                                                                                                                                                                                                                                                                                                                                                                                                                                                                                                                                                                                                                                                |
| Complete List of Authors:       | Gianola, Silvia; IRCCS Galeazzi Orthopaedic Institute, Unit of Clinical Epidemiology<br>Bargeri, Silvia; IRCCS Galeazzi Orthopaedic Institute, Unit of Clinical Epidemiology<br>Pellicciari, Leonardo; IRCCS Istituto Delle Scienze Neurologiche di Bologna<br>Gambazza, Simone; Fondazione IRCCS Ca' Granda Ospedale Maggiore Policlinico<br>Rossettini, Giacomo; Università degli Studi di Verona, School of Physiotherapy; University of Rome La Sapienza, Department of Human Neurosciences<br>Fulvio, Anna; Associazione Italiana di Fisioterapia<br>Genovese, Vincenzo; Associazione Italiana di Fisioterapia<br>Benedini, Matteo; Associazione Italiana di Fisioterapia<br>Proverbio, Emanuele; Associazione Italiana di Fisioterapia<br>Cecchetto, Simone; Associazione Italiana di Fisioterapia; Provincia autonoma di Trento Azienda Provinciale per i Servizi Sanitari<br>Castellini, Greta; IRCCS Istituto Ortopedico Galeazzi, Clinical Epidemiology Unit<br>Turolla, Andrea; Alma Mater Studiorum University of Bologna; IRCCS Policlinico Sant'Orsola-Malpighi<br>SAFE PAMP Collaborators, SAFE PAMP Collaborators; SAFE PAMP Collaborators |
| <b>Primary Subject Heading</b>: | Rehabilitation medicine                                                                                                                                                                                                                                                                                                                                                                                                                                                                                                                                                                                                                                                                                                                                                                                                                                                                                                                                                                                                                                                                                                                                    |
| Secondary Subject Heading:      | Rehabilitation medicine, Rheumatology, Sports and exercise medicine, Neurology, Urology                                                                                                                                                                                                                                                                                                                                                                                                                                                                                                                                                                                                                                                                                                                                                                                                                                                                                                                                                                                                                                                                    |
| Keywords:                       | Physical Therapy Modalities, REHABILITATION MEDICINE, Health & safety < HEALTH SERVICES ADMINISTRATION & MANAGEMENT, Musculoskeletal disorders < ORTHOPAEDIC & TRAUMA SURGERY, ORTHOPAEDIC & TRAUMA SURGERY, NEUROLOGY                                                                                                                                                                                                                                                                                                                                                                                                                                                                                                                                                                                                                                                                                                                                                                                                                                                                                                                                     |
|                                 |                                                                                                                                                                                                                                                                                                                                                                                                                                                                                                                                                                                                                                                                                                                                                                                                                                                                                                                                                                                                                                                                                                                                                            |

1  
2  
3  
4  
5  
6  
7  
8  
9  
10  
11  
12  
13  
14  
15  
16  
17  
18  
19  
20  
21  
22  
23  
24  
25  
26  
27  
28  
29  
30  
31  
32  
33  
34  
35  
36  
37  
38  
39  
40  
41  
42  
43  
44  
45  
46  
47  
48  
49  
50  
51  
52  
53  
54  
55  
56  
57  
58  
59  
60





I, the Submitting Author has the right to grant and does grant on behalf of all authors of the Work (as defined in the below author licence), an exclusive licence and/or a non-exclusive licence for contributions from authors who are: i) UK Crown employees; ii) where BMJ has agreed a CC-BY licence shall apply, and/or iii) in accordance with the terms applicable for US Federal Government officers or employees acting as part of their official duties; on a worldwide, perpetual, irrevocable, royalty-free basis to BMJ Publishing Group Ltd ("BMJ") its licensees and where the relevant Journal is co-owned by BMJ to the co-owners of the Journal, to publish the Work in this journal and any other BMJ products and to exploit all rights, as set out in our [licence](#).

The Submitting Author accepts and understands that any supply made under these terms is made by BMJ to the Submitting Author unless you are acting as an employee on behalf of your employer or a postgraduate student of an affiliated institution which is paying any applicable article publishing charge ("APC") for Open Access articles. Where the Submitting Author wishes to make the Work available on an Open Access basis (and intends to pay the relevant APC), the terms of reuse of such Open Access shall be governed by a Creative Commons licence – details of these licences and which [Creative Commons](#) licence will apply to this Work are set out in our licence referred to above.

Other than as permitted in any relevant BMJ Author's Self Archiving Policies, I confirm this Work has not been accepted for publication elsewhere, is not being considered for publication elsewhere and does not duplicate material already published. I confirm all authors consent to publication of this Work and authorise the granting of this licence.

1  
2  
3 1 **Evidence-informed and consensus-based statements about SAFETY of Physical**  
4  
5  
6 2 **Agent Modalities Practice in physiotherapy and rehabilitation medicine (SAFE**  
7  
8 3 **PAMP): a national Delphi of healthcare scientific societies**  
9  
10

11 4  
12  
13 5 ***Authors List***  
14

15 6 *Silvia Gianola<sup>1</sup>, Silvia Bargerì<sup>1</sup>, Leonardo Pellicciari<sup>2</sup>, Simone Gambazza<sup>3</sup>, Giacomo Rossetini<sup>4,5,6</sup>, Anna*  
16  
17 7 *Fulvio<sup>7</sup>, Vincenzo Genovese<sup>7</sup>, Matteo Benedini<sup>7</sup>, Emanuele Proverbio<sup>7</sup>, Simone Cecchetto<sup>7,8</sup>, Greta*  
18  
19 8 *Castellini<sup>1\*</sup>, Andrea Turolla<sup>9,10</sup> and SAFE PAMP Collaborators*  
20  
21

- 22 9  
23  
24  
25 10 1. IRCCS Istituto Ortopedico Galeazzi, Unit of Clinical Epidemiology, Milan, Italy  
26  
27 11 2. IRCCS Istituto delle Scienze Neurologiche di Bologna, Bologna, Italy  
28  
29 12 3. Healthcare Professions Department, Fondazione IRCCS Ca' Granda Ospedale Maggiore Policlinico,  
30  
31 13 Milan, Italy  
32  
33 14 4. School of Physiotherapy, University of Verona, Verona, Italy  
34  
35 15 5. Department of Human Neurosciences, University of Roma "Sapienza Roma", Rome, Italy  
36  
37 16 6. Department of Physiotherapy, Faculty of Sport Sciences, Universidad Europea de Madrid, Calle  
38  
39 17 Tajo s/n, Villaviciosa de Odón 28670, Spain  
40  
41 18 7. Associazione Italiana di Fisioterapia (AIFI), Rome, Italy  
42  
43 19 8. Direction of Health Professions, APSS, 38014 Trento, Italy.  
44  
45 20 9. Department of Biomedical and Neuromotor Sciences-DIBINEM, Alma Mater Studiorum Università  
46  
47 21 di Bologna, 40138 Bologna, Italy.  
48  
49 22 10. Unit of Occupational Medicine, IRCCS Azienda Ospedaliero-Universitaria di Bologna, Bologna, Italy  
50  
51  
52

53 23 Corresponding author:

54 24 Silvia Bargerì

55 25 IRCCS Istituto Ortopedico Galeazzi, Unit of Clinical Epidemiology, Milan, Italy

56 26 [silvia.bargerì@grupposandonato.it](mailto:silvia.bargerì@grupposandonato.it)  
57  
58  
59  
60

1  
2  
3 27 \*co-last  
4  
5

6 28 **SAFE PAMP Collaborators**  
7

8 29 *Chiara Torresetti, on behalf of AIUG (Associazione Italiana di Urologia Ginecologia e del Pavimento Pelvico)*  
9

10 30 *Bianca Masturzo, on behalf of AOGOI (Associazione Ostetrici Ginecologi Ospedalieri Italiani)*  
11

12 31 *Carla Berliri, on behalf of Cittadinanzattiva Associazione di Promozione Socialez*  
13

14 32 *Mauro Roselli, on behalf of OTODI (Ortopedici e Traumatologi Ospedalieri D'Italia)*  
15

16 33 *Stefano Vercelli, on behalf of FIASF (Federazione Italiana delle Associazioni Scientifiche di Fisioterapia)*  
17

18 34 *Marco Scorcu, on behalf of FMSI (Federazione Medico Sportiva Italiana)*  
19

20 35 *Giuseppe Botta, on behalf of SIFL (Società Italiana di Flebologia)*  
21

22 36 *Luigi Nappi, on behalf of SIGO (Società Italiana Di Ginecologia E Ostetricia)*  
23

24 37 *Gianmarco Rea, on behalf of SIMG (Società Italiana di Medicina Generale e delle cure primarie)*  
25

26 38 *Enrico Marinelli, on behalf of SIMLA (Società Italiana di Medicina Legale e delle Assicurazioni)*  
27

28 39 *Fabio Bandini, on behalf of SIN (Società Italiana di Neurologia)*  
29

30 40 *Roberto Bortolotti, on behalf of SIR (Società Italiana di Reumatologia)*  
31

32 41 *Viviana Rosati, on behalf of SIRN (Società Italiana di Riabilitazione Neurologica)*  
33

34 42 *Armando Perrotta, on behalf of SISC (Società Italiana per lo Studio delle Cefalee)*  
35

36 43 *Gianfranco Lamberti, on behalf of SIUD (Società Italiana di Urodinamica)*  
37

38 44 *Monica Pierattelli, on behalf of SICuPP (Società Italiana Delle Cure Primarie Pediatriche)*  
39

40 45 *Giancarlo Tancredi, on behalf of SIP (Società Italiana di Pediatria).*  
41  
42  
43  
44  
45  
46  
47  
48  
49  
50  
51  
52  
53  
54  
55  
56  
57  
58  
59  
60

1  
2  
3 **46 ABSTRACT: 280 words**  
4

5 **47 Objective:** A shared consensus on the safety about Physical Agent Modalities (PAMs) practice in  
6  
7  
8 **48** physiotherapy and rehabilitation is lacking. We aimed to develop evidence-informed and consensus-  
9  
10 **49** based statements about the safety of PAMs.  
11

12 **50 Study design and setting:** A RAND-modified Delphi Rounds' survey was used to reach a consensus.  
13  
14 **51** We established a steering committee of the Italian Association of Physiotherapy (Associazione  
15  
16  
17 **52** Italiana di Fisioterapia - AIFI) to identify areas and questions for developing statements about the  
18  
19 **53** safety of the most commonly used PAMs in physiotherapy and rehabilitation. We invited 28 National  
20  
21 **54** Scientific and Technical Societies, including forensics and lay members, as a multidisciplinary and  
22  
23  
24 **55** multi-professional panel of experts to evaluate the nine proposed statements and formulate additional  
25  
26 **56** inputs. The level of agreement was measured using a 9-point Likert scale, with consensus in the  
27  
28 **57** Delphi Rounds was assessed using the rating proportion with a threshold of 75%.  
29

30 **58 Results:** Seventeen (61%) out of 28 Scientific and Technical Societies participated, involving their  
31  
32  
33 **59** most representative members. The panel of experts mainly consisted of clinicians (88%) with  
34  
35 **60** expertise in musculoskeletal (47%), pelvic floor (24%), neurological (18%) and lymphatic (6%)  
36  
37 **61** disorders with a median experience of 30 years (IQR=17-36). Two Delphi Rounds were necessary to  
38  
39  
40 **62** reach a consensus. The final approved criteria list comprised nine statements about the safety of nine  
41  
42 **63** PAMs (i.e., electrical stimulation neuromodulation, extracorporeal shock wave therapy, laser therapy,  
43  
44 **64** electromagnetic therapy, diathermy, hot thermal agents, cryotherapy and therapeutic ultrasound) in  
45  
46  
47 **65** adult patients with a general note about populations subgroups.  
48

49 **66 Conclusions:** The resulting consensus-based statements inform patients, healthcare professionals and  
50  
51 **67** policy-makers regarding the safe application of PAMs in physiotherapy and rehabilitation practice.  
52  
53  
54 **68** Future research is needed to extend this consensus on pediatric and frail populations, such as  
55  
56 **69** immunocompromised patients.  
57  
58  
59  
60

1  
2  
3 70 **Key Words:** Physical Therapy Modalities, Safety, Rehabilitation, Physical and Rehabilitation  
4  
5 71 Medicine, Delphi Technique, Orthopedics, Neurology, Pelvic Floor, Musculoskeletal System  
6  
7  
8

9 72 **STRENGTH AND LIMITATIONS**  
10  
11

- 12 73 • Starting from a recent scoping review of the literature, we aimed to acknowledge evidence-  
13 informed indications of rehabilitation for safe PAMs;  
14 74  
15 75 • Indications on the safety of physical agents (PAMs) were developed by a steering committee  
16 for different target conditions in physiotherapy and rehabilitation practice and supported by  
17 76 evidence and clinical expertise  
18 77  
19 78 • We strictly followed published guidelines for reporting and conduction, with a-priori publicly  
20 registered protocol to determine agreement within the Delphi process.  
21 79  
22 80 • The multi-professional and multidisciplinary panel of experts rated and revised the agreement  
23 of indications for safe PAMs rehabilitation in multiple rounds until reaching a consensus.  
24 81  
25 82 • Indications did not cover the clinical effectiveness of PAMs as well as specific subgroups for  
26 which evidence and expertise were not available.  
27 83  
28  
29  
30  
31  
32  
33  
34  
35  
36  
37  
38  
39  
40  
41  
42  
43  
44  
45  
46  
47  
48  
49  
50  
51  
52  
53  
54  
55  
56  
57  
58  
59  
60



1  
2  
3 84 **INTRODUCTION**

4 85  
5 86 Physical agent modalities (PAMs) are extensively applied in physiotherapy and rehabilitation practice  
6  
7  
8 87 by targeting tissues to reduce swelling, alleviate pain, enhance healing, and improve muscle tone.(1-  
9  
10 88 4) These treatments, recommended and administered by healthcare professionals across various  
11  
12 89 medical fields, are often integrated with other physiotherapy and rehabilitation interventions. (5)  
13  
14 90 However, ensuring the safety of these treatments is fundamental for both clinicians and patients.  
15  
16  
17 91 Previous consensus on contraindications and precautions associated with using PAMs from various  
18  
19 92 organizations were released in the early 2000s.(6-8) Still, they have become outdated in light of  
20  
21 93 technological advancements of the last years.(9, 10) A recent scoping review of the literature(5)  
22  
23 94 examined several systematic reviews on the safety of commonly used PAMs. This scoping review,  
24  
25 95 encompassing treatments such as cryotherapy, electrical stimulation, transcutaneous electrical nerve  
26  
27 96 stimulation, functional electrical stimulation, extracorporeal shockwave therapy, laser therapy,  
28  
29 97 magnetotherapy, pulsed electromagnetic field and diathermy, revealed no important harm associated  
30  
31 98 with their use. Nevertheless, it is worth noting that adverse events may be underreported in primary  
32  
33 99 studies(11, 12) highlighting the need to integrate expert experience to bridge the current gaps between  
34  
35 100 existing literature and clinical practice. Therefore, the purpose of the SAFETY of Physical Agent  
36  
37 101 Modalities Practice (SAFE PAMP) consensus in physiotherapy and rehabilitation is to develop  
38  
39 102 evidence-informed and expert consensus-based statements about the safety of PAMs through a  
40  
41 103 RAND Delphi procedure. Our goal is to make patients, healthcare professionals and policy-makers  
42  
43  
44  
45  
46 104 aware about the safe application of PAMs in physiotherapy and rehabilitation.  
47  
48  
49  
50  
51  
52  
53  
54  
55  
56  
57  
58  
59  
60

## METHODS

### Design

A RAND-modified Delphi Rounds survey process was employed as the facilitation technique for reaching expert consensus.(13, 14) The Delphi technique is primarily used when the available knowledge is incomplete or subject to uncertainty.(15) We followed the guidance on "Conducting and REporting of DELphi Studies" (CREDES).(16, 17) This project is exempted from ethical approval according to the "ethics and data protection" regulations of the European Commission.(18) More details are reported in **Supplementary File 1**. The protocol was *a-priori* registered on the Open Science Framework (OSF) online repository.(19)

The process consisted of four phases: (i) establishment of the steering committee and invitation of national scientific and technical societies to constitute the panel of experts; (ii) generation of statements using a comprehensive approach based on a published scoping review of existing systematic reviews on PAMs safety in physiotherapy and rehabilitation medicine(5) as well as on expertise from content experts of the steering committee; (iii) rating of statements from the panel of experts through a national Delphi survey aiming to identify, assess and modify statement importance for each field (e.g., musculoskeletal); (iv) an online workshop meeting to finalize the list of statements reaching the final consensus. Finally, we planned to disseminate the final statements list as good clinical practice (**Figure 1**).

[Figure 1]

### **Phase I. Establishment of the steering committee and panel of experts**

#### *Steering committee*

In June 2022, the project team nominated a steering committee responsible for defining the list of statements of safe PAMs, selecting national scientific and technical societies for expert participants, developing the Delphi questionnaires, and analyzing responses from participants after each round.

1  
2  
3 131 The steering committee involved 11 content experts from the Italian Association of Physiotherapy  
4  
5 132 (Associazione Italiana di Fisioterapia – AIFI), a member of the World Physiotherapy (20). AIFI is  
6  
7  
8 133 the scientific and technical society in Italy for the physiotherapy profession recognized by the Italian  
9  
10 134 Minister of Health to produce clinical practice guidelines in the field.(21, 22)

11  
12 135 To assure the external validity of the consensus process, the steering committee included two content  
13  
14  
15 136 experts on PAMs (MB, EP), three on rehabilitation of musculoskeletal disorders (GR, VG, SB), one  
16  
17 137 on neurological physiotherapy and neuroscience (AT), one on pelvic floor rehabilitation (AF), and  
18  
19 138 four methodologists (SGa, SGi, GC, LP).

20  
21  
22 139

#### 23 24 140 *Panel of experts*

25  
26 141 It is known that the diversity of a Delphi panel has an impact on the quality of the final  
27  
28  
29 142 recommendations. In contrast, no agreement on the panel size for Delphi studies exists. Panels of 20–  
30  
31 143 30 participants are common.(23, 24) Thus, the steering committee invited all the national  
32  
33 144 multidisciplinary and multi-professional scientific and technical societies involved in physiotherapy  
34  
35 145 and rehabilitation care (n=26) and the societies dealing with forensics (n=1). These societies were  
36  
37  
38 146 identified from the published endorsed by the Italian Ministry of Health and are recognized as the  
39  
40 147 ones entitled to generate national clinical practice guidelines.(21, 22) Each society delegated their  
41  
42 148 most representative member involved in physiotherapy and rehabilitation care to join the panel of  
43  
44  
45 149 experts. The panel of expert members was multidisciplinary and multi-professional, including  
46  
47 150 clinicians, researchers, and healthcare managers from different fields(24) (e.g., orthopedics,  
48  
49 151 neurology). To represent patients' perspectives, the panel also included a lay member from  
50  
51  
52 152 Cittadinazattiva,(25) the largest Italian patient advocate organization that promotes citizen activism  
53  
54 153 for the protection of rights, the care of common goods, and support for people in conditions of  
55  
56 154 weakness.

57  
58 155

#### 59 60 156 ***Phase II. Generation of statements***

1  
2  
3 157 Firstly, the steering committee formulated statements aimed at safety based on evidence and clinical  
4  
5 158 expertise. Particularly, evidence was summarized from a published scoping review and its  
6  
7  
8 159 supplementary materials,(5) which gathered information about the safety of the nine PAMs from 117  
9  
10 160 systematic reviews in physiotherapy and rehabilitation medicine (e.g. safety of PAMs for low back  
11  
12 161 pain, osteoarthritis, stroke, urinary incontinence). Clinical expertise was assured by content experts of  
13  
14  
15 162 AIFI (e.g., musculoskeletal disorders, orthopedic and neurological physiotherapy and pelvic floor  
16  
17 163 rehabilitation) adding examples of clinical conditions for which they commonly safely apply PAMs  
18  
19 164 in their specific field. Disagreements between experts were resolved through discussion.

20  
21 165 The steering committee formulated statements for each PAM (with distinction of evidence and  
22  
23  
24 166 expertise) ensuring that all the potentially relevant topics in the field would be included in the initial  
25  
26 167 list of questions for the first Delphi round (**Supplementary File 2** reported details about each included  
27  
28 168 PAM). Each statement included a statement regarding safety about the following PAMs:

- 30 169 1. Electrical stimulation
- 31  
32  
33 170 2. Neuromodulation, antalgic and interferential electrical currents
- 34  
35 171 3. Extracorporeal shock wave therapy
- 36  
37  
38 172 4. Laser therapy
- 39  
40 173 5. Electromagnetic therapy
- 41  
42 174 6. Diathermy
- 43  
44 175 7. Hot thermal agents
- 45  
46  
47 176 8. Cryotherapy
- 48  
49 177 9. Therapeutic ultrasound
- 50

51 178 Statements were developed for different target conditions. PAMs are delivered by expert healthcare  
52  
53  
54 179 professionals (who had undergone formal education and training) to ensure patient safety in inpatient  
55  
56 180 and outpatient settings. Statements were presented within the relevant rehabilitation field, along with  
57  
58 181 a list of patient conditions in which the PAMs were indicated as safe and supported by evidence and  
59  
60 182 clinical expertise.

1  
2  
3  
4  
5  
6  
7  
8  
9  
10  
11  
12  
13  
14  
15  
16  
17  
18  
19  
20  
21  
22  
23  
24  
25  
26  
27  
28  
29  
30  
31  
32  
33  
34  
35  
36  
37  
38  
39  
40  
41  
42  
43  
44  
45  
46  
47  
48  
49  
50  
51  
52  
53  
54  
55  
56  
57  
58  
59  
60183  
184  
185  
186  
187  
188  
189  
190  
191  
192  
193  
194  
195  
196  
197  
198  
199  
200  
201  
202  
203  
204  
205  
206  
207  
208

### ***Phase III. Rating of statements through Delphi Rounds***

We employed an electronic Delphi process, allowing participants to submit responses anonymously and independently without being biased by other participants' identities and responses. The steering committee reached out to the panel of experts using the SurveyMonkey online platform (Palo Alto, CA, USA; [www.surveymonkey.com](http://www.surveymonkey.com)) and utilized a blinded electronic rating.

The web-based survey comprised two sections: the first concerned the participants' demographics (e.g., type of profession, field of expertise, and years of experience), and the second involved rating the statements. The panel of experts evaluated the proposed statements and provided additional comments using a free text box to ensure complete coverage of the topics. According to the RAND method, the panel of experts used a 9-point Likert scale (i.e., 1-3 = highly inappropriate, 4-6 = undecided, 7-9 = highly appropriate) to rate the level of concordance for each statement.

In addition, experts could abstain from rating by selecting the answer "Not my expertise" for statements they were not familiar with.

A summary of results for each Delphi round was shared as feedback to update panel members on the progress of consensus development, including descriptive statistics, to guide subsequent rounds. The panel of experts were asked to re-rate their evaluation in subsequent rounds only for those statements needing clarification or for statements for which consensus (i.e.,  $\geq 75\%$  on a 7-9 points scale or 1-3 points scale) was not reached.

An anonymous report of each round was provided to each expert, showing the distribution of responses for each statement, along with all additional comments provided in the free text box. Based on previous ratings, statements were modified and presented for the next round. Up to three reminder emails for completion were sent to each participant individually. Data collection occurred over 5 months (June-November 2022).

### ***Phase IV. Workshop Meeting as last round***

1  
2  
3 209 After reaching a consensus, the steering committee joined an online meeting to refine statements  
4  
5 210 according to each expert's contribution and confirm which statements would be included in the final  
6  
7  
8 211 criteria list. Finally, the panel of experts was asked to rate the final statements list for the closing audit  
9  
10 212 procedure.

### 11 12 213 13 14 214 **Definition and calculation of consensus**

15  
16  
17 215 In agreement with the RAND appropriateness method, we adopted predefined criteria(26) to assess  
18  
19 216 the consensus in the Delphi method, using the proportion of ratings with a threshold of 75%.(27)  
20  
21 Specifically:  
22 217

- 23  
24 218  
25  
26 219 1. Consensus in:  $\geq 75\%$  of participants scored the item as "highly appropriate" (score 7 to 9),  
27  
28 220 and  $< 15\%$  scored the item as of "highly inappropriate" (score 1 to 3)
- 29  
30 221 2. Consensus out:  $\geq 75\%$  of participants scored the item as of "highly inappropriate" (score  
31  
32 222 1 to 3), and  $< 15\%$  scored the item as "highly appropriate" (score 7 to 9)
- 33  
34 223 3. No consensus: All other results.  
35  
36  
37  
38 224

### 39 40 225 **Statistical Analysis**

41  
42 226 Descriptive statistics were used to describe general characteristic of participants, summarised as  
43  
44 227 median and interquartile range (IQR) and counts and percentage (%), as appropriate. Each statement  
45  
46  
47 228 was analysed quantitatively by the percentage of agreement ratings.  
48  
49 229

### 50 51 230 **Role of the Funding Source**

52  
53 231 AIFI supported this research. The funder played no role in this study's design, conduct, or reporting.  
54  
55  
56 232

### 57 58 233 **Patient and public involvement**

59  
60 234 In this study, a patient representative participated in the panel of experts to rate the statements.

1  
2  
3  
4  
5  
6  
7  
8  
9  
10  
11  
12  
13  
14  
15  
16  
17  
18  
19  
20  
21  
22  
23  
24  
25  
26  
27  
28  
29  
30  
31  
32  
33  
34  
35  
36  
37  
38  
39  
40  
41  
42  
43  
44  
45  
46  
47  
48  
49  
50  
51  
52  
53  
54  
55  
56  
57  
58  
59  
60

## 235 RESULTS

### 236 Participants

237 Out of the 28 scientific and technical societies/organizations that were invited as panel of experts,  
238 two declined their interest in participation, while nine did not provide a response. Finally, 17  
239 societies/organizations (invitation rate: 61%), each represented by their most representative expert  
240 member, were included (**Figure 2**). The majority of experts were clinicians (88.2%), with half having  
241 expertise in musculoskeletal disorders (47.1%). Others were specialized in areas such as pelvic floor  
242 (23.5%), neurological (17.6%), lymphatic disorders (5.9%), pediatrics (5.9%). The panel also  
243 included a forensic and a lay member as patient representative. On average, experts had a median of  
244 30 years of experience (IQR 17-36) in their respective fields. All general characteristics are reported  
245 in **Table 1**. No conflict of interest was present (**Supplementary File 3**).

[Figure 2]

[Table 1]

### 250 Delphi rounds

251 Two Delphi Rounds were necessary to reach a consensus.

#### 253 Round 1

254 Overall, 17 experts panel participants completed the survey (participation rate: 100%). All statements  
255 passed the first round with a consensus of 75% (**Table 2**). Five experts offered justifications for their  
256 choices (e.g., examples of clinical practice) and provided important inputs for the statements. In  
257 particular, most of them raised concerns about the safe use of PAMs in children. Additionally, they  
258 suggested refining the purpose of the statements, emphasizing that the focus was on patient safety  
259 rather than provider safety. Some experts reported uncertainties about safe use of PAMs based on  
260 their experiences. For example, one expert mentioned the possibility of mild skin irritation in hot

1  
2  
3 261 thermal therapies, and another suggested caution in the use of cryotherapy due to risk of cold burns,  
4  
5 262 especially if patients are not well informed or supervised. Then, one expert expressed uncertainty  
6  
7  
8 263 about the safety of long-term use of electromagnetic therapies. Some experts suggested the safe use  
9  
10 264 of PAMs in other fields of applications such as the use of diathermia in the dermatology for Lichen  
11  
12 265 Sclerosus, which was out of our purposes. All comments were considered in the release of the  
13  
14  
15 266 statements (**Supplementary File 4**).

16  
17 267 [Table 2]  
18  
19 268  
20

### 21 269 *Round 2*

22  
23 270 The statements from Round 1 were reviewed based on panel comments for the subsequent assessment  
24  
25  
26 271 in Round 2, with a specific restriction on the adult population and a clearer emphasis on patient safety.  
27  
28 272 In Round 2, a total of 14 expert panel participants completed the survey (participation rate: 82%), and  
29  
30 273 all the statements achieved consensus out of the 75% threshold. (**Table 2**). One expert provided  
31  
32 274 additional comments including examples of expertise, which were subsequently integrated into the  
33  
34  
35 275 final list of statements. In particular, low-level laser therapy could exacerbate genital dryness,  
36  
37 276 necessitating additional interventions to improve hydration during the treatment period and mitigate  
38  
39 277 discomfort for patients. Additionally, there was uncertainty regarding the application of other  
40  
41  
42 278 therapies, such as electrical stimulation and extracorporeal shock wave therapy, in certain fields due  
43  
44 279 to limited expertise (**Supplementary File 4**).  
45

### 46 280 47 48 49 281 *Workshop Meeting*

50  
51  
52 282 On September 27, 2022, nine experts panel participants (completion rate: 53%) joined the online  
53  
54  
55 283 meeting to discuss comments, justifications and highlights. A comprehensive digital presentation of  
56  
57 284 the findings from Round 1 and Round 2 were reported during the workshop. During the meeting, the  
58  
59 285 panel of experts suggested introducing a general note explicitly stating that statements on safety were



1  
2  
3  
4  
5  
6  
7  
8  
9  
10  
11  
12  
13  
14  
15  
16  
17  
18  
19  
20  
21  
22  
23  
24  
25  
26  
27  
28  
29  
30  
31  
32  
33  
34  
35  
36  
37  
38  
39  
40  
41  
42  
43  
44  
45  
46  
47  
48  
49  
50  
51  
52  
53  
54  
55  
56  
57  
58  
59  
60

286 not extended to different subgroups of the population (e.g., children, adolescents,  
287 immunocompromised individuals) due to lack of literature.

288 The final list of statements, along with this general note, was shared via SurveyMonkey for final  
289 approval. All 17 experts panel participants (approval rate: 100%) approved and released the final list  
290 of statements. One expert selected the option "Not my expertise" for the statement on cryotherapy  
291 (**Table 2**). In **Appendix 1**, we reported the final criteria list released for good clinical practice with  
292 details of sources (evidence and expertise) and applications in different fields and clinical conditions.

For peer review only

## 293 **DISCUSSION**

### 294 **Main findings**

295 The SAFE PAMP consensus developed safety statements for Physical Agent Modalities in physical  
296 therapy and rehabilitation practice. The multidisciplinary and multiprofessional panel of experts  
297 participated with a moderate response rate (61%).(28) All nine statements were approved in two  
298 Rounds (consensus of over 75% agreement.) and released in a final workshop meeting with some  
299 adjustments made (e.g., specific population subgroups). In summary, experts agreed on the safety of  
300 PAMs in the adult population (>18 years) when prescribed and applied by a healthcare professional  
301 (e.g., physiotherapist, physician) who is adequately trained and informed, as required by education  
302 and licensure.

### 304 **Literature Context**

305 Earlier consensus documents from different organizations were published in 2001,(6) 2006,(7) and  
306 2010.(8) In 2018, the American Occupational Therapy Association issued a position paper(29)  
307 clarifying the appropriate use of PAMs in contemporary occupation-based occupational therapy  
308 practice, providing clinical case vignettes in their field. Others reported indications and  
309 contraindications about specific types of PAMs (e.g., extracorporeal shock wave therapy(30)). Many  
310 other societies, such as National Institute for Clinical Excellence (NICE), also offer specific clinical  
311 questions guidelines, and we cannot exclude that they can involve recommendations on PAMs (e.g.,  
312 NG59 for low back pain(31)).

313 Overall, the Canadian document(8) represents the most comprehensive guidance on this topic.  
314 However, our Delphi is the most recent consensus on PAMs focusing on statements about safe PAMs  
315 application as clinical practice indications (e.g., field) sustained by literature and clinical expertise.  
316 This does not mean that the contraindications and precautions mentioned in the Canadian guideline(8)  
317 are in contrast to our findings. Simply, we use a complementary perspective. Our Delphi agrees to  
318 define the common safe applications stratifying by fields/conditions whereas the Canadian one

1  
2  
3 319 describes the contraindications and precautions about these common applications in particular  
4  
5 320 situations or under certain circumstances. For instance, both documents recognize cryotherapy and  
6  
7  
8 321 electrical stimulation as commonly safe PAMs in musculoskeletal applications, such as treating ankle  
9  
10 322 sprains and osteoarthritis. However, the Canadian guideline recommends precaution when combining  
11  
12 323 compression with cryotherapy to ensure the preservation of circulation and nerves. Furthermore, the  
13  
14  
15 324 guideline contraindicated the use of electrical stimulation in presence of implanted electronic devices.  
16  
17 325 Although the evidence presented in the Canadian guideline was not systematically collected (Canada  
18  
19 326 and the United States experts in conjunction with multiple sources such as textbooks), it is reasonable  
20  
21  
22 327 to assume that many precautions and contraindications still remain applicable. Nevertheless, it is  
23  
24 328 important to note that guidelines should be updated every three to five years or when new information  
25  
26 329 becomes available.(32, 33)  
27

28 330

### 31 331 **Implications for clinicians**

32  
33 332 Healthcare professionals are encouraged to use a comprehensive approach when using this Delphi  
34  
35 333 consensus. Prior to proposing PAMs to patients, they must collect their medical history (e.g.,  
36  
37  
38 334 comorbidities) to better determine the diagnosis, prognosis, anticipated goals, and expected  
39  
40 335 outcomes.(34) Then, they should incorporate the best research evidence, clinical expertise, patient  
41  
42 336 values, needs, and preferences to propose effective treatments, balancing effectiveness and safety. It  
43  
44  
45 337 is imperative that patients are informed about the possibility of trivial adverse events (e.g., pain and  
46  
47 338 erythema at the application site(5) using extracorporeal shock wave therapy). However, in situations  
48  
49 339 when evidence is lacking and there is a likelihood of moderate to severe harm, caution is advised, and  
50  
51 340 the use of PAM may be reconsidered. In fact, for precautionary reasons (35-37) the developed  
52  
53  
54 341 statements were not generally extended to other subgroups, such as children and adolescents (due to  
55  
56 342 biological tissue in growth phases(38, 39)), and frail individuals (e.g., immunocompromised  
57  
58 343 patients), given the limited and insufficient literature on potential harm. It is important to adhere to  
59  
60 344 these statements in conjunction with precautions and contraindications under specific circumstances,

1  
2  
3 345 referring to equipment manufacturers' manuals and regulatory bodies(40) as well as previous  
4  
5 346 guidelines(8) and standards established by professional associations.  
6  
7  
8 347

### 9 10 348 **Implications for stakeholders**

11  
12 349 Good practices for patients safety should be managed by national agencies with a living monitoring  
13  
14 350 system and shared through international initiatives such as the WHO Global Patient Safety Challenge  
15  
16 Medication Safety(41) to enhance systems and practices adopting corrective action within countries.  
17 351  
18  
19 352 For instance, national and international scientific and technical societies should facilitate the  
20  
21 353 dissemination of CPGs through various strategies, such as storing good clinical practices in shared  
22  
23 repository(42) as well as disseminating plain, patient-oriented versions of good clinical practice  
24 354  
25 statements. This supports patient empowerment and contributes to making the healthcare system more  
26 355  
27 efficient, tailored and safer.(43, 44) We plan to organize meetings with stakeholders and patients,  
28 356  
29 conduct webinars, and provide education and counseling through pamphlets, videos, and social media  
30 357  
31 messages.  
32 358  
33  
34  
35 359

### 36 37 360 **Implications for research**

38  
39  
40 361 We believe that the statements developed by the multidisciplinary and multi-professionally panel of  
41  
42 362 experts can be generalized worldwide. These results could provide essential information to produce  
43  
44 363 national guidelines (e.g., Good Clinical Practices of the Italian Ministry of Health(45)) and  
45  
46 international guidelines to improve patient safety and decrease avoidable harm related to  
47 364  
48 interventions. Studies should convey their efforts to plan and adequately report adverse events before  
49 365  
50 objectively estimating these harms. We call for multicentric randomized controlled trials based on a  
51 366  
52 core outcome set, including harms in addition to benefits.(46) In addition, specific subgroups of  
53 367  
54 populations should be studied. It is a serious matter to exclude a group from research eligibility, and  
55 368  
56 this should only be done when no less restrictive option is sufficient to ensure protection from undue  
57 369  
58 risk.(47)  
59  
60 370

1  
2  
3 371 Lastly, future studies can better expand our statements to ensure the safest and most optimal modality  
4  
5 372 application of the proposed PAMs (e.g., optimal voltage, amperage, frequency, current density, dose),  
6  
7  
8 373 as well as contraindications and precautions, especially for the mentioned subgroups (e.g., children,  
9  
10 374 immunocompromised individuals).(48)

11  
12 375

### 14 15 376 **Strength and limitations**

16  
17 377 This represents the first effort to provide guidance on the safety of PAMs in physiotherapy and  
18  
19 378 rehabilitation. We strictly followed published guidelines for reporting and conduction. In addition,  
20  
21  
22 379 we *a-priori* publicly registered the consensus criterion used to determine agreement within the Delphi  
23  
24 380 process. (26, 49) We adopted one of the most conservative thresholds for obtaining the consensus  
25  
26 381 (75%)(27), and in all rounds, this threshold was reached with a high percentage of agreements.  
27  
28  
29 382 However, some downsides should be acknowledged. We did not cover statements about the clinical  
30  
31 383 effectiveness of PAMs, as our aim was to make patients, healthcare providers and policy-makers  
32  
33 384 aware about the safety application of PAMs in clinical practice. As well, we did not aim to report  
34  
35 385 specific contraindications as we started collecting evidence from systematic reviews that reported  
36  
37  
38 386 safety outcomes from primary studies, which may not always encompass real-world conditions, such  
39  
40 387 as the presence of comorbidities (e.g., active deep vein thrombosis). Furthermore, evidence-informed  
41  
42 388 by systematic reviews did not find enough information about the risk for specific population (e.g.,  
43  
44  
45 389 hemato-oncological patients with severe immunocompromised or coagulopathy). However, based on  
46  
47 390 the principle of precaution, the panel agreed to add as a general note about precautions in specific  
48  
49 391 subgroups of the population, in the absence of literature. As with all Delphi process, our study relies  
50  
51 392 on national expert response and may not capture the full range of perspectives or experiences.(16, 50)  
52  
53  
54 393 Nevertheless, we tried to involve multidisciplinary and multi-professional experts (as occurs in  
55  
56 394 clinical practice guidelines) enabling confrontations in anonymity (avoiding negatively influencing  
57  
58 395 outcomes and encouraging balanced consideration of ideas). Then, statements were developed  
59  
60 396 starting from the scoping review(5), which mapped and summarized safety in population and

1  
2  
3 397 intervention areas without assessing the certainty of evidence (e.g., grading of the certainty of  
4  
5 398 evidence).(5) Lastly, even though we generated statements based on the latest available evidence, we  
6  
7  
8 399 should recognize that adverse events may be under-estimated since safety outcome is commonly  
9  
10 400 poorly reported in the literature (11, 12, 51).  
11

## 12 401 13 14 **CONCLUSION** 15 402

16  
17 403 These evidence-based statements inform patients, healthcare professionals, and policy-makers about  
18  
19 404 the safety of a wide range of PAMs in various fields and conditions of physiotherapy and  
20  
21  
22 405 rehabilitation practice, following comprehensive clinical evaluation of patients' needs. All of these  
23  
24 406 statements should be associated to precautions and contraindications for specific cases, referring to  
25  
26 407 previous guidelines, equipment manufacturers' manual and regulatory bodies. This consensus can  
27  
28 408 provide a basis for decision-making and future research.  
29  
30  
31  
32  
33  
34  
35  
36  
37  
38  
39  
40  
41  
42  
43  
44  
45  
46  
47  
48  
49  
50  
51  
52  
53  
54  
55  
56  
57  
58  
59  
60

1  
2  
3 409 **DECLARATIONS**

4  
5 410 **Author Contributions**

6  
7  
8 411 Concept/idea/research design: S. Gianola, S. Bargerì, G. Castellini

9  
10 412 Writing: S. Gianola, S. Bargerì, G. Castellini

11  
12 413 Data collection: S. Gianola, S. Bargerì

13  
14 414 Data analysis: S. Gianola, S. Bargerì

15  
16 415 Project management: S. Gianola, S. Bargerì

17  
18  
19 416 Consultation (including review of manuscript before submitting): S. Gianola, S. Bargerì, L.

20  
21 417 Pellicciari, S. Gambazza, G. Rossetti, A. Fulvio, V. Genovese, M. Benedini, E. Proverbio, S.

22  
23 418 Cecchetto, G. Castellini, A. Turolla, and SAFE PAMP Collaborators

24  
25  
26 419  
27  
28 420 **Ethics Approval**

29  
30 421 This study was declared exempt from institutional review board review.

31  
32  
33 422  
34  
35 423 **Disclosures**

36  
37 424 The authors and SAFE PAMP Collaborators declared they had no conflicts of interest.

38  
39  
40 425  
41  
42 426 **Funding**

43  
44 427 This work was supported and funded by Associazione Italiana di Fisioterapia (AIFI). The APC was  
45  
46 428 funded by AIFI. This research did not receive specific grant from any funding agency in the public,  
47  
48 429 commercial or not-for-profit sectors.

49  
50  
51 430  
52  
53 431 **Data sharing statement**

54  
55 432 Research data are stored in OSF repository <https://osf.io/w8kgs/> (19)

56  
57  
58 433  
59  
60 434 **Manuscript word count: 3275/4000**

1  
2  
3  
4  
5  
6  
7  
8  
9  
10  
11  
12  
13  
14  
15  
16  
17  
18  
19  
20  
21  
22  
23  
24  
25  
26  
27  
28  
29  
30  
31  
32  
33  
34  
35  
36  
37  
38  
39  
40  
41  
42  
43  
44  
45  
46  
47  
48  
49  
50  
51  
52  
53  
54  
55  
56  
57  
58  
59  
60

435 **Figure 1.** Phases of the RAND Delphi process

436 **Figure 2.** Flow chart of Delphi process

437 **Table 1.** General characteristics of experts panels

438 **Table 2.** Agreement results for each round.

For peer review only



1  
2  
3  
4  
5  
6  
7  
8  
9  
10  
11  
12  
13  
14  
15  
16  
17  
18  
19  
20  
21  
22  
23  
24  
25  
26  
27  
28  
29  
30  
31  
32  
33  
34  
35  
36  
37  
38  
39  
40  
41  
42  
43  
44  
45  
46  
47  
48  
49  
50  
51  
52  
53  
54  
55  
56  
57  
58  
59  
60**REFERENCES**

1. McCann J, Roy C, Ward C. Rehabilitation medicine. Available at <https://www.bsrm.org.uk/downloads/rehabilitationmedicine-final.pdf>. Accessed on May 2023.
2. Kreutzer JS, Gervasio AH, Camplair PS. Primary caregivers' psychological status and family functioning after traumatic brain injury. *Brain injury*. 1994;8(3):197-210.
3. Caserta MS, Lund DA, Wright SD. Exploring the Caregiver Burden Inventory (CBI): further evidence for a multidimensional view of burden. *International journal of aging & human development*. 1996;43(1):21-34.
4. Cameron M. *Physical Agents in Rehabilitation An Evidence-Based Approach to Practice*. 5th Edition ed: Elsevier; 2016.
5. Barger S, Pellicciari L, Gallo C, Rossetini G, Castellini G, Gianola S, et al. What is the landscape of evidence about the safety of physical agents used in physical medicine and rehabilitation? A scoping review. *BMJ Open*. 2023;13(6):e068134.
6. Robertson V, Chipchase L, Laakso L, Whelan K, McKenna L. *Guidelines for the clinical use of electrophysical agents*. 2001.
7. *Guidance for the clinical use of electrophysical agents*. London: Chartered Society of Physiotherapy; 2006.
8. ELECTROPHYSICAL AGENTS - Contraindications And Precautions: An Evidence-Based Approach To Clinical Decision Making In Physical Therapy. *Physiother Can*. 2010;62(5):1-80.
9. Iijima H, Takahashi M. Microcurrent Therapy as a Therapeutic Modality for Musculoskeletal Pain: A Systematic Review Accelerating the Translation From Clinical Trials to Patient Care. *Arch Rehabil Res Clin Transl*. 2021;3(3):100145.
10. Mendes LA, Lima IN, Souza T, do Nascimento GC, Resqueti VR, Fregonezi GA. Motor neuroprosthesis for promoting recovery of function after stroke. *Cochrane Database Syst Rev*. 2020;1(1):Cd012991.
11. Carlesso LC, Macdermid JC, Santaguida LP. Standardization of adverse event terminology and reporting in orthopaedic physical therapy: application to the cervical spine. *J Orthop Sports Phys Ther*. 2010;40(8):455-63.
12. Sachse T, Mathes T, Dorando E, Heß S, Thürmann P, Schmiedl S, et al. A review found heterogeneous approaches and insufficient reporting in overviews on adverse events. *J Clin Epidemiol*. 2022;151:104-12.
13. Moher D, Schulz KF, Simera I, Altman DG. Guidance for developers of health research reporting guidelines. *PLoS Med*. 2010;7(2):e1000217.
14. Hasson F, Keeney S, McKenna H. Research guidelines for the Delphi survey technique. *J Adv Nurs*. 2000;32(4):1008-15.
15. Niederberger M, Spranger J. Delphi Technique in Health Sciences: A Map. *Front Public Health*. 2020;8:457.
16. Junger S, Payne SA, Brine J, Radbruch L, Brearley SG. Guidance on Conducting and Reporting DELphi Studies (CREDES) in palliative care: Recommendations based on a methodological systematic review. *Palliat Med*. 2017;31(8):684-706.
17. Equator network. Enhancing the QUALity and Transparency Of health Research. Available at <https://www.equator-network.org/reporting-guidelines/credes/>. Accessed on September 2023.
18. European Commission. Ethics and data protection. Available at [https://ec.europa.eu/info/funding-tenders/opportunities/docs/2021-2027/horizon/guidance/ethics-and-data-protection\\_he\\_en.pdf](https://ec.europa.eu/info/funding-tenders/opportunities/docs/2021-2027/horizon/guidance/ethics-and-data-protection_he_en.pdf). Accessed on May 2023.
19. [dataset] Gianola, S., Barger S., Castellini, G., Gambazza, S., Rossetini, G., Turolla, A., & Pellicciari, L. Data from: Italian suggestions about the safety of physical agents in physical therapy and rehabilitation medicine. Open Science Framework repository (OSF), October 4, 2023. <https://osf.io/w8kgs/>.

- 1  
2  
3 488 20. Associazione Italiana di Fisioterapia (AIFI). Available at <https://aifi.net/>. Accessed on  
4 489 September 2023.
- 5 490 21. Legge 8 marzo 2017, n. 24 Disposizioni in materia di sicurezza delle cure e della persona  
6 491 assistita, nonché in materia di responsabilità professionale degli esercenti le professioni sanitarie.  
7 492 Available at <https://www.gazzettaufficiale.it/eli/id/2017/03/17/17G00041/sg> Accessed on April  
8 493 2022.
- 9 494 22. Basagni B, Navarrete E, Bertoni D, Cattran C, Mapelli D, Oddy M, et al. The Italian version  
10 495 of the Brain Injury Rehabilitation Trust (BIRT) personality questionnaires: five new measures of  
11 496 personality change after acquired brain injury. *Neurological sciences : official journal of the Italian  
12 497 Neurological Society and of the Italian Society of Clinical Neurophysiology*. 2015;36(10):1793-8.
- 13 498 23. Akins RB, Tolson H, Cole BR. Stability of response characteristics of a Delphi panel:  
14 499 application of bootstrap data expansion. *BMC Med Res Methodol*. 2005;5:37.
- 15 500 24. Birko S, Dove ES, Ozdemir V. Evaluation of Nine Consensus Indices in Delphi Foresight  
16 501 Research and Their Dependency on Delphi Survey Characteristics: A Simulation Study and Debate  
17 502 on Delphi Design and Interpretation. *PLoS One*. 2015;10(8):e0135162.
- 18 503 25. Cittadinanzattiva. Available at <https://www.cittadinanzattiva.it/>. Accessed on October 2023.
- 19 504 26. Grant S, Booth M, Khodyakov D. Lack of preregistered analysis plans allows unacceptable  
20 505 data mining for and selective reporting of consensus in Delphi studies. *J Clin Epidemiol*.  
21 506 2018;99:96-105.
- 22 507 27. Diamond IR, Grant RC, Feldman BM, Pencharz PB, Ling SC, Moore AM, et al. Defining  
23 508 consensus: a systematic review recommends methodologic criteria for reporting of Delphi studies. *J  
24 509 Clin Epidemiol*. 2014;67(4):401-9.
- 25 510 28. Fincham JE. Response rates and responsiveness for surveys, standards, and the Journal. *Am  
26 511 J Pharm Educ*. 2008;72(2):43.
- 27 512 29. Physical Agents and Mechanical Modalities. *Am J Occup Ther*.  
28 513 2018;72(Supplement\_2):7212410055p1-p6.
- 29 514 30. International Society for Medical Shockwave Treatment (ISMST). Consensus statement on  
30 515 ESWT Indications and Contraindications. Available at  
31 516 [https://www.shockwavetherapy.org/fileadmin/user\\_upload/ISMST\\_Guidelines.pdf](https://www.shockwavetherapy.org/fileadmin/user_upload/ISMST_Guidelines.pdf). Accessed on  
32 517 October 2023.
- 33 518 31. de Campos TF. Low back pain and sciatica in over 16s: assessment and management NICE  
34 519 Guideline [NG59]. *J Physiother*. 2017;63(2):120.
- 35 520 32. Shekelle PG, Ortiz E, Rhodes S, Morton SC, Eccles MP, Grimshaw JM, et al. Validity of the  
36 521 Agency for Healthcare Research and Quality clinical practice guidelines: how quickly do guidelines  
37 522 become outdated? *Jama*. 2001;286(12):1461-7.
- 38 523 33. Shekelle P, Eccles MP, Grimshaw JM, Woolf SH. When should clinical guidelines be  
39 524 updated? *Bmj*. 2001;323(7305):155-7.
- 40 525 34. WCPT. Standards of physical therapy practice [https://world.physio/sites/default/files/2020-  
41 526 07/G-2011-Standards-practice.pdf](https://world.physio/sites/default/files/2020-07/G-2011-Standards-practice.pdf).
- 42 527 35. European Parliament. The precautionary principle: Definitions, applications and governance.  
43 528 Available at [https://www.europarl.europa.eu/thinktank/en/document/EPRS\\_IDA\(2015\)573876](https://www.europarl.europa.eu/thinktank/en/document/EPRS_IDA(2015)573876).  
44 529 Accessed on May 2023.
- 45 530 36. Commission. E. The precautionary principle: decision making under uncertainty. Available  
46 531 at  
47 532 [https://ec.europa.eu/environment/integration/research/newsalert/pdf/precautionary\\_principle\\_decisi  
49 534 on\\_making\\_under\\_uncertainty\\_FB18\\_en.pdf](https://ec.europa.eu/environment/integration/research/newsalert/pdf/precautionary_principle_decisi<br/>48 533 on_making_under_uncertainty_FB18_en.pdf). Accessed on July 2023.
- 50 535 37. European Parliament. The precautionary principle. Available at  
51 536 [https://www.europarl.europa.eu/RegData/etudes/IDAN/2015/573876/EPRS\\_IDA\(2015\)573876\\_EN  
53 538 .pdf](https://www.europarl.europa.eu/RegData/etudes/IDAN/2015/573876/EPRS_IDA(2015)573876_EN<br/>52 537 .pdf). Accessed on January 2024.
- 54  
55  
56  
57  
58  
59  
60

1

2

3 537 38. Yeom M, Kim SH, Lee B, Zhang X, Lee H, Hahm DH, et al. Effects of laser acupuncture on  
4 538 longitudinal bone growth in adolescent rats. *Evid Based Complement Alternat Med*.  
5 539 2013;2013:424587.

6 540 39. Nguyen JC, Markhardt BK, Merrow AC, Dwek JR. Imaging of Pediatric Growth Plate  
8 541 Disturbances. *Radiographics*. 2017;37(6):1791-812.

9 542 40. EUDAMED - European database on medical devices. Available at  
10 543 <https://ec.europa.eu/tools/eudamed/#/screen/home>. Accessed on September 2023.

11 544 41. WHO Global Patient Safety Challenge on Medication Without Harm. Available at  
12 545 <https://www.who.int/publications/i/item/WHO-HIS-SDS-2017.6>. Accessed on June 2023.

13 546 42. AGENAS. Agenzia Nazionale per i Servizi Sanitari Regionali. Available at  
14 547 <https://www.agenas.gov.it/comunicazione/primo-piano/2111-avvio-call-for-good-practice-2022>.  
16 548 Accessed on May 2023.

17 549 43. Odone A, Buttigieg S, Ricciardi W, Azzopardi-Muscat N, Staines A. Public health  
18 550 digitalization in Europe. *Eur J Public Health*. 2019;29(Supplement\_3):28-35.

19 551 44. Santesso N, Morgano GP, Jack SM, Haynes RB, Hill S, Treweek S, et al. Dissemination of  
20 552 Clinical Practice Guidelines: A Content Analysis of Patient Versions. *Med Decis Making*.  
21 553 2016;36(6):692-702.

22 554 45. Sistema Nazionale Linee Guida - ISS. Buone Pratiche Clinico Assistenziali. Available at  
24 555 <https://www.iss.it/snlg-buone-pratiche>. Accessed on January 2024.

25 556 46. COMET Initiative. Available at [https://www.comet-](https://www.comet-initiative.org/Resources/AdverseEventOutcomes)  
26 557 [initiative.org/Resources/AdverseEventOutcomes](https://www.comet-initiative.org/Resources/AdverseEventOutcomes). Accessed on April 2022.

27 558 47. Langford A, Bateman-House A. Clinical trials for COVID-19: Populations most vulnerable  
28 559 to COVID-19 must be included. *Health Affairs Blog Retrieved December*. 2020;1.

29 560 48. Thabet AA, Ebid AA, El-Boshy ME, Almuwallad AO, Hudaimoor EA, Alsaeedi FE, et al.  
31 561 Pulsed high-intensity laser therapy versus low level laser therapy in the management of primary  
32 562 dysmenorrhea. *J Phys Ther Sci*. 2021;33(9):695-9.

33 563 49. De Meyer D, Kottner J, Beele H, Schmitt J, Lange T, Van Hecke A, et al. Delphi procedure  
34 564 in core outcome set development: rating scale and consensus criteria determined outcome selection.  
35 565 *J Clin Epidemiol*. 2019;111:23-31.

36 566 50. Fink-Hafner D, Dagen T, Doušak M, Novak M, Hafner-Fink M. Delphi Method: Strengths  
37 567 and Weaknesses. *Advances in Methodology and Statistics*. 2019;2:1-19.

38 568 51. Dal-Re R, Ioannidis JP, Bracken MB, Buffler PA, Chan AW, Franco EL, et al. Making  
40 569 prospective registration of observational research a reality. *Sci Transl Med*. 2014;6(224):224cm1.

41

42

43

44

45

46

47

48

49

50

51

52

53

54

55

56

57

58

59

60

571 **Tables**

572

**Table 1. General characteristics of experts panel (n=17)**

| <b>Professional profile*</b> | <b>Responses N (%)</b> |
|------------------------------|------------------------|
| Clinicians                   | 15 (88.2)              |
| Researchers                  | 7 (41.2)               |
| Management                   | 4 (23.5)               |
| <b>Field of expertise*</b>   |                        |
| Musculoskeletal              | 8 (47.1)               |
| Pelvic floor disorders       | 4 (23.5)               |
| Neurological                 | 3 (17.6)               |
| Lymphatic disorders          | 1 (5.9)                |
| Paediatrics                  | 1 (5.9)                |
| Lay member (Patient)         | 1 (5.9)                |
| Forensic member              | 1 (5.9)                |

\*More than one answer was possible

573

574 **Table 2. Agreement results for each round**

| Statements about the safety of...                                 | ROUND 1                                                  |                                                             | ROUND 2                                                  |                                                             | FINAL LIST |     |
|-------------------------------------------------------------------|----------------------------------------------------------|-------------------------------------------------------------|----------------------------------------------------------|-------------------------------------------------------------|------------|-----|
|                                                                   | Percentage of agreement (7-9 points on the Likert scale) | Percentage of disagreement (1-3 points on the Likert scale) | Percentage of agreement (7-9 points on the Likert scale) | Percentage of disagreement (1-3 points on the Likert scale) | Approved   | NME |
| Electrical stimulation                                            | 85.7                                                     | 7.1                                                         | 85.7                                                     | 0.0                                                         | 100.0      | 0.0 |
| Neuromodulation, antalgic, and interferential electrical currents | 100.0                                                    | 0.0                                                         | 100.0                                                    | 0.0                                                         | 100.0      | 0.0 |
| Extracorporeal shock wave therapy                                 | 83.3                                                     | 0.0                                                         | 76.9                                                     | 0.0                                                         | 100.0      | 0.0 |
| Laser therapy                                                     | 84.6                                                     | 7.7                                                         | 90.9                                                     | 0.0                                                         | 100.0      | 0.0 |
| Electromagnetic therapy                                           | 81.8                                                     | 9.1                                                         | 76.9                                                     | 0.0                                                         | 100.0      | 0.0 |
| Diathermy                                                         | 90.0                                                     | 10.0                                                        | 84.6                                                     | 0.0                                                         | 100.0      | 0.0 |
| Hot thermal agents                                                | 81.8                                                     | 9.1                                                         | 91.7                                                     | 0.0                                                         | 100.0      | 0.0 |
| Cryotherapy                                                       | 75.0                                                     | 0.0                                                         | 90.9                                                     | 0.0                                                         | 94.2       | 5.8 |
| Therapeutic ultrasound                                            | 90.9                                                     | 0.0                                                         | 91.7                                                     | 0.0                                                         | 100.0      | 0.0 |
| General note <sup>^</sup>                                         | -                                                        | -                                                           | -                                                        | -                                                           | 100.0      | 0.0 |

575 <sup>^</sup>added for the Final Criteria List

576 Abbreviations: NME: not my expertise

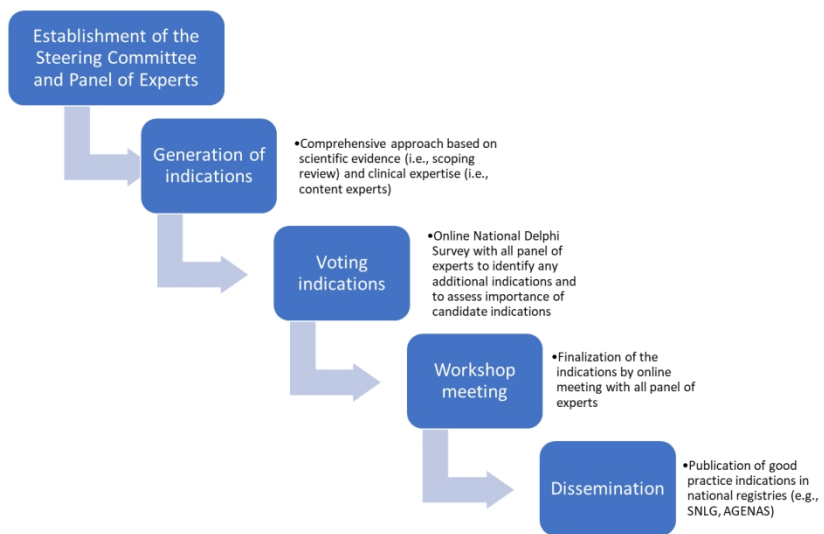

Figure 1

282x150mm (150 x 150 DPI)

1  
2  
3  
4  
5  
6  
7  
8  
9  
10  
11  
12  
13  
14  
15  
16  
17  
18  
19  
20  
21  
22  
23  
24  
25  
26  
27  
28  
29  
30  
31  
32  
33  
34  
35  
36  
37  
38  
39  
40  
41  
42  
43  
44  
45  
46  
47  
48  
49  
50  
51  
52  
53  
54  
55  
56  
57  
58  
59  
60

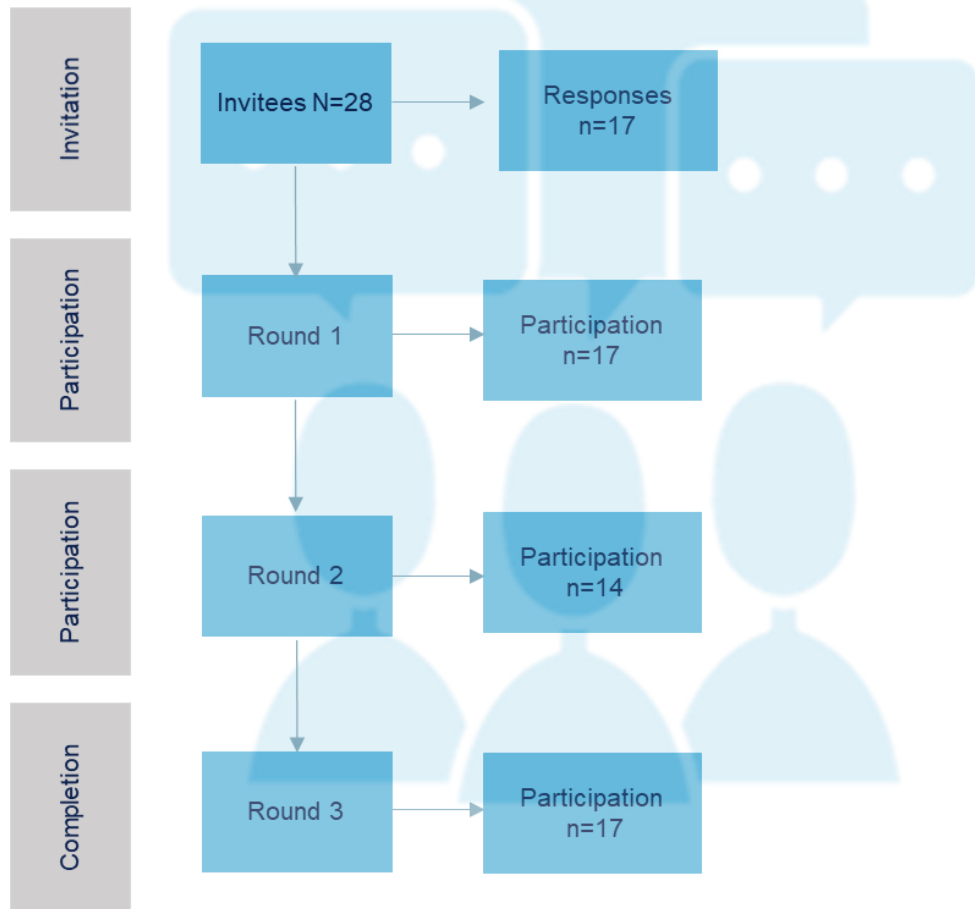

Figure 2

138x140mm (150 x 150 DPI)

## 1 **Appendix 1. Final criteria list**

### 2 **Introduction**

3 The statements are focused on the adult population. Each statement was developed based on the  
4 scientific literature (i.e., evidence) and the experience of content experts from the Associazione  
5 Italiana di Fisioterapia - AIFI (i.e., expertise) with details for clinical conditions in the relevant  
6 rehabilitation fields.

7 *Target group:* statements were developed for adults (> 18 years). Physical agents modalities (PAMs)  
8 are delivered by expert healthcare professionals (who had undergone formal education and training)  
9 to ensure patient safety in both inpatient and outpatient settings.

10 *Conditions of application:* statements were presented within the relevant rehabilitation field  
11 according to *informed-evidence* and *expertise-based* consensus.

12 *Evidence:* this section has been defined based on a scoping review of the literature conducted by  
13 two independent reviewers focusing on the safety of PAMs from 117 systematic reviews in  
14 physiotherapy and rehabilitation medicine (5).

15 *Expertise:* this section has been formulated by the steering committee, which included different  
16 content experts from AIFI (e.g., neurological, musculoskeletal, pelvic floor, physical therapies), with  
17 additional inputs from the multidisciplinary and multi-professional panel of experts.

### 18 **Final list of statements**

19 **1. Electrical stimulation (e.g., Functional electrical stimulation (FES), Neuromuscular**  
20 **electrical stimulation (NMES), Electrical muscle stimulation (EMS)) is safe in the adult**  
21 **population**



1  
2  
3 22 - *in musculoskeletal disorders, especially in the following conditions:*

4  
5  
6 23 o Evidence: neck pain, knee osteoarthritis, musculoskeletal pain, muscle hypotrophy.

7  
8  
9  
10 24 o Expertise: spinal osteoarthritis, knee osteoarthritis, musculoskeletal pain, knee  
11  
12 25 osteoarthritis, muscle and joint pain.

13  
14  
15  
16 26 - *in pelvis-perineal disorders, especially in the following conditions:*

17  
18  
19 27 o Evidence: urinary incontinence, fecal incontinence, lower urinary tract symptoms in  
20  
21 28 postpartum women, overactive bladder.

22  
23  
24  
25 29 o Expertise: prolapse, descending perineum syndrome, perineal hypotonia, bladder-sphincter  
26  
27 30 or anorectal dyssynergia, erectile dysfunction, premature ejaculation, abdominal diastasis.

28  
29  
30  
31 31 - *in neurological disorders, especially in the following conditions:*

32  
33  
34 32 o Evidence: migraine, spasticity in multiple sclerosis, stroke, spinal cord injury.

35  
36  
37  
38 33 o Expertise: post-stroke urinary incontinence, neurogenic bowel dysfunction in spinal cord  
39  
40 34 injury, second motor neuron disease (e.g., Amyotrophic Lateral Sclerosis), muscular  
41  
42 35 dystrophies, head trauma, lesions of the peripheral nervous system.

43  
44  
45  
46 36  
47  
48  
49 37 **2. Neuromodulation, antalgic and interferential electrical currents (e.g., TransCutaneous**

50  
51 38 **Electrical Nerve Stimulation (TENS), Transcutaneous Tibialis Posterior Stimulation (TTNS))**

52  
53  
54 39 **are safe in the adult population**

55  
56  
57 40 - *in musculoskeletal disorders, especially in the following conditions:*

1  
2  
3 41 o Evidence: low back pain, neck pain, rotator cuff disease, whiplash-associated disorders,  
4  
5 42 fibromyalgia.  
6  
7

8  
9 43 o Expertise: musculoskeletal pain, spine osteoarthritis, neuropathic pain.  
10  
11

12 44 - *in pelvis-perineal disorders, especially in the following conditions:*  
13  
14

15 45 o Evidence: overactive bladder, urinary incontinence, fecal incontinence, persistent pelvic  
16  
17 46 pain.  
18  
19

20  
21 47 o Expertise: Urinary incontinence, pudendal neuralgia, constipation, urinary retention.  
22  
23

24  
25 48 - *in neurological disorders, especially in the following conditions:*  
26  
27

28 49 o Evidence: neuropathic pain, stroke, multiple sclerosis, neurogenic bowel dysfunction after  
29  
30 50 spinal cord injury.  
31  
32

33  
34 51 o Expertise: neurogenic bladder dysfunction after central and peripheral nervous system  
35  
36 52 injuries.  
37  
38

39  
40 53

41  
42  
43 54 **3. Extracorporeal shock wave therapy (radial and focal) is safe in the adult population**  
44  
45

46  
47 55 - *in musculoskeletal disorders, especially in the following conditions:*  
48  
49

50 56 o Evidence: soft tissue disorders of the lower limbs, knee tendinopathy, Achilles  
51  
52 57 tendinopathy, osteoarthritis, plantar fasciitis, rotator cuff disease, shoulder tendinopathy and  
53  
54 58 calcifications, acute fracture, orthopedic disorders, consolidation delays, other soft tissue  
55  
56 59 disorders.  
57  
58  
59  
60

1  
2  
3 60 o Expertise: enthesopathies of the upper and lower limbs, calcifications, epicondylitis,  
4  
5 61 epitrocleitis, muscle injuries, muscle contractures, and trigger points.

6  
7  
8  
9 62 - in neurological disorders, especially in the following conditions:

10  
11  
12 63 o Evidence: post-stroke lower limb spasticity, multiple sclerosis spasticity.

13  
14  
15 64 o Expertise: spasticity following head trauma, spasticity following spinal cord injury.

16  
17  
18  
19 65 - in pelvis-perineal disorders, especially in the following conditions:

20  
21  
22 66 o Evidence: chronic prostatitis/chronic pelvic pain syndrome.

23  
24  
25 67 o Expertise: persistent female pelvic pain, Peronye's disease.

26  
27  
28  
29 68 Patients should be informed of the potential undesirable effects following the application of  
30  
31  
32 69 extracorporeal shock wave therapy. Indeed, a recent literature review showed some expected mild  
33  
34 70 adverse events, such as pain and erythema, at the application site.(5)  
35  
36

37  
38 71  
39  
40  
41 72 **4. Laser therapy (e.g., low-level laser therapy (LLLT), high-level laser therapy (HLLT)) is**  
42  
43 73 **safe in the adult population**

44  
45  
46  
47 74 - in musculoskeletal disorders, especially in the following conditions:

48  
49  
50 75 o Evidence: low back pain, Achilles tendinopathy, rotator cuff disease, capsulitis adhesive,  
51  
52 76 lower extremity soft tissue disorders, frozen shoulder, carpal tunnel syndrome, knee  
53  
54  
55 77 osteoarthritis, neck pain, whiplash associated disorders.  
56  
57  
58  
59  
60

1  
2  
3 78 o Expertise: upper and lower limb tendinopathy, acute arthropathy, acute muscle and tendon  
4  
5 79 injuries, acute musculoskeletal pain. Upper and lower limb tendinopathy, acute arthropathy,  
6  
7  
8 80 acute muscle and tendon injury, and acute musculoskeletal pain.  
9

10  
11 81 - *in pelvis-perineal disorders (extracavitary LLLT only), especially in the following conditions:*  
12

13  
14 82 o Evidence: Urinary incontinence and pelvic organ prolapse, persistent pelvic pain.  
15  
16

17  
18 83 o Expertise: healing (episiotomies, laparotomies, lacerations, etc.), inflammatory pelvic  
19  
20 84 pain, edema or perineal hematomas.  
21  
22

23  
24 85 - *in lymphatic disorders (LLLT only), especially in the following conditions:*  
25

26  
27 86 o Evidence: secondary lymphoedema (e.g., breast cancer-related lymphedema).  
28  
29

30  
31 87 o Expertise: lymphoedema  
32  
33

34 88 - *in neurological disorders (LLLT only), especially in the following conditions:*  
35

36  
37  
38 89 o Evidence: Bell's palsy  
39  
40

41 90 o Expertise: stroke, multiple sclerosis, spinal cord injury, head trauma, peripheral nerve  
42  
43 91 injury.  
44  
45

46  
47 92 **5. Electromagnetic therapy (e.g., Pulsed ElectroMagnetic Field Therapy (PEMFT), repetitive**  
48  
49 93 **Peripheral Magnetic Stimulation (rPMS)) is safe in the adult population**  
50  
51

52  
53 94 - *in musculoskeletal disorders, especially in the following conditions:*  
54  
55

56 95 o Evidence: neck pain, fractures, consolidation delays.  
57  
58

59  
60 96 o Expertise: osteoporosis, bone edema, algodystrophy, arthrosis.

1  
2  
3 97 - *in pelvis-perineal disorders, especially in the following conditions:*

4  
5  
6 98 o Evidence: persistent pelvic pain and urinary incontinence.

7  
8  
9  
10 99 o Expertise: fecal incontinence, prolapse, descending perineum syndrome, perineal  
11  
12 100 hypotonia, vesico-sphincteric or anorectal dyssynergia, pudendal neuralgia, pelvic pain  
13  
14 101 acute, erectile dysfunction, premature ejaculation, diastasis recti.  
15  
16  
17

## 18 102 **6. Diathermy (e.g., Short Wave Tecar Therapy) is safe in the adult population**

19  
20  
21  
22 103 - *in musculoskeletal disorders, especially in the following conditions:*

23  
24  
25 104 o Evidence: rotator cuff disease, knee osteoarthritis.

26  
27  
28 105 o Expertise: sub-acute/persistent muscle injuries, DOMS/DOMER, arthropathies (non-  
29  
30 106 acute), osteoarthritis, muscle contractures, trigger points.  
31  
32  
33

34 107 - *in pelvis-perineal disorders, especially in the following conditions:*

35  
36  
37  
38 108 o Evidence: inflammatory pelvic pain, persistent pelvic pain, sexual dysfunction (Peronye's  
39  
40 109 disease).

41  
42  
43 110 o Expertise: prolapse, stress urinary incontinence, scarring (episiotomies, laparotomies,  
44  
45 111 lacerations, etc.), perineal edema or hematoma, vulvovaginal dystrophy and dryness,  
46  
47 112 abdominal diastasis.  
48  
49  
50

## 51 113 **7. Hot thermal agent modalities (e.g., drug-free heat wrap) are safe in the adult population**

52  
53  
54  
55 114 - *in musculoskeletal disorders, especially in the following conditions:*

56  
57  
58 115 o Evidence: groin pain, low back pain.  
59  
60

- 1  
2  
3 116 o Expertise: sub-acute/persistent muscle injuries, DOMS/DOMER, arthropathies (non-  
4  
5 117 acute), osteoarthritis  
6  
7  
8

9 118

10  
11  
12 119 **8. Cryotherapy (e.g., ice or liquid nitrogen) is safe in the adult population**  
13  
14

15  
16 120 *- in musculoskeletal disorders, especially in the following conditions:*  
17  
18

- 19 121 o Evidence: arthroscopy, reconstruction of the anterior cruciate ligament, post-surgery.  
20  
21

- 22  
23 122 o Expertise: Delayed Onset Muscle Soreness (DOMS)/Delayed Onset Muscle Soreness  
24  
25 123 (DOMER), post-surgery, post-trauma (48h).  
26  
27

28  
29 124  
30  
31

32 125 **9. Therapeutic Ultrasound is safe in the adult population**  
33  
34

35 126 *- in musculoskeletal disorders, especially in the following conditions:*  
36  
37

- 38  
39 127 o Evidence: back pain, neck pain, carpal tunnel, rotator cuff disorder, lower limb soft-tissue  
40  
41 128 disorder, knee osteoarthritis, fracture, acute fracture, ankle fracture, ankle and knee sprains,  
42  
43

- 44  
45 129 o Expertise: hand and foot osteoarthritis, calcifications, enthesitis.  
46  
47

48 130 **General notes and considerations related to subgroups:**  
49  
50

51 131 Following a confirmed clinical prescription, applying the above PAMs is safe in the adult  
52  
53

54 132 population (>18 years) under the supervision of an expert operator. For precautionary reasons, these  
55

56 133 statements are not extended to other subgroups of patients (e.g., children, adolescents, frail  
57

58 134 population, etc.) since insufficient literature is available.  
59  
60

1  
2  
3  
4  
5  
6  
7  
8  
9  
10  
11  
12  
13  
14  
15  
16  
17  
18  
19  
20  
21  
22  
23  
24  
25  
26  
27  
28  
29  
30  
31  
32  
33  
34  
35  
36  
37  
38  
39  
40  
41  
42  
43  
44  
45  
46  
47  
48  
49  
50  
51  
52  
53  
54  
55  
56  
57  
58  
59  
60

**Supplementary Files**

*Supplementary File 1. Ethical considerations* .....2  
*Supplementary File 2. Physical agent modalities description*.....3  
*Supplementary File 3. Declaration of interest* .....6  
*Supplementary File 4. Panel of experts comments* .....9  
**REFERENCES**.....12

For peer review only

## Supplementary File 1. Ethical considerations

Participation in the Delphi survey is voluntary and by invitation. The questionnaire includes a beginning section to acquire consent and privacy for data processing. Participants are informed that the responses will have 'remained total confidentiality according to the Regulation on the protection of personal data' 679/2016 of the European Union, and that the results will be used for research purposes and a document shared at the corporate level<sup>1</sup>. The interested party may be interested in the rights provided for by art. 15, 16, 17, 18, 20, 21 and 22 of the Regulation mentioned above.

Database randomization and differential privacy access were achieved. In addition, "anonymization" by generalizing was performed.<sup>2</sup> The study project and data collection were managed and anonymously entrusted by the Unit of Clinical Epidemiology of IRCCS Istituto Ortopedico Galeazzi based in Milano. The data subject cannot be re-identified and is therefore outside the scope of the data protection law<sup>3</sup>.

The row dataset was accessible to two researchers (SG, SB) excluded from participation in Delphi for the quantitative and qualitative analyses. This practice complies with the European standards for the use of aggregative data where the data subject cannot be re-identified, are not personal data and are therefore outside the scope of data protection law<sup>3</sup>. The final report only contains aggregate data. In the final document, we reported the names of the participants who have completed all rounds and gave their consent to disclose their names.



## Supplementary File 2. Physical agent modalities description

1) **Electrical stimulation:** electrotherapeutic currents and waveforms to facilitate neuromuscular or sensory activity to improve muscle strength and reeducate muscle function.<sup>4</sup>

- Neuromuscular electrical stimulation (NMES): use of pulsed currents to stimulate motor nerves, which in turn produce tetanic contractions of the neuromuscular spindles, with or without joint movement.<sup>5</sup>
- Functional Electrical Stimulation (FES) uses electrical pulses to stimulate motor neurons or denervated muscle fibers directly to elicit a contraction during a functional activity (e.g., gait). FES is used in the treatment of orthopedic and neurological conditions.<sup>6</sup>

2) **Neuromodulation, analgic and interferential electrical currents :** electrotherapeutic currents and waveforms to influence physiological effects on the patient's body structures and functions aiming to modulate pain.<sup>4</sup>

- Transcutaneous electrical nerve stimulation (TENS): delivers electrical stimulation via electrodes placed over the intact skin surface near the source of pain to produce analgesia or hypoalgesia. A wide variety of pulsed waveforms are used, with frequencies typically in the range of 1-100Hz. The intensities are set to produce sensory stimulations alone or in combination with motor stimulations to produce muscle twitches (acupuncture-like TENS).<sup>7</sup>
- Transcutaneous Tibialis Posterior Stimulation (TTNS): a form of neuromodulation involving the use of electrical impulses to address urinary symptoms (e.g. overactive bladder) with inhibitory action on neurons of the spinothalamic tract (S2-S3).<sup>8</sup>
- Interferential current (IC): involves crossing two medium frequency currents (most commonly 4000 Hz), which reportedly generates a low-frequency 'beating' (amplitude-modulated) effect at between 0 and 150 Hz in the deep tissues.<sup>9</sup> These beat frequencies are believed to decrease pain, increase circulation and block nerve conduction.

3) **Extracorporeal shock wave therapy:** a nonsurgical treatment that uses the phenomenon of mechanotransduction (i.e., adapting cells biochemical activity, influencing cells migration, proliferation, differentiation and apoptosis)<sup>10 11</sup> to treat various musculoskeletal conditions (e.g., plantar fasciitis; tennis elbow). Shock wave therapy can be either extracorporeal or radial.<sup>12</sup>

- Extracorporeal shock wave therapy (ESWT) involves passing sound waves (or shock waves) through the skin to the affected area. Shock waves are single pulsed acoustic or sonic waves, which dissipate mechanical energy at the interface of two substances with different acoustic impedance.<sup>13</sup> They are produced by generators of an electrical energy source and require an electroacoustic conversion mechanism and a focusing

1  
2  
3 device. Three types of systems can be distinguished based upon the sound source:  
4 electrohydraulic, electromagnetic and piezoelectric systems. Various doses appear to  
5 be used, with no apparent consensus on the minimum therapeutic dose. As defined  
6 defined by Cacchio 2006<sup>14</sup> as low-energy shock waves is less than 0.1 mJ/mm<sup>2</sup> and  
7 high-energy shock waves: is 0.2 mJ/mm<sup>2</sup> to 0.4 mJ/mm<sup>2</sup>).

- 8  
9 - Radial shock wave therapy (RSWT) is generated through the acceleration of a  
10 projectile inside the handpiece of the treatment device and then transmitted radially  
11 from the tip of the applicator to the target zone. Radial shock waves show a lower  
12 peak pressure and a considerably longer rise time than extracorporeal shock waves.  
13 In RSWT, the focal point is not centred on a target zone, as occurs in focal ESWT,  
14 but on the tip of the applicator.<sup>14</sup>

15  
16  
17 **4) Laser therapy:** light source treatment, non-invasive, widely used to treat various  
18 musculoskeletal conditions.

- 19  
20  
21 - Low-level laser therapy (LLLT) generates a beam of light with a particular  
22 wavelength that can deliver light energy to tissue depths below the dermis<sup>15</sup>.  
23 Studies suggest that LLLT contributes to pain relief by reducing pro-inflammatory  
24 cytokines<sup>16</sup>. The effects of LLLT are considered to be dependent on dosage,  
25 wavelength, site and duration of treatment.<sup>15 16</sup>
- 26  
27  
28 - high level laser therapy (HLLT): laser with an output power greater than 500 mW  
29 or 0.5 Watts. HLLT creates heat on the surface of the skin due to their higher power  
30 density (irradiance).<sup>17</sup>

31  
32  
33  
34 **5) Electromagnetic therapy:** based on Faraday's law of electromagnetic induction, to promote  
35 bone healing, treat osteoarthritis and inflammatory diseases of the musculoskeletal system,  
36 alleviate pain, enhance healing of ulcers and reduce spasticity<sup>18</sup>.

37  
38 - Pulsed Electromagnetic Field therapy (PEMF), which involves the delivery of pulsing (that  
39 is 'on-off') low-frequency magnetic fields through the body, which is believed to provide  
40 temporary pain relief by influencing tissue generation and cell proliferation.<sup>19</sup>

41  
42  
43 - Repetitive magnetic stimulation (rMS), which allows the transcutaneous induction of nerve  
44 stimulating electric currents. This technique requires extremely strong and sharp magnetic  
45 impulses (for example 15,000 amperes peak current; 2.5 T field strength; < 1 msec) applied  
46 by specially designed coils (< 10 cm) over the target area. Modern devices allow the repetition  
47 of up to 60 impulses per second. Mainly developed to study and influence brain functions,  
48 rMS also stimulates spinal chord fibres and peripheral nerves. Initial studies used peripheral  
49 rMS for therapeutic reasons, such as in myofascial pain syndrome<sup>20</sup>. Since the resulting small  
50 electric impulses are the nerve stimulating factor, rMS effects may be similar to TENS.

51  
52  
53  
54 **6) Shortwave and microwave Diathermy**

- 55  
56 - Tecartherapy or radiofrequency diathermy (RFD) is a non-invasive therapy and  
57 consists in the emission of high-frequency electromagnetic waves which increase  
58 tissue metabolism. This process promotes tissue repair and affects pain  
59 sensitivity.<sup>21 22 23</sup>

- 1  
2  
3  
4  
5  
6  
7  
8  
9  
10  
11  
12  
13  
14  
15  
16  
17  
18  
19  
20  
21  
22  
23  
24  
25  
26  
27  
28  
29  
30  
31  
32  
33  
34  
35  
36  
37  
38  
39  
40  
41  
42  
43  
44  
45  
46  
47  
48  
49  
50  
51  
52  
53  
54  
55  
56  
57  
58  
59  
60
- Microwave diathermy: a deep heating modality that converts electromagnetic energy to thermal energy. Frequencies approved for therapeutic microwave are 915 MHz (wavelength 33 cm) and 2,456 MHz (wavelength 12 cm). The lower frequency has the advantage of increased depth of penetration but also the disadvantages of greater beam dispersion and the requirement of larger applicators. If muscle heating is primary objective, 915-MHz applicators are preferable to 2,456-MHz applicators. Average temperatures of approximately 41°C at a depth of 1–3 cm have been demonstrated<sup>24</sup>

- 7) **Hot thermal agents:** heat transferred from an object with direct contact to the body. Heat therapy include hot packs, heatwraps, hot/warm water immersion, sauna. Heat treatment increases metabolism in tissues, promotes blood circulation and reduces pain. The temperature of the heat therapy is generally 35–40°C.<sup>25 26</sup>
- 8) **Cryotherapy:** cold is transferred from an object with direct contact to the body. Examples include cold packs, cold-water immersion ( $\leq 15^{\circ}\text{C}$ ), ice massage, the novel modality of cryotherapy. Cryotherapy is a treatment involving very short exposures to extremely cold dry air to the whole patient or a treatment area (mean temperature of the cryotherapy chamber is at  $-30^{\circ}\text{C}$ ,  $-80$  to  $-110^{\circ}\text{C}$ , or  $< -110^{\circ}\text{C}$ ). Cold treatment is thought to reduce swelling and cell metabolism, minimizing oedema, pain and injury.<sup>25 27</sup>
- 9) **Therapeutic Ultrasound:** delivers energy to deep tissue sites through ultrasonic waves (often at frequencies of 1 or 3 MHz and intensities between 0.1 watts/cm<sup>2</sup> and 3 watts/cm<sup>2</sup>) using a crystal sound head. Treatment can be delivered in two forms, continuous (non- stop ultrasonic waves) and pulsed (intermittent ultrasonic waves<sup>22 28</sup>). The treatment aim to increase tissue temperature and induce non-thermal physiological changes (such as cell permeability and cell growth), which are believed to promote soft tissue healing and muscle relaxation.<sup>29</sup>

### Supplementary File 3. Declaration of interest

| Name and Surname        | Affiliation                                                                                                                         | Scientific and Technical Societies                                                                                                                                       | Conflict of interest declared |
|-------------------------|-------------------------------------------------------------------------------------------------------------------------------------|--------------------------------------------------------------------------------------------------------------------------------------------------------------------------|-------------------------------|
| <b>Armando Perrotta</b> | IRCCS Neuromed,<br>Pozzilli (IS)                                                                                                    | Società Italiana per lo Studio delle<br>Cefalee (SISC)                                                                                                                   | none                          |
| <b>Viviana Rosati</b>   | A.U.O. Policlinico<br>Umberto I                                                                                                     | Società Italiana di Riabilitazione<br>Neurologica (SIRN)                                                                                                                 | none                          |
| <b>Enrico Marinelli</b> | Department of<br>Anatomical,<br>Histological, Forensic,<br>and Orthopedic<br>Sciences, "Sapienza"<br>University of Rome             | Società Italiana di Medicina Legale e<br>delle Assicurazioni (SIMLA) -<br>Dipartimento di Scienze Biotechologiche<br>e Medico-chirurgiche Università di Roma<br>Sapienza | none                          |
| <b>Bianca Masturzo</b>  | Obstetrics and<br>Gynecology<br>department. Ospedale<br>degli infermi.<br>Ponderano (Biella)                                        | Associazione degli Ostetrici e Ginecologi<br>Ospedalieri Italiani (AOGOI)                                                                                                | none                          |
| <b>Mauro Roselli</b>    | ASL CittadiTorino-<br>Ospedale Martini-S.C.<br>Ortopedia e<br>Traumatologia                                                         | Ortopedici Traumatologi Ospedalieri<br>d'Italia (OTODI)                                                                                                                  | none                          |
| <b>Stefano Vercelli</b> | Laboratorio di Ricerca<br>in Riabilitazione 2rLab,<br>Dipartimento<br>Economia Aziendale,<br>Sanità e Sociale.<br>SUPSI. Manno (CH) | Federazione Italiana delle Associazione<br>Scientifiche di Fisioterapia (FIASF)                                                                                          | none                          |
| <b>Gianmarco Rea</b>    | Asl Latina, 04100<br>Latina, Italy                                                                                                  | Società Italiana di Medicina Generale e<br>delle Cure Primarie (SIMG)                                                                                                    | none                          |

|                            |                                                                                                               |                                                                                    |      |
|----------------------------|---------------------------------------------------------------------------------------------------------------|------------------------------------------------------------------------------------|------|
| <b>Gianfranco Lamberti</b> | Dipartimento Medicina<br>Riabilitativa AUSL<br>Piacenza                                                       | Società Italiana di Urodinamica (SIUD)                                             | none |
| <b>Roberto Bortolotti</b>  | UO Reumatologia<br>Ospedale S.Chiera,<br>Trento                                                               | Società Italiana di Reumatologia (SIR)                                             | none |
| <b>Chiara Torresetti</b>   | Paideia International<br>Hospital                                                                             | Associazione Italiana di Urologia<br>Ginecologia e del Pavimento Pelvico<br>(AIUG) | none |
| <b>Fabio Bandini</b>       | Department of<br>Neurology, ASL 3<br>Genovese, Genova,<br>Italy                                               | Società Italiana Neurologia (SIN)                                                  | none |
| <b>Giuseppe Botta</b>      | Istituto Fisioterapico<br>Michelangelo di<br>Arezzo                                                           | Società Italiana di Flebolinfologia (SIFL)                                         | none |
| <b>Giancarlo Tancredi</b>  | Pediatric Department.<br>Sapienza Università di<br>Roma                                                       | Società Italiana di Pediatria (SIP)                                                | none |
| <b>Luigi Nappi</b>         | Department of Medical<br>and Surgical Sciences<br>Policlinico Riuniti di<br>Foggia<br>UNIVERSITY OF<br>FOGGIA | Società Italiana Di Ginecologia E<br>Ostetricia (SIGO)                             | none |
| <b>Marco Scorcu</b>        | Servizio di Medicina<br>dello Sport e<br>dell'Esercizio Fisico,<br>Cagliari, ATS                              | Federazione Medico Sportiva Italiana<br>(FMSI)                                     | none |

|                           |                                                                                                                                       |                                                               |      |
|---------------------------|---------------------------------------------------------------------------------------------------------------------------------------|---------------------------------------------------------------|------|
|                           | Sardegna, Cagliari,<br>Italy                                                                                                          |                                                               |      |
| <b>Monica Pierattelli</b> | Presidente SICuPP<br>Toscana, Pediatra di<br>libera scelta Campi<br>Bisenzio (FI)                                                     | Societa' Italiana Delle Cure Primarie<br>Pediatriche (SICuPP) | none |
| <b>Carla Berliri</b>      | Cittadinanzattiva- APS<br>- Sede Nazionale -Staff<br>area Salute - Tribunale<br>per i Diritti del Malato<br>- Politiche della Salute- | Cittadinanzattiva - APS                                       | none |

### Supplementary File 4. Panel of experts comments

| ROUND   | Electrical Stimulation                                                                                                                                                                                                                                                                                         | Neuromodulation, antalgic and interferential electrical currents                                                                                                                                                                                                                | Extracorporeal shock wave therapy                                                                                                                                                                                                                                                                                                                                                                                                                                                                                 | Laser therapy                                                                                                                                   | Electromagnetic therapy                                                                                                                                                                                                                                                                                                                                                      | Diathermy                                                                                                                                                                                                                                                                                                                                                                                                                                                                                                | Hot thermal agent modalities                                                                                                                  | Cryotherapy                                                                                                                                                                                                                                                                                                                                                                                                                         | Ultrasound                                       |
|---------|----------------------------------------------------------------------------------------------------------------------------------------------------------------------------------------------------------------------------------------------------------------------------------------------------------------|---------------------------------------------------------------------------------------------------------------------------------------------------------------------------------------------------------------------------------------------------------------------------------|-------------------------------------------------------------------------------------------------------------------------------------------------------------------------------------------------------------------------------------------------------------------------------------------------------------------------------------------------------------------------------------------------------------------------------------------------------------------------------------------------------------------|-------------------------------------------------------------------------------------------------------------------------------------------------|------------------------------------------------------------------------------------------------------------------------------------------------------------------------------------------------------------------------------------------------------------------------------------------------------------------------------------------------------------------------------|----------------------------------------------------------------------------------------------------------------------------------------------------------------------------------------------------------------------------------------------------------------------------------------------------------------------------------------------------------------------------------------------------------------------------------------------------------------------------------------------------------|-----------------------------------------------------------------------------------------------------------------------------------------------|-------------------------------------------------------------------------------------------------------------------------------------------------------------------------------------------------------------------------------------------------------------------------------------------------------------------------------------------------------------------------------------------------------------------------------------|--------------------------------------------------|
| Round 1 | My Likert Scale rating of 9 stems not only from the numerous evidence but also from the results of my clinical experience. In cases of perineal hypotonia and sphincter deficits, electrical stimulation has facilitated recovery times by enhancing manual work and proprioception during the learning phase. | The primary application of TTNS in my practice, aside from addressing bladder disorders (overactivity), is in the management of painful syndromes, such as spasms of peri-urethral muscles in patients with recurrent post-coital cystitis, vulvodynia, and pudendal neuralgia. | In this case, my assessment requires specificity: In many instances, women experiencing resistant pelvic pain may not readily accept the use of shock waves, as it is an impactful therapy that can cause initial discomfort. Among various instrumental approaches for this patient group, it would not be my first choice. On the other hand, my perspective on shock waves for the treatment of male pelvic pain or erectile dysfunction is quite different; in this case, I positively endorse the statement. | completely agree.                                                                                                                               | I cannot provide a judgment as I lack the appropriate training and experience in its use.                                                                                                                                                                                                                                                                                    | Thanks to the use of diathermy, I can achieve excellent results in the treatment of dermatological conditions affecting the genital mucosa, such as Lichen Sclerosus. In pelvic pain, patients appreciate the mild heat generated by the diathermy probe, allowing for more effective therapy in the area. Currently, this treatment is consistently integrated into all treatment plans, irrespective of individual clinical situations, without causing discomfort or triggering sensitivity reactions | Limited experience in menstrual pain for just the efficacy. However it is related to other type of hot thermal agents (e.g, infrared therapy) | Agreed, but the patient must be adequately instructed in advance on the use and timing of cryotherapy, for example, ice packs postpartum or in inflammatory hemorrhoidal syndromes. Discourage self ice application, and encourage the use of devices designed for healthcare purposes. It is a very useful and easily administered therapy but potentially 'dangerous' if mishandled at home, for instance, the risk of cold burns | For my expertise US is safe in pelvic disorders. |
|         | In the absence of expertise in the pelvic-perineal and neurological domains, the opinion is limited to the musculoskeletal field                                                                                                                                                                               | In the absence of expertise in the pelvic-perineal and neurological domains, the opinion is limited to the musculoskeletal context only.                                                                                                                                        | Shock waves are not recommended in individuals during the developmental age since their tissues and cartilage are still in the developmental phase                                                                                                                                                                                                                                                                                                                                                                | In the absence of expertise in pelvic-perineal, lymphatic, and neurological domains, the opinion is limited to the musculoskeletal context only | In the absence of expertise in pelvic-perineal areas, the opinion is confined to the musculoskeletal context only. The indicated median score pertains to uncertainty regarding the safety of persistent use (long term), as I am not aware of literature data on adverse events for such durations. For treatment cycles falling within the time frames investigated in the | In the absence of expertise in the pelvic-perineal domain, the opinion is confined to the musculoskeletal context only. The moderate agreement with the safety statement primarily concerns uncertainties regarding the operator's safety with high daily exposure to the equipment, especially if potential risk factors are present (e.g., pregnancy or                                                                                                                                                | In my experience, I have observed several cases of mild and transient skin irritations.                                                       | It is the only treatment I have seen used in younger age groups                                                                                                                                                                                                                                                                                                                                                                     | For my expertise US is safe in pelvic disorders. |

|         |                                                                                                                                                                                                                                                                                                                           |                                                          |                                                      |                                                                |                                                                                             |                                                                                                                                                                                                                                                                                                                        |                                                                                                                                               |                                                                                                                                                                                                           |                                                         |
|---------|---------------------------------------------------------------------------------------------------------------------------------------------------------------------------------------------------------------------------------------------------------------------------------------------------------------------------|----------------------------------------------------------|------------------------------------------------------|----------------------------------------------------------------|---------------------------------------------------------------------------------------------|------------------------------------------------------------------------------------------------------------------------------------------------------------------------------------------------------------------------------------------------------------------------------------------------------------------------|-----------------------------------------------------------------------------------------------------------------------------------------------|-----------------------------------------------------------------------------------------------------------------------------------------------------------------------------------------------------------|---------------------------------------------------------|
|         |                                                                                                                                                                                                                                                                                                                           |                                                          |                                                      |                                                                | available RCTs, the judgment is certain                                                     | the presence of oncological pathologies, even if unrecognized). I am not aware of studies monitoring the health of operators exposed to moderate or high levels of possible electromagnetic fields generated by the equipment. Regarding the equipment's safety for the patient, the judgment of agreement is certain. |                                                                                                                                               |                                                                                                                                                                                                           |                                                         |
|         | NMES is widely used to address certain types of pharyngeal dysfunction in adults with dysphagia, but there is limited evidence demonstrating its effectiveness or appropriateness for pediatric patients. Reference: Andreoli S et al. Int J Pediatr Otorhinolaryngol 2019;127:109646. doi: 10.1016/j.ijporl.2019.109646. | NA in some pelvi-perineal and neurological disorders     | NA in some pelvi-perineal and neurological disorders | Adulthood or in individuals with skeletal maturity             | PEMF therapy is not recommended for children who have not yet completed their growth phases | It is not recommended for children as their biological tissues are still in the growth phase                                                                                                                                                                                                                           | I suggest emphasizing more strongly that the use is specifically intended for non-acute arthropathies                                         | Risk of cold burn                                                                                                                                                                                         | Rarely used in adolescents after sports-related traumas |
|         | NA in some perineal neurological disorders                                                                                                                                                                                                                                                                                | For my experience mainly for neurological disorders      |                                                      | NA in some neurological and perineal disorders                 | NA for some perineal disorders                                                              | NA for some perineal disorders                                                                                                                                                                                                                                                                                         | for my expertise, uncertain in groin pain                                                                                                     |                                                                                                                                                                                                           |                                                         |
|         | For my expertise mainly in migraine                                                                                                                                                                                                                                                                                       |                                                          |                                                      | LLLT expertise in some neurological conditions (e.g, migraine) | for my expertise mainly used in migraine                                                    |                                                                                                                                                                                                                                                                                                                        |                                                                                                                                               |                                                                                                                                                                                                           |                                                         |
| Round 2 | Limited in some neurological setting                                                                                                                                                                                                                                                                                      | Useful also for vulvodynia, rectal spasms with anal pain | Uncertainty in some neurological disorders           | limited evidence in some neurological disorders                |                                                                                             | I additionally include post-genital ulcer treatment, hypertonicity, and genital swelling in patients with pelvic pain                                                                                                                                                                                                  | Limited experience in menstrual pain for just the efficacy. However it is related to other type of hot thermal agents (e.g, infrared therapy) | Cryotherapy in pelvic floor rehabilitation is used for the treatment of pain from hemorrhoidal inflammation, postpartum contusion, postpartum hypotonia with pronounced laxity, and for some patients, it | For my expertise US is safe in pelvic disorders.        |

1  
2  
3  
4  
5  
6  
7  
8  
9  
10  
11  
12  
13  
14  
15  
16  
17  
18  
19  
20  
21  
22  
23  
24  
25  
26  
27  
28  
29  
30  
31  
32  
33  
34  
35  
36  
37  
38  
39  
40  
41  
42  
43  
44  
45  
46



1  
2  
3  
4  
5  
6  
7  
8  
9  
10  
11  
12  
13  
14  
15  
16  
17  
18  
19  
20  
21  
22  
23  
24  
25  
26  
27  
28  
29  
30  
31  
32  
33  
34  
35  
36  
37  
38  
39  
40  
41  
42  
43  
44  
45  
46

|  |  |  |  |                                                                                                                                                                                                                                                                                                                                                                                                                                                              |  |  |  |  |                                                                                      |
|--|--|--|--|--------------------------------------------------------------------------------------------------------------------------------------------------------------------------------------------------------------------------------------------------------------------------------------------------------------------------------------------------------------------------------------------------------------------------------------------------------------|--|--|--|--|--------------------------------------------------------------------------------------|
|  |  |  |  |                                                                                                                                                                                                                                                                                                                                                                                                                                                              |  |  |  |  | is beneficial in addressing the sensation of genital swelling in chronic pelvic pain |
|  |  |  |  | I do not have the right clinical experience to rate it with confidence. In my clinical practice, patients who have undergone LLLT have shown a greater tendency towards increased genital dryness. Therefore, the treatment requires additional measures such as enhanced hydration, for example, through the use of serums/ointments/suppositories during the treatment period, to mitigate certain side effects that may cause discomfort to the patients. |  |  |  |  |                                                                                      |

For peer review only

## REFERENCES

1. Regolamento generale sulla protezione dei dati. Regolamento (UE) 2016/679 del Parlamento europeo e del Consiglio del 27 aprile 2016. Available at <https://www.garanteprivacy.it/documents/10160/0/Regolamento+UE+2016+679.+Arricchito+con+riferimenti+ai+Considerando+Aggiornato+alle+rettifiche+pubblicate+sulla+Gazzetta+Ufficiale++dell%27Unione+europea+127+del+23+maggio+2018>.
2. [https://ec.europa.eu/justice/article-29/documentation/opinion-recommendation/files/2014/wp216\\_en.pdf](https://ec.europa.eu/justice/article-29/documentation/opinion-recommendation/files/2014/wp216_en.pdf).
3. [https://commission.europa.eu/sites/default/files/5\\_h2020\\_ethics\\_and\\_data\\_protection\\_0.pdf](https://commission.europa.eu/sites/default/files/5_h2020_ethics_and_data_protection_0.pdf).
4. Bellew JW. Foundations of Clinical Electrotherapy. In: Bellew JW, Michlovitz SL, Nolan Jr TP, eds. Modalities for Therapeutic Intervention, 6e. New York, NY: McGraw-Hill Education 2016.
5. Lake DA. Neuromuscular electrical stimulation. An overview and its application in the treatment of sports injuries. *Sports Med* 1992;13(5):320-36. doi: 10.2165/00007256-199213050-00003 [published Online First: 1992/05/01]
6. Martin R, Sadowsky C, Obst K, et al. Functional electrical stimulation in spinal cord injury:: from theory to practice. *Top Spinal Cord Inj Rehabil* 2012;18(1):28-33. doi: 10.1310/sci1801-28 [published Online First: 2012/01/01]
7. Jones I, Johnson MI. Transcutaneous electrical nerve stimulation. *Continuing Education in Anaesthesia Critical Care & Pain* 2009;9(4):130-35. doi: 10.1093/bjaceaccp/mkp021
8. Mallmann S, Ferla L, Rodrigues MP, et al. Comparison of parasacral transcutaneous electrical stimulation and transcutaneous posterior tibial nerve stimulation in women with overactive bladder syndrome: A randomized clinical trial. *Eur J Obstet Gynecol Reprod Biol* 2020;250:203-08. doi: 10.1016/j.ejogrb.2020.05.005 [published Online First: 2020/05/29]
9. Beatti A, Rayner A, Souvlis T, et al. The analgesic effect of interferential therapy on clinical and experimentally induced pain. *Physical Therapy Reviews* 2010;15(4):243-52. doi: 10.1179/174328810X12647087218992
10. Ingber DE. Mechanobiology and diseases of mechanotransduction. *Ann Med* 2003;35(8):564-77. doi: 10.1080/07853890310016333 [published Online First: 2004/01/08]
11. T. Watson e E. L. Nussbaum, Electrophysical Agents. Evidence-based Practice. 13th Edition, Amsterdam, The Netherlands: Elsevier Health Sciences, 2021.
12. Surace SJ, Deitch J, Johnston RV, et al. Shock wave therapy for rotator cuff disease with or without calcification. *Cochrane Database of Systematic Reviews* 2020(3) doi: 10.1002/14651858.CD008962.pub2
13. Kim EK, Kwak KI. Effect of extracorporeal shock wave therapy on the shoulder joint functional status of patients with calcific tendinitis. *J Phys Ther Sci* 2016;28(9):2522-24. doi: 10.1589/jpts.28.2522 [published Online First: 2016/11/02]
14. Cacchio A, Paoloni M, Barile A, et al. Effectiveness of radial shock-wave therapy for calcific tendinitis of the shoulder: single-blind, randomized clinical study. *Phys Ther* 2006;86(5):672-82. [published Online First: 2006/05/03]
15. Bjordal JM, Lopes-Martins RAB, Joensen J, et al. The anti-inflammatory mechanism of low level laser therapy and its relevance for clinical use in physiotherapy. *Physical Therapy Reviews* 2010;15(4):286-93. doi: 10.1179/1743288X10Y.0000000001
16. Bjordal JM, Johnson MI, Iversen V, et al. Low-level laser therapy in acute pain: a systematic review of possible mechanisms of action and clinical effects in randomized placebo-controlled trials. *Photomed Laser Surg* 2006;24(2):158-68. doi: 10.1089/pho.2006.24.158 [published Online First: 2006/05/19]
17. Song HJ, Seo HJ, Lee Y, et al. Effectiveness of high-intensity laser therapy in the treatment of musculoskeletal disorders: A systematic review and meta-analysis of randomized controlled

1  
2  
3  
4  
5  
6  
7  
8  
9  
10  
11  
12  
13  
14  
15  
16  
17  
18  
19  
20  
21  
22  
23  
24  
25  
26  
27  
28  
29  
30  
31  
32  
33  
34  
35  
36  
37  
38  
39  
40  
41  
42  
43  
44  
45  
46  
47  
48  
49  
50  
51  
52  
53  
54  
55  
56  
57  
58  
59  
60

- trials. *Medicine (Baltimore)* 2018;97(51):e13126. doi: 10.1097/md.00000000000013126 [published Online First: 2018/12/24]
18. Paolucci T, Pezzi L, Centra AM, et al. Electromagnetic Field Therapy: A Rehabilitative Perspective in the Management of Musculoskeletal Pain - A Systematic Review. *J Pain Res* 2020;13:1385-400. doi: 10.2147/jpr.S231778 [published Online First: 2020/07/02]
19. Gordon GA. Designed electromagnetic pulsed therapy: clinical applications. *J Cell Physiol* 2007;212(3):579-82. doi: 10.1002/jcp.21025 [published Online First: 2007/06/20]
20. Smania N, Corato E, Fiaschi A, et al. Repetitive magnetic stimulation: a novel therapeutic approach for myofascial pain syndrome. *J Neurol* 2005;252(3):307-14. doi: 10.1007/s00415-005-0642-1 [published Online First: 2005/02/24]
21. Laufer Y, Dar G. Effectiveness of thermal and athermal short-wave diathermy for the management of knee osteoarthritis: a systematic review and meta-analysis. *Osteoarthritis Cartilage* 2012;20(9):957-66. doi: 10.1016/j.joca.2012.05.005 [published Online First: 2012/06/05]
22. Allen RJ. Physical agents used in the management of chronic pain by physical therapists. *Phys Med Rehabil Clin N Am* 2006;17(2):315-45. doi: 10.1016/j.pmr.2005.12.007 [published Online First: 2006/04/18]
23. Shields N, Gormley J, O'Hare N. Short-Wave Diathermy: A Review of Existing Clinical Trials. *Physical Therapy Reviews* 2001;6(2):101-18. doi: 10.1179/ptr.2001.6.2.101
24. Goats GC. Physiotherapy Treatment Modalities -Microwave diathermy. *Br. J. Sp. Med.* 2012; 24: 212–218.
25. Wang Y, Lu H, Li S, et al. Effect of cold and heat therapies on pain relief in patients with delayed onset muscle soreness: A network meta-analysis. *J Rehabil Med* 2022;54:jrm00258. doi: 10.2340/jrm.v53.331 [published Online First: 2021/10/13]
26. Petrofsky JS, Khowailed IA, Lee H, et al. Cold Vs. Heat After Exercise-Is There a Clear Winner for Muscle Soreness. *J Strength Cond Res* 2015;29(11):3245-52. doi: 10.1519/jsc.0000000000001127 [published Online First: 2015/10/27]
27. Guilhem G, Hug F, Couturier A, et al. Effects of air-pulsed cryotherapy on neuromuscular recovery subsequent to exercise-induced muscle damage. *Am J Sports Med* 2013;41(8):1942-51. doi: 10.1177/0363546513490648 [published Online First: 2013/06/07]
28. Watson T. Ultrasound in contemporary physiotherapy practice. *Ultrasonics* 2008;48(4):321-9. doi: 10.1016/j.ultras.2008.02.004 [published Online First: 2008/05/10]
29. O'Brien WD, Jr. Ultrasound-biophysics mechanisms. *Prog Biophys Mol Biol* 2007;93(1-3):212-55. doi: 10.1016/j.pbiomolbio.2006.07.010 [published Online First: 2006/08/29]

**CREDES Checklist:****Recommendations for the Conducting and REporting of DElphi Studies (CREDES)[1]**

| Items of reporting                                                                                                                                                                                                                                                                                                                                                                                                                                                                                                                                                                                                                                                                                                                                                                                                                                                                       | Reported on page           |
|------------------------------------------------------------------------------------------------------------------------------------------------------------------------------------------------------------------------------------------------------------------------------------------------------------------------------------------------------------------------------------------------------------------------------------------------------------------------------------------------------------------------------------------------------------------------------------------------------------------------------------------------------------------------------------------------------------------------------------------------------------------------------------------------------------------------------------------------------------------------------------------|----------------------------|
| <i>Purpose and rationale.</i> The purpose of the study should be clearly defined and demonstrate the appropriateness of the use of the Delphi technique as a method to achieve the research aim. A rationale for the choice of the Delphi technique as the most suitable method needs to be provided.                                                                                                                                                                                                                                                                                                                                                                                                                                                                                                                                                                                    | 5 - 6                      |
| <i>Expert panel.</i> Criteria for the selection of experts and transparent information on recruitment of the expert panel, sociodemographic details including information on expertise regarding the topic in question, (non)response and response rates over the ongoing iterations should be reported.                                                                                                                                                                                                                                                                                                                                                                                                                                                                                                                                                                                 | 7                          |
| <i>Description of the methods.</i> The methods employed need to be comprehensible; this includes information on preparatory steps (How was available evidence on the topic in question synthesised?), piloting of material and survey instruments, design of the survey instrument(s), the number and design of survey rounds, methods of data analysis, processing and synthesis of experts' responses to inform the subsequent survey round and methodological decisions taken by the research team throughout the process.                                                                                                                                                                                                                                                                                                                                                            | 7-10                       |
| <i>Procedure.</i> Flow chart to illustrate the stages of the Delphi process, including a preparatory phase, the actual 'Delphi rounds', interim steps of data processing and analysis, and concluding steps.                                                                                                                                                                                                                                                                                                                                                                                                                                                                                                                                                                                                                                                                             | 6-9; Figure 1-2            |
| <i>Definition and attainment of consensus.</i> It needs to be comprehensible to the reader how consensus was achieved throughout the process, including strategies to deal with non-consensus.                                                                                                                                                                                                                                                                                                                                                                                                                                                                                                                                                                                                                                                                                           | 9-10                       |
| <i>Results.</i> Reporting of results for each round separately is highly advisable in order to make the evolving of consensus over the rounds transparent. This includes figures showing the average group response, changes between rounds, as well as any modifications of the survey instrument such as deletion, addition or modification of survey items based on previous rounds.                                                                                                                                                                                                                                                                                                                                                                                                                                                                                                  | 10-12; Table 2; Appendix 2 |
| <i>Discussion of limitations.</i> Reporting should include a critical reflection of potential limitations and their impact of the resulting guidance.                                                                                                                                                                                                                                                                                                                                                                                                                                                                                                                                                                                                                                                                                                                                    | 15-16                      |
| <i>Adequacy of conclusions.</i> The conclusions should adequately reflect the outcomes of the Delphi study with a view to the scope and applicability of the resulting practice guidance.                                                                                                                                                                                                                                                                                                                                                                                                                                                                                                                                                                                                                                                                                                | 16                         |
| <i>Publication and dissemination.</i> The resulting guidance on good practice in palliative care should be clearly identifiable from the publication, including recommendations for transfer into practice and implementation. If the publication does not allow for a detailed presentation of either the resulting practice guidance or the methodological features of the applied Delphi technique, or both, reference to a more detailed presentation elsewhere should be made (e.g. availability of the full guideline from the authors or online; publication of a separate paper reporting on methodological details and particularities of the process (e.g. persistent disagreement and controversy on certain issues)). A dissemination plan should include endorsement of the guidance by professional associations and health care authorities to facilitate implementation. | 13-14                      |

1. Jünger S, Payne SA, Brine J, Radbruch L, Brearley SG. Guidance on Conducting and REporting DElphi Studies (CREDES) in palliative care: Recommendations based on a methodological systematic review. *Palliat Med.* 2017;31: 684–706. doi:10.1177/0269216317690685
