# Supplementary material for: Evidence-informed and consensus-based statements about SAFEty of Physical Agent Modalities Practice in physiotherapy and rehabilitation medicine (SAFE PAMP): a national Delphi of healthcare scientific societies
Source: PubMed Central journal article supplement — BMJ Open. 2024 Mar 19;14(3):e075348. doi: 10.1136/bmjopen-2023-075348 (PMC10953005; doi:10.1136/bmjopen-2023-075348), 2024-03-19
Supplement: bmjopen-2023-075348supp002.pdf [file bmjopen-2023-075348supp002.pdf]

## Supplementary Files

|                                                                         |           |
|-------------------------------------------------------------------------|-----------|
| <i>Supplementary File 1. Ethical considerations .....</i>               | <b>2</b>  |
| <i>Supplementary File 2. Physical agent modalities description.....</i> | <b>3</b>  |
| <i>Supplementary File 3. Declaration of interest.....</i>               | <b>6</b>  |
| <i>Supplementary File 4. Panel of experts comments .....</i>            | <b>9</b>  |
| <b>REFERENCES.....</b>                                                  | <b>12</b> |

## Supplementary File 1. Ethical considerations

Participation in the Delphi survey is voluntary and by invitation. The questionnaire includes a beginning section to acquire consent and privacy for data processing. Participants are informed that the responses will have 'remained total confidentiality according to the Regulation on the protection of personal data' 679/2016 of the European Union, and that the results will be used for research purposes and a document shared at the corporate level<sup>1</sup>. The interested party may be interested in the rights provided for by art. 15, 16, 17, 18, 20, 21 and 22 of the Regulation mentioned above.

Database randomization and differential privacy access were achieved. In addition, "anonymization" by generalizing was performed.<sup>2</sup> The study project and data collection were managed and anonymously entrusted by the Unit of Clinical Epidemiology of IRCCS Istituto Ortopedico Galeazzi based in Milano. The data subject cannot be re-identified and is therefore outside the scope of the data protection law<sup>3</sup>.

The row dataset was accessible to two researchers (SG, SB) excluded from participation in Delphi for the quantitative and qualitative analyses. This practice complies with the European standards for the use of aggregative data where the data subject cannot be re-identified, are not personal data and are therefore outside the scope of data protection law<sup>3</sup>. The final report only contains aggregate data. In the final document, we reported the names of the participants who have completed all rounds and gave their consent to disclose their names.

## Supplementary File 2. Physical agent modalities description

**1) Electrical stimulation:** electrotherapeutic currents and waveforms to facilitate neuromuscular or sensory activity to improve muscle strength and reeducate muscle function.<sup>4</sup>

- Neuromuscular electrical stimulation (NMES): use of pulsed currents to stimulate motor nerves, which in turn produce tetanic contractions of the neuromuscular spindles, with or without joint movement.<sup>5</sup>
- Functional Electrical Stimulation (FES) uses electrical pulses to stimulate motor neurons or denervated muscle fibers directly to elicit a contraction during a functional activity (e.g., gait). FES is used in the treatment of orthopedic and neurological conditions.<sup>6</sup>

**2) Neuromodulation, antalgic and interferential electrical currents :** electrotherapeutic currents and waveforms to influence physiological effects on the patient's body structures and functions aiming to modulate pain.<sup>4</sup>

- Transcutaneous electrical nerve stimulation (TENS): delivers electrical stimulation via electrodes placed over the intact skin surface near the source of pain to produce analgesia or hypoalgesia. A wide variety of pulsed waveforms are used, with frequencies typically in the range of 1-100Hz. The intensities are set to produce sensory stimulations alone or in combination with motor stimulations to produce muscle twitches (acupuncture-like TENS).<sup>7</sup>
- Transcutaneous Tibialis Posterior Stimulation (TTNS): a form of neuromodulation involving the use of electrical impulses to address urinary symptoms (e.g. overactive bladder) with inhibitory action on neurons of the spinothalamic tract (S2–S3).<sup>8</sup>
- Interferential current (IC): involves crossing two medium frequency currents (most commonly 4000 Hz), which reportedly generates a low-frequency 'beating' (amplitude-modulated) effect at between 0 and 150 Hz in the deep tissues.<sup>9</sup> These beat frequencies are believed to decrease pain, increase circulation and block nerve conduction.

**3) Extracorporeal shock wave therapy:** a nonsurgical treatment that uses the phenomenon of mechanotransduction (i.e., adapting cells biochemical activity, influencing cells migration, proliferation, differentiation and apoptosis)<sup>10 11</sup> to treat various musculoskeletal conditions (e.g., plantar fasciitis; tennis elbow). Shock wave therapy can be either extracorporeal or radial.<sup>12</sup>

- Extracorporeal shock wave therapy (ESWT) involves passing sound waves (or shock waves) through the skin to the affected area. Shock waves are single pulsed acoustic or sonic waves, which dissipate mechanical energy at the interface of two substances with different acoustic impedance.<sup>13</sup> They are produced by generators of an electrical energy source and require an electroacoustic conversion mechanism and a focusing

device. Three types of systems can be distinguished based upon the sound source: electrohydraulic, electromagnetic and piezoelectric systems. Various doses appear to be used, with no apparent consensus on the minimum therapeutic dose. As defined by Cacchio 2006<sup>14</sup> as low-energy shock waves is less than 0.1 mJ/mm<sup>2</sup> and high-energy shock waves: is 0.2 mJ/mm<sup>2</sup> to 0.4 mJ/mm<sup>2</sup>).

- Radial shock wave therapy (RSWT) is generated through the acceleration of a projectile inside the handpiece of the treatment device and then transmitted radially from the tip of the applicator to the target zone. Radial shock waves show a lower peak pressure and a considerably longer rise time than extracorporeal shock waves. In RSWT, the focal point is not centred on a target zone, as occurs in focal ESWT, but on the tip of the applicator.<sup>14</sup>

**4) Laser therapy:** light source treatment, non-invasive, widely used to treat various musculoskeletal conditions.

- Low-level laser therapy (LLLT) generates a beam of light with a particular wavelength that can deliver light energy to tissue depths below the dermis<sup>15</sup>. Studies suggest that LLLT contributes to pain relief by reducing pro-inflammatory cytokines<sup>16</sup>. The effects of LLLT are considered to be dependent on dosage, wavelength, site and duration of treatment.<sup>15 16</sup>
- high level laser therapy (HLLT): laser with an output power greater than 500 mW or 0.5 Watts. HLLT creates heat on the surface of the skin due to their higher power density (irradiance).<sup>17</sup>

**5) Electromagnetic therapy:** based on Faraday's law of electromagnetic induction, to promote bone healing, treat osteoarthritis and inflammatory diseases of the musculoskeletal system, alleviate pain, enhance healing of ulcers and reduce spasticity<sup>18</sup>.

- Pulsed Electromagnetic Field therapy (PEMF), which involves the delivery of pulsing (that is 'on-off') low-frequency magnetic fields through the body, which is believed to provide temporary pain relief by influencing tissue generation and cell proliferation.<sup>19</sup>

- Repetitive magnetic stimulation (rMS), which allows the transcutaneous induction of nerve stimulating electric currents. This technique requires extremely strong and sharp magnetic impulses (for example 15,000 amperes peak current; 2.5 T field strength; < 1 msec) applied by specially designed coils (< 10 cm) over the target area. Modern devices allow the repetition of up to 60 impulses per second. Mainly developed to study and influence brain functions, rMS also stimulates spinal chord fibres and peripheral nerves. Initial studies used peripheral rMS for therapeutic reasons, such as in myofascial pain syndrome<sup>20</sup>. Since the resulting small electric impulses are the nerve stimulating factor, rMS effects may be similar to TENS.

**6) Shortwave and microwave Diathermy**

- Tecartherapy or radiofrequency diathermy (RFD) is a non-invasive therapy and consists in the emission of high-frequency electromagnetic waves which increase tissue metabolism. This process promotes tissue repair and affects pain sensitivity.<sup>21 22 23</sup>

- Microwave diathermy: a deep heating modality that converts electromagnetic energy to thermal energy. Frequencies approved for therapeutic microwave are 915 MHz (wavelength 33 cm) and 2,456 MHz (wavelength 12 cm). The lower frequency has the advantage of increased depth of penetration but also the disadvantages of greater beam dispersion and the requirement of larger applicators. If muscle heating is primary objective, 915-MHz applicators are preferable to 2,456-MHz applicators. Average temperatures of approximately 41°C at a depth of 1–3 cm have been demonstrated<sup>24</sup>
- 7) **Hot thermal agents:** heat transferred from an object with direct contact to the body. Heat therapy include hot packs, heatwraps, hot/warm water immersion, sauna. Heat treatment increases metabolism in tissues, promotes blood circulation and reduces pain. The temperature of the heat therapy is generally 35–40°C.<sup>25 26</sup>
  - 8) **Cryotherapy:** cold is transferred from an object with direct contact to the body. Examples include cold packs, cold-water immersion ( $\leq 15^{\circ}\text{C}$ ), ice massage, the novel modality of cryotherapy. Cryotherapy is a treatment involving very short exposures to extremely cold dry air to the whole patient or a treatment area (mean temperature of the cryotherapy chamber is at  $-30^{\circ}\text{C}$ ,  $-80$  to  $-110^{\circ}\text{C}$ , or  $< -110^{\circ}\text{C}$ ). Cold treatment is thought to reduce swelling and cell metabolism, minimizing oedema, pain and injury.<sup>25 27</sup>
  - 9) **Therapeutic Ultrasound:** delivers energy to deep tissue sites through ultrasonic waves (often at frequencies of 1 or 3 MHz and intensities between 0.1 watts/cm<sup>2</sup> and 3 watts/cm<sup>2</sup>) using a crystal sound head. Treatment can be delivered in two forms, continuous (non- stop ultrasonic waves) and pulsed (intermittent ultrasonic waves<sup>22 28</sup>). The treatment aim to increase tissue temperature and induce non-thermal physiological changes (such as cell permeability and cell growth), which are believed to promote soft tissue healing and muscle relaxation.<sup>29</sup>

### Supplementary File 3. Declaration of interest

| Name and Surname        | Affiliation                                                                                                                         | Scientific and Technical Societies                                                                                                                                       | Conflict of interest declared |
|-------------------------|-------------------------------------------------------------------------------------------------------------------------------------|--------------------------------------------------------------------------------------------------------------------------------------------------------------------------|-------------------------------|
| <b>Armando Perrotta</b> | IRCCS Neuromed,<br>Pozzilli (IS)                                                                                                    | Società Italiana per lo Studio delle<br>Cefalee (SISC)                                                                                                                   | none                          |
| <b>Viviana Rosati</b>   | A.U.O. Policlinico<br>Umberto I                                                                                                     | Società Italiana di Riabilitazione<br>Neurologica (SIRN)                                                                                                                 | none                          |
| <b>Enrico Marinelli</b> | Department of<br>Anatomical,<br>Histological, Forensic,<br>and Orthopedic<br>Sciences, "Sapienza"<br>University of Rome             | Società Italiana di Medicina Legale e<br>delle Assicurazioni (SIMLA) -<br>Dipartimento di Scienze Biotecnologiche<br>e Medico-chirurgiche Università di Roma<br>Sapienza | none                          |
| <b>Bianca Masturzo</b>  | Obstetrics and<br>Gynecology<br>department. Ospedale<br>degli infermi.<br>Ponderano (Biella)                                        | Associazione degli Ostetrici e Ginecologi<br>Ospedalieri Italiani (AOGOI)                                                                                                | none                          |
| <b>Mauro Roselli</b>    | ASL CittadiTorino-<br>Ospedale Martini-S.C.<br>Ortopedia e<br>Traumatologia                                                         | Ortopedici Traumatologi Ospedalieri<br>d'Italia (OTODI)                                                                                                                  | none                          |
| <b>Stefano Vercelli</b> | Laboratorio di Ricerca<br>in Riabilitazione 2rLab,<br>Dipartimento<br>Economia Aziendale,<br>Sanità e Sociale.<br>SUPSI. Manno (CH) | Federazione Italiana delle Associazione<br>Scientifiche di Fisioterapia (FIASF)                                                                                          | none                          |
| <b>Gianmarco Rea</b>    | Asl Latina, 04100<br>Latina, Italy                                                                                                  | Società Italiana di Medicina Generale e<br>delle Cure Primarie (SIMG)                                                                                                    | none                          |

|                            |                                                                                                   |                                                                              |      |
|----------------------------|---------------------------------------------------------------------------------------------------|------------------------------------------------------------------------------|------|
| <b>Gianfranco Lamberti</b> | Dipartimento Medicina Riabilitativa AUSL Piacenza                                                 | Società Italiana di Urodinamica (SIUD)                                       | none |
| <b>Roberto Bortolotti</b>  | UO Reumatologia Ospedale S.Chiera, Trento                                                         | Società Italiana di Reumatologia (SIR)                                       | none |
| <b>Chiara Torresetti</b>   | Paideia International Hospital                                                                    | Associazione Italiana di Urologia Ginecologia e del Pavimento Pelvico (AIUG) | none |
| <b>Fabio Bandini</b>       | Department of Neurology, ASL 3 Genovese, Genova, Italy                                            | Società Italiana Neurologia (SIN)                                            | none |
| <b>Giuseppe Botta</b>      | Istituto Fisioterapico Michelangelo di Arezzo                                                     | Società Italiana di Flebologia (SIFL)                                        | none |
| <b>Giancarlo Tancredi</b>  | Pediatric Department. Sapienza Università di Roma                                                 | Società Italiana di Pediatria (SIP)                                          | none |
| <b>Luigi Nappi</b>         | Department of Medical and Surgical Sciences Policlinico Riuniti di Foggia<br>UNIVERSITY OF FOGGIA | Società Italiana Di Ginecologia E Ostetricia (SIGO)                          | none |
| <b>Marco Scorcu</b>        | Servizio di Medicina dello Sport e dell'Esercizio Fisico, Cagliari, ATS                           | Federazione Medico Sportiva Italiana (FMSI)                                  | none |

|                           |                                                                                                                                       |                                                               |      |
|---------------------------|---------------------------------------------------------------------------------------------------------------------------------------|---------------------------------------------------------------|------|
|                           | Sardegna, Cagliari,<br>Italy                                                                                                          |                                                               |      |
| <b>Monica Pierattelli</b> | Presidente SICuPP<br>Toscana, Pediatra di<br>libera scelta Campi<br>Bisenzio (FI)                                                     | Societa' Italiana Delle Cure Primarie<br>Pediatriche (SICuPP) | none |
| <b>Carla Berliri</b>      | Cittadinanzattiva- APS<br>- Sede Nazionale -Staff<br>area Salute - Tribunale<br>per i Diritti del Malato<br>- Politiche della Salute- | Cittadinanzattiva - APS                                       | none |



## Supplementary File 4. Panel of experts comments

| ROUND   | Electrical Stimulation                                                                                                                                                                                                                                                                                         | Neuromodulation, antalgic and interferential electrical currents                                                                                                                                                                                                                | Extracorporeal shock wave therapy                                                                                                                                                                                                                                                                                                                                                                                                                                                                                 | Laser therapy                                                                                                                                   | Electromagnetic therapy                                                                                                                                                                                                                                                                                                                                                      | Diathermy                                                                                                                                                                                                                                                                                                                                                                                                                                                                                                | Hot thermal agent modalities                                                                                                                  | Cryotherapy                                                                                                                                                                                                                                                                                                                                                                                                                         | Ultrasound                                       |
|---------|----------------------------------------------------------------------------------------------------------------------------------------------------------------------------------------------------------------------------------------------------------------------------------------------------------------|---------------------------------------------------------------------------------------------------------------------------------------------------------------------------------------------------------------------------------------------------------------------------------|-------------------------------------------------------------------------------------------------------------------------------------------------------------------------------------------------------------------------------------------------------------------------------------------------------------------------------------------------------------------------------------------------------------------------------------------------------------------------------------------------------------------|-------------------------------------------------------------------------------------------------------------------------------------------------|------------------------------------------------------------------------------------------------------------------------------------------------------------------------------------------------------------------------------------------------------------------------------------------------------------------------------------------------------------------------------|----------------------------------------------------------------------------------------------------------------------------------------------------------------------------------------------------------------------------------------------------------------------------------------------------------------------------------------------------------------------------------------------------------------------------------------------------------------------------------------------------------|-----------------------------------------------------------------------------------------------------------------------------------------------|-------------------------------------------------------------------------------------------------------------------------------------------------------------------------------------------------------------------------------------------------------------------------------------------------------------------------------------------------------------------------------------------------------------------------------------|--------------------------------------------------|
| Round 1 | My Likert Scale rating of 9 stems not only from the numerous evidence but also from the results of my clinical experience. In cases of perineal hypotonia and sphincter deficits, electrical stimulation has facilitated recovery times by enhancing manual work and proprioception during the learning phase. | The primary application of TTNS in my practice, aside from addressing bladder disorders (overactivity), is in the management of painful syndromes, such as spasms of peri-urethral muscles in patients with recurrent post-coital cystitis, vulvodynia, and pudendal neuralgia. | In this case, my assessment requires specificity: In many instances, women experiencing resistant pelvic pain may not readily accept the use of shock waves, as it is an impactful therapy that can cause initial discomfort. Among various instrumental approaches for this patient group, it would not be my first choice. On the other hand, my perspective on shock waves for the treatment of male pelvic pain or erectile dysfunction is quite different; in this case, I positively endorse the statement. | completely agree.                                                                                                                               | I cannot provide a judgment as I lack the appropriate training and experience in its use.                                                                                                                                                                                                                                                                                    | Thanks to the use of diathermy, I can achieve excellent results in the treatment of dermatological conditions affecting the genital mucosa, such as Lichen Sclerosus. In pelvic pain, patients appreciate the mild heat generated by the diathermy probe, allowing for more effective therapy in the area. Currently, this treatment is consistently integrated into all treatment plans, irrespective of individual clinical situations, without causing discomfort or triggering sensitivity reactions | Limited experience in menstrual pain for just the efficacy. However it is related to other type of hot thermal agents (e.g, infrared therapy) | Agreed, but the patient must be adequately instructed in advance on the use and timing of cryotherapy, for example, ice packs postpartum or in inflammatory hemorrhoidal syndromes. Discourage self ice application, and encourage the use of devices designed for healthcare purposes. It is a very useful and easily administered therapy but potentially 'dangerous' if mishandled at home, for instance, the risk of cold burns | For my expertise US is safe in pelvic disorders. |
|         | In the absence of expertise in the pelvic-perineal and neurological domains, the opinion is limited to the musculoskeletal field                                                                                                                                                                               | In the absence of expertise in the pelvic-perineal and neurological domains, the opinion is limited to the musculoskeletal context only.                                                                                                                                        | Shock waves are not recommended in individuals during the developmental age since their tissues and cartilage are still in the developmental phase                                                                                                                                                                                                                                                                                                                                                                | In the absence of expertise in pelvic-perineal, lymphatic, and neurological domains, the opinion is limited to the musculoskeletal context only | In the absence of expertise in pelvic-perineal areas, the opinion is confined to the musculoskeletal context only. The indicated median score pertains to uncertainty regarding the safety of persistent use (long term), as I am not aware of literature data on adverse events for such durations. For treatment cycles falling within the time frames investigated in the | In the absence of expertise in the pelvic-perineal domain, the opinion is confined to the musculoskeletal context only. The moderate agreement with the safety statement primarily concerns uncertainties regarding the operator's safety with high daily exposure to the equipment, especially if potential risk factors are present (e.g., pregnancy or                                                                                                                                                | In my experience, I have observed several cases of mild and transient skin irritations.                                                       | It is the only treatment I have seen used in younger age groups                                                                                                                                                                                                                                                                                                                                                                     | For my expertise US is safe in pelvic disorders. |

|         |                                                                                                                                                                                                                                                                                                                           |                                                          |                                                      |                                                                |                                                                                             |                                                                                                                                                                                                                                                                                                                        |                                                                                                                                               |                                                                                                                                                                                                           |                                                         |
|---------|---------------------------------------------------------------------------------------------------------------------------------------------------------------------------------------------------------------------------------------------------------------------------------------------------------------------------|----------------------------------------------------------|------------------------------------------------------|----------------------------------------------------------------|---------------------------------------------------------------------------------------------|------------------------------------------------------------------------------------------------------------------------------------------------------------------------------------------------------------------------------------------------------------------------------------------------------------------------|-----------------------------------------------------------------------------------------------------------------------------------------------|-----------------------------------------------------------------------------------------------------------------------------------------------------------------------------------------------------------|---------------------------------------------------------|
|         |                                                                                                                                                                                                                                                                                                                           |                                                          |                                                      |                                                                | available RCTs, the judgment is certain                                                     | the presence of oncological pathologies, even if unrecognized). I am not aware of studies monitoring the health of operators exposed to moderate or high levels of possible electromagnetic fields generated by the equipment. Regarding the equipment's safety for the patient, the judgment of agreement is certain. |                                                                                                                                               |                                                                                                                                                                                                           |                                                         |
|         | NMES is widely used to address certain types of pharyngeal dysfunction in adults with dysphagia, but there is limited evidence demonstrating its effectiveness or appropriateness for pediatric patients. Reference: Andreoli S et al. Int J Pediatr Otorhinolaryngol 2019;127:109646. doi: 10.1016/j.ijporl.2019.109646. | NA in some pelvi-perineal and neurological disorders     | NA in some pelvi-perineal and neurological disorders | Adulthood or in individuals with skeletal maturity             | PEMF therapy is not recommended for children who have not yet completed their growth phases | It is not recommended for children as their biological tissues are still in the growth phase                                                                                                                                                                                                                           | I suggest emphasizing more strongly that the use is specifically intended for non-acute arthropathies                                         | Risk of cold burn                                                                                                                                                                                         | Rarely used in adolescents after sports-related traumas |
|         | NA in some perineal neurological disorders                                                                                                                                                                                                                                                                                | For my experience mainly for neurological disorders      |                                                      | NA in some neurological and perineal disorders                 | NA for some perineal disorders                                                              | NA for some perineal disorders                                                                                                                                                                                                                                                                                         | for my expertise, uncertain in groin pain                                                                                                     |                                                                                                                                                                                                           |                                                         |
|         | For my expertise mainly in migraine                                                                                                                                                                                                                                                                                       |                                                          |                                                      | LLLT expertise in some neurological conditions (e.g, migraine) | for my expertise mainly used in migraine                                                    |                                                                                                                                                                                                                                                                                                                        |                                                                                                                                               |                                                                                                                                                                                                           |                                                         |
| Round 2 | Limited in some neurological setting                                                                                                                                                                                                                                                                                      | Useful also for vulvodynia, rectal spasms with anal pain | Uncertainty in some neurological disorders           | limited evidence in some neurological disorders                |                                                                                             | I additionally include post-genital ulcer treatment, hypertonicity, and genital swelling in patients with pelvic pain                                                                                                                                                                                                  | Limited experience in menstrual pain for just the efficacy. However it is related to other type of hot thermal agents (e.g, infrared therapy) | Cryotherapy in pelvic floor rehabilitation is used for the treatment of pain from hemorrhoidal inflammation, postpartum contusion, postpartum hypotonia with pronounced laxity, and for some patients, it | For my expertise US is safe in pelvic disorders.        |

|  |  |  |  |                                                                                                                                                                                                                                                                                                                                                                                                                                                              |  |  |  |  |                                                                                      |  |
|--|--|--|--|--------------------------------------------------------------------------------------------------------------------------------------------------------------------------------------------------------------------------------------------------------------------------------------------------------------------------------------------------------------------------------------------------------------------------------------------------------------|--|--|--|--|--------------------------------------------------------------------------------------|--|
|  |  |  |  |                                                                                                                                                                                                                                                                                                                                                                                                                                                              |  |  |  |  | is beneficial in addressing the sensation of genital swelling in chronic pelvic pain |  |
|  |  |  |  | I do not have the right clinical experience to rate it with confidence. In my clinical practice, patients who have undergone LLLT have shown a greater tendency towards increased genital dryness. Therefore, the treatment requires additional measures such as enhanced hydration, for example, through the use of serums/ointments/suppositories during the treatment period, to mitigate certain side effects that may cause discomfort to the patients. |  |  |  |  |                                                                                      |  |

## REFERENCES

1. Regolamento generale sulla protezione dei dati. Regolamento (UE) 2016/679 del Parlamento europeo e del Consiglio del 27 aprile 2016. Available at <https://www.garanteprivacy.it/documents/10160/0/Regolamento+UE+2016+679.+Arricchito+con+riferimenti+ai+Considerando+Aggiornato+alle+rettifiche+pubblicate+sulla+Gazzetta+Ufficiale++dell%27Unione+europea+127+del+23+maggio+2018>.
2. [https://ec.europa.eu/justice/article-29/documentation/opinion-recommendation/files/2014/wp216\\_en.pdf](https://ec.europa.eu/justice/article-29/documentation/opinion-recommendation/files/2014/wp216_en.pdf).
3. [https://commission.europa.eu/sites/default/files/5\\_h2020\\_ethics\\_and\\_data\\_protection\\_0.pdf](https://commission.europa.eu/sites/default/files/5_h2020_ethics_and_data_protection_0.pdf).
4. Bellew JW. Foundations of Clinical Electrotherapy. In: Bellew JW, Michlovitz SL, Nolan Jr TP, eds. *Modalities for Therapeutic Intervention*, 6e. New York, NY: McGraw-Hill Education 2016.
5. Lake DA. Neuromuscular electrical stimulation. An overview and its application in the treatment of sports injuries. *Sports Med* 1992;13(5):320-36. doi: 10.2165/00007256-199213050-00003 [published Online First: 1992/05/01]
6. Martin R, Sadowsky C, Obst K, et al. Functional electrical stimulation in spinal cord injury:: from theory to practice. *Top Spinal Cord Inj Rehabil* 2012;18(1):28-33. doi: 10.1310/sci1801-28 [published Online First: 2012/01/01]
7. Jones I, Johnson MI. Transcutaneous electrical nerve stimulation. *Continuing Education in Anaesthesia Critical Care & Pain* 2009;9(4):130-35. doi: 10.1093/bjaceaccp/mkp021
8. Mallmann S, Ferla L, Rodrigues MP, et al. Comparison of parasacral transcutaneous electrical stimulation and transcutaneous posterior tibial nerve stimulation in women with overactive bladder syndrome: A randomized clinical trial. *Eur J Obstet Gynecol Reprod Biol* 2020;250:203-08. doi: 10.1016/j.ejogrb.2020.05.005 [published Online First: 2020/05/29]
9. Beatti A, Rayner A, Souvlis T, et al. The analgesic effect of interferential therapy on clinical and experimentally induced pain. *Physical Therapy Reviews* 2010;15(4):243-52. doi: 10.1179/174328810X12647087218992
10. Ingber DE. Mechanobiology and diseases of mechanotransduction. *Ann Med* 2003;35(8):564-77. doi: 10.1080/07853890310016333 [published Online First: 2004/01/08]
11. T. Watson e E. L. Nussbaum, *Electrophysical Agents. Evidence-based Practice*. 13th Edition, Amsterdam, The Netherlands: Elsevier Health Sciences, 2021.
12. Surace SJ, Deitch J, Johnston RV, et al. Shock wave therapy for rotator cuff disease with or without calcification. *Cochrane Database of Systematic Reviews* 2020(3) doi: 10.1002/14651858.CD008962.pub2
13. Kim EK, Kwak KI. Effect of extracorporeal shock wave therapy on the shoulder joint functional status of patients with calcific tendinitis. *J Phys Ther Sci* 2016;28(9):2522-24. doi: 10.1589/jpts.28.2522 [published Online First: 2016/11/02]
14. Cacchio A, Paoloni M, Barile A, et al. Effectiveness of radial shock-wave therapy for calcific tendinitis of the shoulder: single-blind, randomized clinical study. *Phys Ther* 2006;86(5):672-82. [published Online First: 2006/05/03]
15. Bjordal JM, Lopes-Martins RAB, Joensen J, et al. The anti-inflammatory mechanism of low level laser therapy and its relevance for clinical use in physiotherapy. *Physical Therapy Reviews* 2010;15(4):286-93. doi: 10.1179/1743288X10Y.0000000001
16. Bjordal JM, Johnson MI, Iversen V, et al. Low-level laser therapy in acute pain: a systematic review of possible mechanisms of action and clinical effects in randomized placebo-controlled trials. *Photomed Laser Surg* 2006;24(2):158-68. doi: 10.1089/pho.2006.24.158 [published Online First: 2006/05/19]
17. Song HJ, Seo HJ, Lee Y, et al. Effectiveness of high-intensity laser therapy in the treatment of musculoskeletal disorders: A systematic review and meta-analysis of randomized controlled

- trials. *Medicine (Baltimore)* 2018;97(51):e13126. doi: 10.1097/md.00000000000013126 [published Online First: 2018/12/24]
18. Paolucci T, Pezzi L, Centra AM, et al. Electromagnetic Field Therapy: A Rehabilitative Perspective in the Management of Musculoskeletal Pain - A Systematic Review. *J Pain Res* 2020;13:1385-400. doi: 10.2147/jpr.S231778 [published Online First: 2020/07/02]
  19. Gordon GA. Designed electromagnetic pulsed therapy: clinical applications. *J Cell Physiol* 2007;212(3):579-82. doi: 10.1002/jcp.21025 [published Online First: 2007/06/20]
  20. Smania N, Corato E, Fiaschi A, et al. Repetitive magnetic stimulation: a novel therapeutic approach for myofascial pain syndrome. *J Neurol* 2005;252(3):307-14. doi: 10.1007/s00415-005-0642-1 [published Online First: 2005/02/24]
  21. Laufer Y, Dar G. Effectiveness of thermal and athermal short-wave diathermy for the management of knee osteoarthritis: a systematic review and meta-analysis. *Osteoarthritis Cartilage* 2012;20(9):957-66. doi: 10.1016/j.joca.2012.05.005 [published Online First: 2012/06/05]
  22. Allen RJ. Physical agents used in the management of chronic pain by physical therapists. *Phys Med Rehabil Clin N Am* 2006;17(2):315-45. doi: 10.1016/j.pmr.2005.12.007 [published Online First: 2006/04/18]
  23. Shields N, Gormley J, O'Hare N. Short-Wave Diathermy: A Review of Existing Clinical Trials. *Physical Therapy Reviews* 2001;6(2):101-18. doi: 10.1179/ptr.2001.6.2.101
  24. Goats GC. Physiotherapy Treatment Modalities -Microwave diathermy. *Br. J. Sp. Med.* 2012; 24: 212-218.
  25. Wang Y, Lu H, Li S, et al. Effect of cold and heat therapies on pain relief in patients with delayed onset muscle soreness: A network meta-analysis. *J Rehabil Med* 2022;54:jrm00258. doi: 10.2340/jrm.v53.331 [published Online First: 2021/10/13]
  26. Petrofsky JS, Khowailed IA, Lee H, et al. Cold Vs. Heat After Exercise-Is There a Clear Winner for Muscle Soreness. *J Strength Cond Res* 2015;29(11):3245-52. doi: 10.1519/jsc.0000000000001127 [published Online First: 2015/10/27]
  27. Guilhem G, Hug F, Couturier A, et al. Effects of air-pulsed cryotherapy on neuromuscular recovery subsequent to exercise-induced muscle damage. *Am J Sports Med* 2013;41(8):1942-51. doi: 10.1177/0363546513490648 [published Online First: 2013/06/07]
  28. Watson T. Ultrasound in contemporary physiotherapy practice. *Ultrasonics* 2008;48(4):321-9. doi: 10.1016/j.ultras.2008.02.004 [published Online First: 2008/05/10]
  29. O'Brien WD, Jr. Ultrasound-biophysics mechanisms. *Prog Biophys Mol Biol* 2007;93(1-3):212-55. doi: 10.1016/j.pbiomolbio.2006.07.010 [published Online First: 2006/08/29]
